# Supplementary material
Source: publisher figshare collection journal article supplement (https://rs.figshare.com/ndownloader/files/24263579)
Supplement: Supplementary file 1 [file 24263579]

## Sheet: Table_S1_metadata
Table S1. Full reference metadata for all accessed and analyzed sample data.
SAMPLE_ID	NAME	HOST	LIFESTAGE	COMMUNITY	SUBSISTENCE	AGE	SEX	STUDY	OTHER	ACCESSION	READS	SEQ_TECH	REGION	PRIMERS
BA26	NA	human	adult	Bassa	rural_farming	NA	NA	Ayeni2018	NA	NA	24774	illumina	v3v4	341F 805R
BA27	NA	human	adult	Bassa	rural_farming	NA	NA	Ayeni2018	NA	NA	22255	illumina	v3v4	341F 805R
BA28	NA	human	adult	Bassa	rural_farming	NA	NA	Ayeni2018	NA	NA	38234	illumina	v3v4	341F 805R
BA29	NA	human	adult	Bassa	rural_farming	NA	NA	Ayeni2018	NA	NA	30552	illumina	v3v4	341F 805R
BA30	NA	human	adult	Bassa	rural_farming	NA	NA	Ayeni2018	NA	NA	46257	illumina	v3v4	341F 805R
BA31	NA	human	adult	Bassa	rural_farming	NA	NA	Ayeni2018	NA	NA	77763	illumina	v3v4	341F 805R
BA32	NA	human	adult	Bassa	rural_farming	NA	NA	Ayeni2018	NA	NA	48030	illumina	v3v4	341F 805R
BA34	NA	human	adult	Bassa	rural_farming	NA	NA	Ayeni2018	NA	NA	27846	illumina	v3v4	341F 805R
BC10	NA	human	child	Bassa	rural_farming	NA	NA	Ayeni2018	NA	NA	4798	illumina	v3v4	341F 805R
BC1	NA	human	child	Bassa	rural_farming	NA	NA	Ayeni2018	NA	NA	25539	illumina	v3v4	341F 805R
BC2	NA	human	child	Bassa	rural_farming	NA	NA	Ayeni2018	NA	NA	11259	illumina	v3v4	341F 805R
BC3	NA	human	child	Bassa	rural_farming	NA	NA	Ayeni2018	NA	NA	13714	illumina	v3v4	341F 805R
BC4	NA	human	child	Bassa	rural_farming	NA	NA	Ayeni2018	NA	NA	32408	illumina	v3v4	341F 805R
BC5	NA	human	child	Bassa	rural_farming	NA	NA	Ayeni2018	NA	NA	42387	illumina	v3v4	341F 805R
BC6	NA	human	child	Bassa	rural_farming	NA	NA	Ayeni2018	NA	NA	40710	illumina	v3v4	341F 805R
BC7	NA	human	child	Bassa	rural_farming	NA	NA	Ayeni2018	NA	NA	33769	illumina	v3v4	341F 805R
BC8	NA	human	child	Bassa	rural_farming	NA	NA	Ayeni2018	NA	NA	41849	illumina	v3v4	341F 805R
UA36	NA	human	adult	urban_Nigerian	urban	NA	NA	Ayeni2018	NA	NA	11566	illumina	v3v4	341F 805R
UA37	NA	human	adult	urban_Nigerian	urban	NA	NA	Ayeni2018	NA	NA	44084	illumina	v3v4	341F 805R
UA38	NA	human	adult	urban_Nigerian	urban	NA	NA	Ayeni2018	NA	NA	75830	illumina	v3v4	341F 805R
UA39	NA	human	adult	urban_Nigerian	urban	NA	NA	Ayeni2018	NA	NA	41704	illumina	v3v4	341F 805R
UA40	NA	human	adult	urban_Nigerian	urban	NA	NA	Ayeni2018	NA	NA	134288	illumina	v3v4	341F 805R
UA41	NA	human	adult	urban_Nigerian	urban	NA	NA	Ayeni2018	NA	NA	51486	illumina	v3v4	341F 805R
UA42	NA	human	adult	urban_Nigerian	urban	NA	NA	Ayeni2018	NA	NA	47662	illumina	v3v4	341F 805R
UA43	NA	human	adult	urban_Nigerian	urban	NA	NA	Ayeni2018	NA	NA	107427	illumina	v3v4	341F 805R
UA44	NA	human	adult	urban_Nigerian	urban	NA	NA	Ayeni2018	NA	NA	90762	illumina	v3v4	341F 805R
UA46	NA	human	adult	urban_Nigerian	urban	NA	NA	Ayeni2018	NA	NA	60829	illumina	v3v4	341F 805R
UA47	NA	human	adult	urban_Nigerian	urban	NA	NA	Ayeni2018	NA	NA	44936	illumina	v3v4	341F 805R
UA48	NA	human	adult	urban_Nigerian	urban	NA	NA	Ayeni2018	NA	NA	67886	illumina	v3v4	341F 805R
UA49	NA	human	adult	urban_Nigerian	urban	NA	NA	Ayeni2018	NA	NA	74674	illumina	v3v4	341F 805R
UA50	NA	human	adult	urban_Nigerian	urban	NA	NA	Ayeni2018	NA	NA	6988	illumina	v3v4	341F 805R
UA51	NA	human	adult	urban_Nigerian	urban	NA	NA	Ayeni2018	NA	NA	73503	illumina	v3v4	341F 805R
UA52	NA	human	adult	urban_Nigerian	urban	NA	NA	Ayeni2018	NA	NA	62336	illumina	v3v4	341F 805R
UA53	NA	human	adult	urban_Nigerian	urban	NA	NA	Ayeni2018	NA	NA	83571	illumina	v3v4	341F 805R
UA54	NA	human	adult	urban_Nigerian	urban	NA	NA	Ayeni2018	NA	NA	57330	illumina	v3v4	341F 805R
UA55	NA	human	adult	urban_Nigerian	urban	NA	NA	Ayeni2018	NA	NA	80893	illumina	v3v4	341F 805R
UC11	NA	human	child	urban_Nigerian	urban	NA	NA	Ayeni2018	NA	NA	50423	illumina	v3v4	341F 805R
UC12	NA	human	child	urban_Nigerian	urban	NA	NA	Ayeni2018	NA	NA	81234	illumina	v3v4	341F 805R
UC13	NA	human	child	urban_Nigerian	urban	NA	NA	Ayeni2018	NA	NA	73667	illumina	v3v4	341F 805R
UC14	NA	human	child	urban_Nigerian	urban	NA	NA	Ayeni2018	NA	NA	34394	illumina	v3v4	341F 805R
UC15	NA	human	child	urban_Nigerian	urban	NA	NA	Ayeni2018	NA	NA	53723	illumina	v3v4	341F 805R
UC16	NA	human	child	urban_Nigerian	urban	NA	NA	Ayeni2018	NA	NA	64172	illumina	v3v4	341F 805R
UC17	NA	human	child	urban_Nigerian	urban	NA	NA	Ayeni2018	NA	NA	46628	illumina	v3v4	341F 805R
UC18	NA	human	child	urban_Nigerian	urban	NA	NA	Ayeni2018	NA	NA	76593	illumina	v3v4	341F 805R
UC19	NA	human	child	urban_Nigerian	urban	NA	NA	Ayeni2018	NA	NA	43760	illumina	v3v4	341F 805R
UC20	NA	human	child	urban_Nigerian	urban	NA	NA	Ayeni2018	NA	NA	33472	illumina	v3v4	341F 805R
UC21	NA	human	child	urban_Nigerian	urban	NA	NA	Ayeni2018	NA	NA	55966	illumina	v3v4	341F 805R
UC22	NA	human	child	urban_Nigerian	urban	NA	NA	Ayeni2018	NA	NA	68134	illumina	v3v4	341F 805R
UC24	NA	human	child	urban_Nigerian	urban	NA	NA	Ayeni2018	NA	NA	42228	illumina	v3v4	341F 805R
X2501Juil2	N01	human	adult	Nunavut	rural_arctic	37	Male	Dubois2017	NA	NA	51103	illumina	v4	515F 786R
X2502Juil1P	N02	human	adult	Nunavut	rural_arctic	35	Female	Dubois2017	NA	NA	68358	illumina	v4	515F 786R
X2502Juil2	N02	human	adult	Nunavut	rural_arctic	35	Female	Dubois2017	NA	NA	62833	illumina	v4	515F 786R
X2502JuilC	N02	human	adult	Nunavut	rural_arctic	35	Female	Dubois2017	NA	NA	37316	illumina	v4	515F 786R
X2503Aout	N03	human	adult	Nunavut	rural_arctic	58	Male	Dubois2017	NA	NA	60135	illumina	v4	515F 786R
X2503Dec	N03	human	adult	Nunavut	rural_arctic	58	Male	Dubois2017	NA	NA	51833	illumina	v4	515F 786R
X2503Juil1P	N03	human	adult	Nunavut	rural_arctic	58	Male	Dubois2017	NA	NA	137808	illumina	v4	515F 786R
X2503JuilC	N03	human	adult	Nunavut	rural_arctic	58	Male	Dubois2017	NA	NA	111970	illumina	v4	515F 786R
X2503Nov	N03	human	adult	Nunavut	rural_arctic	58	Male	Dubois2017	NA	NA	98876	illumina	v4	515F 786R
X2503Oct	N03	human	adult	Nunavut	rural_arctic	58	Male	Dubois2017	NA	NA	112811	illumina	v4	515F 786R
X2503Sept	N03	human	adult	Nunavut	rural_arctic	58	Male	Dubois2017	NA	NA	98166	illumina	v4	515F 786R
X2504Juil1P	N04	human	adult	Nunavut	rural_arctic	60	Female	Dubois2017	NA	NA	69444	illumina	v4	515F 786R
X2504Juil2	N04	human	adult	Nunavut	rural_arctic	60	Female	Dubois2017	NA	NA	67126	illumina	v4	515F 786R
X2505JuilC	N05	human	adult	Nunavut	rural_arctic	63	Female	Dubois2017	NA	NA	102885	illumina	v4	515F 786R
X2506Dec	N06	human	adult	Nunavut	rural_arctic	42	Female	Dubois2017	NA	NA	130361	illumina	v4	515F 786R
X2506Juil1C	N06	human	adult	Nunavut	rural_arctic	42	Female	Dubois2017	NA	NA	95875	illumina	v4	515F 786R
X2506Juil1P	N06	human	adult	Nunavut	rural_arctic	42	Female	Dubois2017	NA	NA	57870	illumina	v4	515F 786R
X2506Juil2	N06	human	adult	Nunavut	rural_arctic	42	Female	Dubois2017	NA	NA	110347	illumina	v4	515F 786R
X2506Sept	N06	human	adult	Nunavut	rural_arctic	42	Female	Dubois2017	NA	NA	70366	illumina	v4	515F 786R
X2507Juil1C	N07	human	adult	Nunavut	rural_arctic	67	Female	Dubois2017	NA	NA	26708	illumina	v4	515F 786R
X2507Juil2	N07	human	adult	Nunavut	rural_arctic	67	Female	Dubois2017	NA	NA	63252	illumina	v4	515F 786R
X2507Oct	N07	human	adult	Nunavut	rural_arctic	67	Female	Dubois2017	NA	NA	45346	illumina	v4	515F 786R
X2507Sept	N07	human	adult	Nunavut	rural_arctic	67	Female	Dubois2017	NA	NA	59269	illumina	v4	515F 786R
X2508Dec	N08	human	adult	Nunavut	rural_arctic	37	Female	Dubois2017	NA	NA	79685	illumina	v4	515F 786R
X2508Juil1P	N08	human	adult	Nunavut	rural_arctic	37	Female	Dubois2017	NA	NA	46265	illumina	v4	515F 786R
X2508JuilC	N08	human	adult	Nunavut	rural_arctic	37	Female	Dubois2017	NA	NA	48912	illumina	v4	515F 786R
X2508aout	N08	human	adult	Nunavut	rural_arctic	37	Female	Dubois2017	NA	NA	117263	illumina	v4	515F 786R
X2509Juil1P	N09	human	adult	Nunavut	rural_arctic	26	Female	Dubois2017	NA	NA	129395	illumina	v4	515F 786R
X2509JuilC	N09	human	adult	Nunavut	rural_arctic	26	Female	Dubois2017	NA	NA	121019	illumina	v4	515F 786R
X2509Sept	N09	human	adult	Nunavut	rural_arctic	26	Female	Dubois2017	NA	NA	60363	illumina	v4	515F 786R
X2509aout	N09	human	adult	Nunavut	rural_arctic	26	Female	Dubois2017	NA	NA	63353	illumina	v4	515F 786R
X2510Dec	N10	human	adult	Nunavut	rural_arctic	56	Female	Dubois2017	NA	NA	67516	illumina	v4	515F 786R
X2510Juil1C	N10	human	adult	Nunavut	rural_arctic	56	Female	Dubois2017	NA	NA	52615	illumina	v4	515F 786R
X2510JuilP	N10	human	adult	Nunavut	rural_arctic	56	Female	Dubois2017	NA	NA	78851	illumina	v4	515F 786R
X2510Nov	N10	human	adult	Nunavut	rural_arctic	56	Female	Dubois2017	NA	NA	63157	illumina	v4	515F 786R
X2510Sept	N10	human	adult	Nunavut	rural_arctic	56	Female	Dubois2017	NA	NA	70114	illumina	v4	515F 786R
X2511Juil1P	N11	human	adult	Nunavut	rural_arctic	39	Female	Dubois2017	NA	NA	81034	illumina	v4	515F 786R
X2511Oct	N11	human	adult	Nunavut	rural_arctic	39	Female	Dubois2017	NA	NA	85299	illumina	v4	515F 786R
X2511Sept	N11	human	adult	Nunavut	rural_arctic	39	Female	Dubois2017	NA	NA	103924	illumina	v4	515F 786R
X2512Juil1C	N12	human	adult	Nunavut	rural_arctic	65	Male	Dubois2017	NA	NA	87099	illumina	v4	515F 786R
X2512Juil1P	N12	human	adult	Nunavut	rural_arctic	65	Male	Dubois2017	NA	NA	69452	illumina	v4	515F 786R
X2513Juil1C	N13	human	adult	Nunavut	rural_arctic	52	Female	Dubois2017	NA	NA	82562	illumina	v4	515F 786R
X2513Juil1P	N13	human	adult	Nunavut	rural_arctic	52	Female	Dubois2017	NA	NA	67912	illumina	v4	515F 786R
X2514Juil1C	N14	human	adult	Nunavut	rural_arctic	24	Female	Dubois2017	NA	NA	38161	illumina	v4	515F 786R
X2514JuilP	N14	human	adult	Nunavut	rural_arctic	24	Female	Dubois2017	NA	NA	62099	illumina	v4	515F 786R
X2515Aout	N15	human	adult	Nunavut	rural_arctic	36	Female	Dubois2017	NA	NA	38578	illumina	v4	515F 786R
X2515Juil1C	N15	human	adult	Nunavut	rural_arctic	36	Female	Dubois2017	NA	NA	53471	illumina	v4	515F 786R
X2601Dec	M01	human	adult	Montreal	urban	23	Female	Dubois2017	NA	NA	80644	illumina	v4	515F 786R
X2601Nov	M01	human	adult	Montreal	urban	23	Female	Dubois2017	NA	NA	52561	illumina	v4	515F 786R
X2601OctC	M01	human	adult	Montreal	urban	23	Female	Dubois2017	NA	NA	62730	illumina	v4	515F 786R
X2601OctP	M01	human	adult	Montreal	urban	23	Female	Dubois2017	NA	NA	67095	illumina	v4	515F 786R
X2602Jan	M02	human	adult	Montreal	urban	24	Female	Dubois2017	NA	NA	74190	illumina	v4	515F 786R
X2602OctP	M02	human	adult	Montreal	urban	24	Female	Dubois2017	NA	NA	54377	illumina	v4	515F 786R
X2603Dec	M03	human	adult	Montreal	urban	48	Male	Dubois2017	NA	NA	72905	illumina	v4	515F 786R
X2603Nov	M03	human	adult	Montreal	urban	48	Male	Dubois2017	NA	NA	21385	illumina	v4	515F 786R
X2603OctC	M03	human	adult	Montreal	urban	48	Male	Dubois2017	NA	NA	73534	illumina	v4	515F 786R
X2603OctP	M03	human	adult	Montreal	urban	48	Male	Dubois2017	NA	NA	93163	illumina	v4	515F 786R
X2604Dec	M04	human	adult	Montreal	urban	37	Male	Dubois2017	NA	NA	60834	illumina	v4	515F 786R
X2604Nov	M04	human	adult	Montreal	urban	37	Male	Dubois2017	NA	NA	50183	illumina	v4	515F 786R
X2604OctC	M04	human	adult	Montreal	urban	37	Male	Dubois2017	NA	NA	80754	illumina	v4	515F 786R
X2604OctP	M04	human	adult	Montreal	urban	37	Male	Dubois2017	NA	NA	78980	illumina	v4	515F 786R
X2605Nov	M05	human	adult	Montreal	urban	29	Female	Dubois2017	NA	NA	77934	illumina	v4	515F 786R
X2605OctC	M05	human	adult	Montreal	urban	29	Female	Dubois2017	NA	NA	40817	illumina	v4	515F 786R
X2605OctP	M05	human	adult	Montreal	urban	29	Female	Dubois2017	NA	NA	99784	illumina	v4	515F 786R
X2606Nov	M06	human	adult	Montreal	urban	25	Male	Dubois2017	NA	NA	93931	illumina	v4	515F 786R
X2606OctC	M06	human	adult	Montreal	urban	25	Male	Dubois2017	NA	NA	101161	illumina	v4	515F 786R
X2606OctP	M06	human	adult	Montreal	urban	25	Male	Dubois2017	NA	NA	52795	illumina	v4	515F 786R
X2607Dec	M07	human	adult	Montreal	urban	26	Female	Dubois2017	NA	NA	108081	illumina	v4	515F 786R
X2607Jan	M07	human	adult	Montreal	urban	26	Female	Dubois2017	NA	NA	118527	illumina	v4	515F 786R
X2607Nov	M07	human	adult	Montreal	urban	26	Female	Dubois2017	NA	NA	105017	illumina	v4	515F 786R
X2609Dec	M08	human	adult	Montreal	urban	34	Male	Dubois2017	NA	NA	81196	illumina	v4	515F 786R
X2609Jan	M08	human	adult	Montreal	urban	34	Male	Dubois2017	NA	NA	83487	illumina	v4	515F 786R
X2609Nov	M08	human	adult	Montreal	urban	34	Male	Dubois2017	NA	NA	88857	illumina	v4	515F 786R
X2609OctC	M08	human	adult	Montreal	urban	34	Male	Dubois2017	NA	NA	37413	illumina	v4	515F 786R
X2609OctP	M08	human	adult	Montreal	urban	34	Male	Dubois2017	NA	NA	79500	illumina	v4	515F 786R
X2610Dec	M09	human	adult	Montreal	urban	26	Male	Dubois2017	NA	NA	56165	illumina	v4	515F 786R
X2610Jan	M09	human	adult	Montreal	urban	26	Male	Dubois2017	NA	NA	44175	illumina	v4	515F 786R
X2610Nov	M09	human	adult	Montreal	urban	26	Male	Dubois2017	NA	NA	88655	illumina	v4	515F 786R
X2610OctP	M09	human	adult	Montreal	urban	26	Male	Dubois2017	NA	NA	60260	illumina	v4	515F 786R
X222607octc	M07	human	adult	Montreal	urban	26	Female	Dubois2017	NA	NA	59862	illumina	v4	515F 786R
X22501juil1c	N01	human	adult	Nunavut	rural_arctic	37	Male	Dubois2017	NA	NA	95707	illumina	v4	515F 786R
X22501juil1p	N01	human	adult	Nunavut	rural_arctic	37	Male	Dubois2017	NA	NA	70259	illumina	v4	515F 786R
X22503juil2	N03	human	adult	Nunavut	rural_arctic	58	Male	Dubois2017	NA	NA	34698	illumina	v4	515F 786R
X22503juilc16	N03	human	adult	Nunavut	rural_arctic	58	Male	Dubois2017	NA	NA	59952	illumina	v4	515F 786R
X22503juilp16	N03	human	adult	Nunavut	rural_arctic	58	Male	Dubois2017	NA	NA	30575	illumina	v4	515F 786R
X22504avril	N04	human	adult	Nunavut	rural_arctic	60	Female	Dubois2017	NA	NA	30602	illumina	v4	515F 786R
X22504dec	N04	human	adult	Nunavut	rural_arctic	60	Female	Dubois2017	NA	NA	33199	illumina	v4	515F 786R
X22504fev	N04	human	adult	Nunavut	rural_arctic	60	Female	Dubois2017	NA	NA	47101	illumina	v4	515F 786R
X22504jan	N04	human	adult	Nunavut	rural_arctic	60	Female	Dubois2017	NA	NA	30682	illumina	v4	515F 786R
X22504juilc16	N04	human	adult	Nunavut	rural_arctic	60	Female	Dubois2017	NA	NA	23429	illumina	v4	515F 786R
X22504juilp16	N04	human	adult	Nunavut	rural_arctic	60	Female	Dubois2017	NA	NA	42764	illumina	v4	515F 786R
X22504mai	N04	human	adult	Nunavut	rural_arctic	60	Female	Dubois2017	NA	NA	42550	illumina	v4	515F 786R
X22504mars	N04	human	adult	Nunavut	rural_arctic	60	Female	Dubois2017	NA	NA	23580	illumina	v4	515F 786R
X22504nov	N04	human	adult	Nunavut	rural_arctic	60	Female	Dubois2017	NA	NA	18082	illumina	v4	515F 786R
X22504sept	N04	human	adult	Nunavut	rural_arctic	60	Female	Dubois2017	NA	NA	20487	illumina	v4	515F 786R
X22505juil2	N05	human	adult	Nunavut	rural_arctic	63	Female	Dubois2017	NA	NA	40909	illumina	v4	515F 786R
X22506juilc16	N06	human	adult	Nunavut	rural_arctic	42	Female	Dubois2017	NA	NA	34785	illumina	v4	515F 786R
X22506juilp16	N06	human	adult	Nunavut	rural_arctic	42	Female	Dubois2017	NA	NA	34311	illumina	v4	515F 786R
X22506oct	N06	human	adult	Nunavut	rural_arctic	42	Female	Dubois2017	NA	NA	38248	illumina	v4	515F 786R
X22507aout	N07	human	adult	Nunavut	rural_arctic	67	Female	Dubois2017	NA	NA	93368	illumina	v4	515F 786R
X22507dec	N07	human	adult	Nunavut	rural_arctic	67	Female	Dubois2017	NA	NA	38821	illumina	v4	515F 786R
X22507juil1p	N07	human	adult	Nunavut	rural_arctic	67	Female	Dubois2017	NA	NA	38947	illumina	v4	515F 786R
X22507juilc16	N07	human	adult	Nunavut	rural_arctic	67	Female	Dubois2017	NA	NA	22294	illumina	v4	515F 786R
X22507juilp16	N07	human	adult	Nunavut	rural_arctic	67	Female	Dubois2017	NA	NA	37745	illumina	v4	515F 786R
X22507nov	N07	human	adult	Nunavut	rural_arctic	67	Female	Dubois2017	NA	NA	71135	illumina	v4	515F 786R
X22508jan	N08	human	adult	Nunavut	rural_arctic	37	Female	Dubois2017	NA	NA	51105	illumina	v4	515F 786R
X22508juil2	N08	human	adult	Nunavut	rural_arctic	37	Female	Dubois2017	NA	NA	19288	illumina	v4	515F 786R
X22508juilc16	N08	human	adult	Nunavut	rural_arctic	37	Female	Dubois2017	NA	NA	37127	illumina	v4	515F 786R
X22508juilp16	N08	human	adult	Nunavut	rural_arctic	37	Female	Dubois2017	NA	NA	33583	illumina	v4	515F 786R
X22510aout	N10	human	adult	Nunavut	rural_arctic	56	Female	Dubois2017	NA	NA	82908	illumina	v4	515F 786R
X22510fev	N10	human	adult	Nunavut	rural_arctic	56	Female	Dubois2017	NA	NA	39933	illumina	v4	515F 786R
X22510jan	N10	human	adult	Nunavut	rural_arctic	56	Female	Dubois2017	NA	NA	49043	illumina	v4	515F 786R
X22510juilc16	N10	human	adult	Nunavut	rural_arctic	56	Female	Dubois2017	NA	NA	47203	illumina	v4	515F 786R
X22510juilp16	N10	human	adult	Nunavut	rural_arctic	56	Female	Dubois2017	NA	NA	29166	illumina	v4	515F 786R
X22510oct	N10	human	adult	Nunavut	rural_arctic	56	Female	Dubois2017	NA	NA	36184	illumina	v4	515F 786R
X22511juil1c	N11	human	adult	Nunavut	rural_arctic	39	Female	Dubois2017	NA	NA	17154	illumina	v4	515F 786R
X22512juil2	N12	human	adult	Nunavut	rural_arctic	65	Male	Dubois2017	NA	NA	53502	illumina	v4	515F 786R
X22515juil2	N15	human	adult	Nunavut	rural_arctic	36	Female	Dubois2017	NA	NA	31342	illumina	v4	515F 786R
X22515juilc16	N15	human	adult	Nunavut	rural_arctic	36	Female	Dubois2017	NA	NA	39940	illumina	v4	515F 786R
X22515juilp16	N15	human	adult	Nunavut	rural_arctic	36	Female	Dubois2017	NA	NA	41779	illumina	v4	515F 786R
X22601avril	M01	human	adult	Montreal	urban	23	Female	Dubois2017	NA	NA	42661	illumina	v4	515F 786R
X22601fev	M01	human	adult	Montreal	urban	23	Female	Dubois2017	NA	NA	79522	illumina	v4	515F 786R
X22601jan	M01	human	adult	Montreal	urban	23	Female	Dubois2017	NA	NA	31618	illumina	v4	515F 786R
X22601mai	M01	human	adult	Montreal	urban	23	Female	Dubois2017	NA	NA	37059	illumina	v4	515F 786R
X22601mars	M01	human	adult	Montreal	urban	23	Female	Dubois2017	NA	NA	32518	illumina	v4	515F 786R
X22602avril	M02	human	adult	Montreal	urban	24	Female	Dubois2017	NA	NA	45602	illumina	v4	515F 786R
X22602fev	M02	human	adult	Montreal	urban	24	Female	Dubois2017	NA	NA	68953	illumina	v4	515F 786R
X22602mai	M02	human	adult	Montreal	urban	24	Female	Dubois2017	NA	NA	70678	illumina	v4	515F 786R
X22602mars	M02	human	adult	Montreal	urban	24	Female	Dubois2017	NA	NA	14631	illumina	v4	515F 786R
X22602nov	M02	human	adult	Montreal	urban	24	Female	Dubois2017	NA	NA	43682	illumina	v4	515F 786R
X22602octc	M02	human	adult	Montreal	urban	24	Female	Dubois2017	NA	NA	103214	illumina	v4	515F 786R
X22603avril	M03	human	adult	Montreal	urban	48	Male	Dubois2017	NA	NA	16010	illumina	v4	515F 786R
X22603fev	M03	human	adult	Montreal	urban	48	Male	Dubois2017	NA	NA	83719	illumina	v4	515F 786R
X22603jan	M03	human	adult	Montreal	urban	48	Male	Dubois2017	NA	NA	33147	illumina	v4	515F 786R
X22603mai	M03	human	adult	Montreal	urban	48	Male	Dubois2017	NA	NA	54303	illumina	v4	515F 786R
X22603mars	M03	human	adult	Montreal	urban	48	Male	Dubois2017	NA	NA	14727	illumina	v4	515F 786R
X22604avril	M04	human	adult	Montreal	urban	37	Male	Dubois2017	NA	NA	22723	illumina	v4	515F 786R
X22604fev	M04	human	adult	Montreal	urban	37	Male	Dubois2017	NA	NA	44841	illumina	v4	515F 786R
X22604jan	M04	human	adult	Montreal	urban	37	Male	Dubois2017	NA	NA	16139	illumina	v4	515F 786R
X22604mai	M04	human	adult	Montreal	urban	37	Male	Dubois2017	NA	NA	20182	illumina	v4	515F 786R
X22604mars	M04	human	adult	Montreal	urban	37	Male	Dubois2017	NA	NA	35195	illumina	v4	515F 786R
X22605avril	M05	human	adult	Montreal	urban	29	Female	Dubois2017	NA	NA	60742	illumina	v4	515F 786R
X22605fev	M05	human	adult	Montreal	urban	29	Female	Dubois2017	NA	NA	20023	illumina	v4	515F 786R
X22605jan	M05	human	adult	Montreal	urban	29	Female	Dubois2017	NA	NA	63297	illumina	v4	515F 786R
X22605mai	M05	human	adult	Montreal	urban	29	Female	Dubois2017	NA	NA	37540	illumina	v4	515F 786R
X22605mars	M05	human	adult	Montreal	urban	29	Female	Dubois2017	NA	NA	29116	illumina	v4	515F 786R
X22606fev	M06	human	adult	Montreal	urban	25	Male	Dubois2017	NA	NA	25456	illumina	v4	515F 786R
X22606jan	M06	human	adult	Montreal	urban	25	Male	Dubois2017	NA	NA	14126	illumina	v4	515F 786R
X22606mars	M06	human	adult	Montreal	urban	25	Male	Dubois2017	NA	NA	15201	illumina	v4	515F 786R
X22607avril	M07	human	adult	Montreal	urban	26	Female	Dubois2017	NA	NA	16059	illumina	v4	515F 786R
X22607fev	M07	human	adult	Montreal	urban	26	Female	Dubois2017	NA	NA	23312	illumina	v4	515F 786R
X22607mai	M07	human	adult	Montreal	urban	26	Female	Dubois2017	NA	NA	24209	illumina	v4	515F 786R
X22607mars	M07	human	adult	Montreal	urban	26	Female	Dubois2017	NA	NA	19455	illumina	v4	515F 786R
X22607octp	M07	human	adult	Montreal	urban	26	Female	Dubois2017	NA	NA	71488	illumina	v4	515F 786R
X22609avril	M08	human	adult	Montreal	urban	34	Male	Dubois2017	NA	NA	54400	illumina	v4	515F 786R
X22609fev	M08	human	adult	Montreal	urban	34	Male	Dubois2017	NA	NA	27040	illumina	v4	515F 786R
X22609mai	M08	human	adult	Montreal	urban	34	Male	Dubois2017	NA	NA	54599	illumina	v4	515F 786R
X22609mars	M08	human	adult	Montreal	urban	34	Male	Dubois2017	NA	NA	36124	illumina	v4	515F 786R
X22610avril	M09	human	adult	Montreal	urban	26	Male	Dubois2017	NA	NA	24977	illumina	v4	515F 786R
X22610fev	M09	human	adult	Montreal	urban	26	Male	Dubois2017	NA	NA	48180	illumina	v4	515F 786R
X22610mai	M09	human	adult	Montreal	urban	26	Male	Dubois2017	NA	NA	33901	illumina	v4	515F 786R
X22610mars	M09	human	adult	Montreal	urban	26	Male	Dubois2017	NA	NA	17583	illumina	v4	515F 786R
X22610octc	M09	human	adult	Montreal	urban	26	Male	Dubois2017	NA	NA	47675	illumina	v4	515F 786R
bonobo187	NA	bonobo	adult	LA	wild	NA	NA	Moeller2014	NA	NA	44468	illumina	v4	515F 806R
bonobo188	NA	bonobo	adult	LA	wild	NA	NA	Moeller2014	NA	NA	46652	illumina	v4	515F 806R
bonobo189	NA	bonobo	adult	LA	wild	NA	NA	Moeller2014	NA	NA	42814	illumina	v4	515F 806R
bonobo190	NA	bonobo	adult	LA	wild	NA	NA	Moeller2014	NA	NA	23982	illumina	v4	515F 806R
bonobo191	NA	bonobo	adult	LA	wild	NA	NA	Moeller2014	NA	NA	35182	illumina	v4	515F 806R
bonobo192	NA	bonobo	adult	LA	wild	NA	NA	Moeller2014	NA	NA	38990	illumina	v4	515F 806R
bonobo193	NA	bonobo	adult	LA	wild	NA	NA	Moeller2014	NA	NA	36141	illumina	v4	515F 806R
bonobo194	NA	bonobo	adult	LA	wild	NA	NA	Moeller2014	NA	NA	62769	illumina	v4	515F 806R
bonobo195	NA	bonobo	adult	LA	wild	NA	NA	Moeller2014	NA	NA	31482	illumina	v4	515F 806R
bonobo196	NA	bonobo	adult	LA	wild	NA	NA	Moeller2014	NA	NA	25468	illumina	v4	515F 806R
bonobo197	NA	bonobo	adult	LA	wild	NA	NA	Moeller2014	NA	NA	29368	illumina	v4	515F 806R
bonobo198	NA	bonobo	adult	LA	wild	NA	NA	Moeller2014	NA	NA	34773	illumina	v4	515F 806R
bonobo199	NA	bonobo	adult	LA	wild	NA	NA	Moeller2014	NA	NA	32057	illumina	v4	515F 806R
bonobo200	NA	bonobo	adult	LA	wild	NA	NA	Moeller2014	NA	NA	28597	illumina	v4	515F 806R
bonobo201	NA	bonobo	adult	LA	wild	NA	NA	Moeller2014	NA	NA	41389	illumina	v4	515F 806R
bonobo202	NA	bonobo	adult	LA	wild	NA	NA	Moeller2014	NA	NA	24065	illumina	v4	515F 806R
bonobo203	NA	bonobo	adult	LA	wild	NA	NA	Moeller2014	NA	NA	28539	illumina	v4	515F 806R
bonobo204	NA	bonobo	adult	LA	wild	NA	NA	Moeller2014	NA	NA	42745	illumina	v4	515F 806R
bonobo205	NA	bonobo	adult	LA	wild	NA	NA	Moeller2014	NA	NA	22263	illumina	v4	515F 806R
bonobo206	NA	bonobo	adult	LA	wild	NA	NA	Moeller2014	NA	NA	33071	illumina	v4	515F 806R
bonobo207	NA	bonobo	adult	ML	wild	NA	NA	Moeller2014	NA	NA	31435	illumina	v4	515F 806R
bonobo208	NA	bonobo	adult	ML	wild	NA	NA	Moeller2014	NA	NA	28713	illumina	v4	515F 806R
bonobo209	NA	bonobo	adult	ML	wild	NA	NA	Moeller2014	NA	NA	19033	illumina	v4	515F 806R
bonobo210	NA	bonobo	adult	ML	wild	NA	NA	Moeller2014	NA	NA	18170	illumina	v4	515F 806R
bonobo211	NA	bonobo	adult	ML	wild	NA	NA	Moeller2014	NA	NA	45263	illumina	v4	515F 806R
bonobo212	NA	bonobo	adult	ML	wild	NA	NA	Moeller2014	NA	NA	40456	illumina	v4	515F 806R
bonobo213	NA	bonobo	adult	ML	wild	NA	NA	Moeller2014	NA	NA	41119	illumina	v4	515F 806R
bonobo214	NA	bonobo	adult	ML	wild	NA	NA	Moeller2014	NA	NA	26499	illumina	v4	515F 806R
bonobo215	NA	bonobo	adult	ML	wild	NA	NA	Moeller2014	NA	NA	21810	illumina	v4	515F 806R
bonobo216	NA	bonobo	adult	ML	wild	NA	NA	Moeller2014	NA	NA	20807	illumina	v4	515F 806R
bonobo217	NA	bonobo	adult	ML	wild	NA	NA	Moeller2014	NA	NA	33992	illumina	v4	515F 806R
bonobo218	NA	bonobo	adult	ML	wild	NA	NA	Moeller2014	NA	NA	34045	illumina	v4	515F 806R
bonobo219	NA	bonobo	adult	ML	wild	NA	NA	Moeller2014	NA	NA	31283	illumina	v4	515F 806R
bonobo220	NA	bonobo	adult	ML	wild	NA	NA	Moeller2014	NA	NA	43395	illumina	v4	515F 806R
bonobo221	NA	bonobo	adult	ML	wild	NA	NA	Moeller2014	NA	NA	41113	illumina	v4	515F 806R
bonobo222	NA	bonobo	adult	ML	wild	NA	NA	Moeller2014	NA	NA	27561	illumina	v4	515F 806R
bonobo223	NA	bonobo	adult	ML	wild	NA	NA	Moeller2014	NA	NA	25604	illumina	v4	515F 806R
bonobo224	NA	bonobo	adult	ML	wild	NA	NA	Moeller2014	NA	NA	37638	illumina	v4	515F 806R
bonobo225	NA	bonobo	adult	ML	wild	NA	NA	Moeller2014	NA	NA	30082	illumina	v4	515F 806R
bonobo226	NA	bonobo	adult	ML	wild	NA	NA	Moeller2014	NA	NA	32674	illumina	v4	515F 806R
bonobo227	NA	bonobo	adult	ML	wild	NA	NA	Moeller2014	NA	NA	4359	illumina	v4	515F 806R
bonobo228	NA	bonobo	adult	ML	wild	NA	NA	Moeller2014	NA	NA	38299	illumina	v4	515F 806R
bonobo229	NA	bonobo	adult	ML	wild	NA	NA	Moeller2014	NA	NA	25241	illumina	v4	515F 806R
bonobo230	NA	bonobo	adult	ML	wild	NA	NA	Moeller2014	NA	NA	34123	illumina	v4	515F 806R
bonobo231	NA	bonobo	adult	ML	wild	NA	NA	Moeller2014	NA	NA	31921	illumina	v4	515F 806R
bonobo232	NA	bonobo	adult	ML	wild	NA	NA	Moeller2014	NA	NA	29834	illumina	v4	515F 806R
bonobo233	NA	bonobo	adult	ML	wild	NA	NA	Moeller2014	NA	NA	48239	illumina	v4	515F 806R
bonobo234	NA	bonobo	adult	ML	wild	NA	NA	Moeller2014	NA	NA	36040	illumina	v4	515F 806R
bonobo235	NA	bonobo	adult	ML	wild	NA	NA	Moeller2014	NA	NA	44351	illumina	v4	515F 806R
bonobo236	NA	bonobo	adult	ML	wild	NA	NA	Moeller2014	NA	NA	53685	illumina	v4	515F 806R
bonobo237	NA	bonobo	adult	ML	wild	NA	NA	Moeller2014	NA	NA	31419	illumina	v4	515F 806R
bonobo238	NA	bonobo	adult	ML	wild	NA	NA	Moeller2014	NA	NA	37775	illumina	v4	515F 806R
bonobo239	NA	bonobo	adult	ML	wild	NA	NA	Moeller2014	NA	NA	38987	illumina	v4	515F 806R
bonobo240	NA	bonobo	adult	ML	wild	NA	NA	Moeller2014	NA	NA	39424	illumina	v4	515F 806R
bonobo241	NA	bonobo	adult	ML	wild	NA	NA	Moeller2014	NA	NA	37515	illumina	v4	515F 806R
bonobo242	NA	bonobo	adult	ML	wild	NA	NA	Moeller2014	NA	NA	33658	illumina	v4	515F 806R
bonobo243	NA	bonobo	adult	ML	wild	NA	NA	Moeller2014	NA	NA	41881	illumina	v4	515F 806R
bonobo244	NA	bonobo	adult	ML	wild	NA	NA	Moeller2014	NA	NA	41870	illumina	v4	515F 806R
bonobo245	NA	bonobo	adult	ML	wild	NA	NA	Moeller2014	NA	NA	35627	illumina	v4	515F 806R
bonobo246	NA	bonobo	adult	ML	wild	NA	NA	Moeller2014	NA	NA	24097	illumina	v4	515F 806R
bonobo247	NA	bonobo	adult	ML	wild	NA	NA	Moeller2014	NA	NA	18731	illumina	v4	515F 806R
bonobo248	NA	bonobo	adult	ML	wild	NA	NA	Moeller2014	NA	NA	26615	illumina	v4	515F 806R
bonobo249	NA	bonobo	adult	ML	wild	NA	NA	Moeller2014	NA	NA	26902	illumina	v4	515F 806R
bonobo250	NA	bonobo	adult	ML	wild	NA	NA	Moeller2014	NA	NA	22628	illumina	v4	515F 806R
bonobo251	NA	bonobo	adult	ML	wild	NA	NA	Moeller2014	NA	NA	22625	illumina	v4	515F 806R
bonobo252	NA	bonobo	adult	ML	wild	NA	NA	Moeller2014	NA	NA	29345	illumina	v4	515F 806R
bonobo253	NA	bonobo	adult	ML	wild	NA	NA	Moeller2014	NA	NA	29190	illumina	v4	515F 806R
bonobo254	NA	bonobo	adult	ML	wild	NA	NA	Moeller2014	NA	NA	30560	illumina	v4	515F 806R
bonobo255	NA	bonobo	adult	ML	wild	NA	NA	Moeller2014	NA	NA	27422	illumina	v4	515F 806R
bonobo256	NA	bonobo	adult	ML	wild	NA	NA	Moeller2014	NA	NA	37469	illumina	v4	515F 806R
chimp100	NA	chimp	adult	gombe	wild	NA	NA	Moeller2014	NA	NA	100492	illumina	v4	515F 806R
chimp101	NA	chimp	adult	gombe	wild	NA	NA	Moeller2014	NA	NA	71056	illumina	v4	515F 806R
chimp102	NA	chimp	adult	gombe	wild	NA	NA	Moeller2014	NA	NA	73605	illumina	v4	515F 806R
chimp103	NA	chimp	adult	gombe	wild	NA	NA	Moeller2014	NA	NA	83992	illumina	v4	515F 806R
chimp104	NA	chimp	adult	gombe	wild	NA	NA	Moeller2014	NA	NA	83727	illumina	v4	515F 806R
chimp105	NA	chimp	adult	gombe	wild	NA	NA	Moeller2014	NA	NA	77071	illumina	v4	515F 806R
chimp106	NA	chimp	adult	gombe	wild	NA	NA	Moeller2014	NA	NA	78090	illumina	v4	515F 806R
chimp107	NA	chimp	adult	gombe	wild	NA	NA	Moeller2014	NA	NA	64640	illumina	v4	515F 806R
chimp108	NA	chimp	adult	gombe	wild	NA	NA	Moeller2014	NA	NA	56086	illumina	v4	515F 806R
chimp109	NA	chimp	adult	gombe	wild	NA	NA	Moeller2014	NA	NA	61673	illumina	v4	515F 806R
chimp110	NA	chimp	adult	gombe	wild	NA	NA	Moeller2014	NA	NA	68731	illumina	v4	515F 806R
chimp111	NA	chimp	adult	gombe	wild	NA	NA	Moeller2014	NA	NA	62984	illumina	v4	515F 806R
chimp112	NA	chimp	adult	gombe	wild	NA	NA	Moeller2014	NA	NA	68986	illumina	v4	515F 806R
chimp113	NA	chimp	adult	gombe	wild	NA	NA	Moeller2014	NA	NA	60150	illumina	v4	515F 806R
chimp114	NA	chimp	adult	gombe	wild	NA	NA	Moeller2014	NA	NA	46407	illumina	v4	515F 806R
chimp115	NA	chimp	adult	gombe	wild	NA	NA	Moeller2014	NA	NA	66895	illumina	v4	515F 806R
chimp116	NA	chimp	adult	gombe	wild	NA	NA	Moeller2014	NA	NA	74150	illumina	v4	515F 806R
chimp117	NA	chimp	adult	gombe	wild	NA	NA	Moeller2014	NA	NA	57423	illumina	v4	515F 806R
chimp118	NA	chimp	adult	gombe	wild	NA	NA	Moeller2014	NA	NA	54305	illumina	v4	515F 806R
chimp119	NA	chimp	adult	gombe	wild	NA	NA	Moeller2014	NA	NA	62288	illumina	v4	515F 806R
chimp120	NA	chimp	adult	gombe	wild	NA	NA	Moeller2014	NA	NA	60575	illumina	v4	515F 806R
chimp121	NA	chimp	adult	gombe	wild	NA	NA	Moeller2014	NA	NA	66097	illumina	v4	515F 806R
chimp122	NA	chimp	adult	gombe	wild	NA	NA	Moeller2014	NA	NA	58174	illumina	v4	515F 806R
chimp123	NA	chimp	adult	gombe	wild	NA	NA	Moeller2014	NA	NA	52113	illumina	v4	515F 806R
chimp124	NA	chimp	adult	gombe	wild	NA	NA	Moeller2014	NA	NA	77320	illumina	v4	515F 806R
chimp125	NA	chimp	adult	gombe	wild	NA	NA	Moeller2014	NA	NA	68259	illumina	v4	515F 806R
chimp126	NA	chimp	adult	gombe	wild	NA	NA	Moeller2014	NA	NA	53617	illumina	v4	515F 806R
chimp127	NA	chimp	adult	gombe	wild	NA	NA	Moeller2014	NA	NA	120602	illumina	v4	515F 806R
chimp128	NA	chimp	adult	gombe	wild	NA	NA	Moeller2014	NA	NA	62888	illumina	v4	515F 806R
chimp129	NA	chimp	adult	gombe	wild	NA	NA	Moeller2014	NA	NA	82048	illumina	v4	515F 806R
chimp130	NA	chimp	adult	gombe	wild	NA	NA	Moeller2014	NA	NA	81884	illumina	v4	515F 806R
chimp131	NA	chimp	adult	gombe	wild	NA	NA	Moeller2014	NA	NA	182362	illumina	v4	515F 806R
chimp132	NA	chimp	adult	gombe	wild	NA	NA	Moeller2014	NA	NA	90235	illumina	v4	515F 806R
chimp133	NA	chimp	adult	gombe	wild	NA	NA	Moeller2014	NA	NA	1680	illumina	v4	515F 806R
chimp89	NA	chimp	adult	gombe	wild	NA	NA	Moeller2014	NA	NA	72463	illumina	v4	515F 806R
chimp90	NA	chimp	adult	gombe	wild	NA	NA	Moeller2014	NA	NA	112467	illumina	v4	515F 806R
chimp91	NA	chimp	adult	gombe	wild	NA	NA	Moeller2014	NA	NA	98702	illumina	v4	515F 806R
chimp92	NA	chimp	adult	gombe	wild	NA	NA	Moeller2014	NA	NA	101113	illumina	v4	515F 806R
chimp93	NA	chimp	adult	gombe	wild	NA	NA	Moeller2014	NA	NA	82103	illumina	v4	515F 806R
chimp94	NA	chimp	adult	gombe	wild	NA	NA	Moeller2014	NA	NA	103314	illumina	v4	515F 806R
chimp95	NA	chimp	adult	gombe	wild	NA	NA	Moeller2014	NA	NA	117655	illumina	v4	515F 806R
chimp96	NA	chimp	adult	gombe	wild	NA	NA	Moeller2014	NA	NA	92948	illumina	v4	515F 806R
chimp97	NA	chimp	adult	gombe	wild	NA	NA	Moeller2014	NA	NA	92596	illumina	v4	515F 806R
chimp98	NA	chimp	adult	gombe	wild	NA	NA	Moeller2014	NA	NA	92350	illumina	v4	515F 806R
chimp99	NA	chimp	adult	gombe	wild	NA	NA	Moeller2014	NA	NA	80626	illumina	v4	515F 806R
gorilla10	NA	gorilla	adult	campo	wild	NA	NA	Moeller2014	NA	NA	24396	illumina	v4	515F 806R
gorilla100	NA	gorilla	adult	campo	wild	NA	NA	Moeller2014	NA	NA	32649	illumina	v4	515F 806R
gorilla101	NA	gorilla	adult	campo	wild	NA	NA	Moeller2014	NA	NA	10943	illumina	v4	515F 806R
gorilla102	NA	gorilla	adult	campo	wild	NA	NA	Moeller2014	NA	NA	23878	illumina	v4	515F 806R
gorilla103	NA	gorilla	adult	campo	wild	NA	NA	Moeller2014	NA	NA	30140	illumina	v4	515F 806R
gorilla104	NA	gorilla	adult	campo	wild	NA	NA	Moeller2014	NA	NA	26453	illumina	v4	515F 806R
gorilla105	NA	gorilla	adult	campo	wild	NA	NA	Moeller2014	NA	NA	22330	illumina	v4	515F 806R
gorilla106	NA	gorilla	adult	campo	wild	NA	NA	Moeller2014	NA	NA	15024	illumina	v4	515F 806R
gorilla107	NA	gorilla	adult	campo	wild	NA	NA	Moeller2014	NA	NA	35091	illumina	v4	515F 806R
gorilla108	NA	gorilla	adult	campo	wild	NA	NA	Moeller2014	NA	NA	41910	illumina	v4	515F 806R
gorilla109	NA	gorilla	adult	campo	wild	NA	NA	Moeller2014	NA	NA	44035	illumina	v4	515F 806R
gorilla110	NA	gorilla	adult	campo	wild	NA	NA	Moeller2014	NA	NA	27014	illumina	v4	515F 806R
gorilla111	NA	gorilla	adult	campo	wild	NA	NA	Moeller2014	NA	NA	37278	illumina	v4	515F 806R
gorilla112	NA	gorilla	adult	campo	wild	NA	NA	Moeller2014	NA	NA	36485	illumina	v4	515F 806R
gorilla113	NA	gorilla	adult	campo	wild	NA	NA	Moeller2014	NA	NA	31927	illumina	v4	515F 806R
gorilla114	NA	gorilla	adult	campo	wild	NA	NA	Moeller2014	NA	NA	28978	illumina	v4	515F 806R
gorilla115	NA	gorilla	adult	campo	wild	NA	NA	Moeller2014	NA	NA	35772	illumina	v4	515F 806R
gorilla116	NA	gorilla	adult	campo	wild	NA	NA	Moeller2014	NA	NA	38365	illumina	v4	515F 806R
gorilla117	NA	gorilla	adult	campo	wild	NA	NA	Moeller2014	NA	NA	31563	illumina	v4	515F 806R
gorilla118	NA	gorilla	adult	campo	wild	NA	NA	Moeller2014	NA	NA	34183	illumina	v4	515F 806R
gorilla119	NA	gorilla	adult	campo	wild	NA	NA	Moeller2014	NA	NA	30270	illumina	v4	515F 806R
gorilla12	NA	gorilla	adult	campo	wild	NA	NA	Moeller2014	NA	NA	24820	illumina	v4	515F 806R
gorilla120	NA	gorilla	adult	campo	wild	NA	NA	Moeller2014	NA	NA	24691	illumina	v4	515F 806R
gorilla121	NA	gorilla	adult	campo	wild	NA	NA	Moeller2014	NA	NA	24362	illumina	v4	515F 806R
gorilla122	NA	gorilla	adult	belgique	wild	NA	NA	Moeller2014	NA	NA	15328	illumina	v4	515F 806R
gorilla123	NA	gorilla	adult	belgique	wild	NA	NA	Moeller2014	NA	NA	16271	illumina	v4	515F 806R
gorilla124	NA	gorilla	adult	belgique	wild	NA	NA	Moeller2014	NA	NA	11383	illumina	v4	515F 806R
gorilla125	NA	gorilla	adult	belgique	wild	NA	NA	Moeller2014	NA	NA	28368	illumina	v4	515F 806R
gorilla126	NA	gorilla	adult	belgique	wild	NA	NA	Moeller2014	NA	NA	26991	illumina	v4	515F 806R
gorilla127	NA	gorilla	adult	belgique	wild	NA	NA	Moeller2014	NA	NA	32910	illumina	v4	515F 806R
gorilla128	NA	gorilla	adult	belgique	wild	NA	NA	Moeller2014	NA	NA	32691	illumina	v4	515F 806R
gorilla129	NA	gorilla	adult	belgique	wild	NA	NA	Moeller2014	NA	NA	20270	illumina	v4	515F 806R
gorilla13	NA	gorilla	adult	campo	wild	NA	NA	Moeller2014	NA	NA	34828	illumina	v4	515F 806R
gorilla130	NA	gorilla	adult	belgique	wild	NA	NA	Moeller2014	NA	NA	36087	illumina	v4	515F 806R
gorilla131	NA	gorilla	adult	belgique	wild	NA	NA	Moeller2014	NA	NA	33896	illumina	v4	515F 806R
gorilla132	NA	gorilla	adult	djoum	wild	NA	NA	Moeller2014	NA	NA	11349	illumina	v4	515F 806R
gorilla133	NA	gorilla	adult	djoum	wild	NA	NA	Moeller2014	NA	NA	24211	illumina	v4	515F 806R
gorilla134	NA	gorilla	adult	djoum	wild	NA	NA	Moeller2014	NA	NA	32066	illumina	v4	515F 806R
gorilla135	NA	gorilla	adult	djoum	wild	NA	NA	Moeller2014	NA	NA	16337	illumina	v4	515F 806R
gorilla136	NA	gorilla	adult	djoum	wild	NA	NA	Moeller2014	NA	NA	26960	illumina	v4	515F 806R
gorilla137	NA	gorilla	adult	djoum	wild	NA	NA	Moeller2014	NA	NA	14651	illumina	v4	515F 806R
gorilla138	NA	gorilla	adult	djoum	wild	NA	NA	Moeller2014	NA	NA	50915	illumina	v4	515F 806R
gorilla139	NA	gorilla	adult	djoum	wild	NA	NA	Moeller2014	NA	NA	26142	illumina	v4	515F 806R
gorilla14	NA	gorilla	adult	campo	wild	NA	NA	Moeller2014	NA	NA	33773	illumina	v4	515F 806R
gorilla140	NA	gorilla	adult	djoum	wild	NA	NA	Moeller2014	NA	NA	39412	illumina	v4	515F 806R
gorilla141	NA	gorilla	adult	djoum	wild	NA	NA	Moeller2014	NA	NA	45467	illumina	v4	515F 806R
gorilla142	NA	gorilla	adult	djoum	wild	NA	NA	Moeller2014	NA	NA	33834	illumina	v4	515F 806R
gorilla143	NA	gorilla	adult	djoum	wild	NA	NA	Moeller2014	NA	NA	21366	illumina	v4	515F 806R
gorilla144	NA	gorilla	adult	djoum	wild	NA	NA	Moeller2014	NA	NA	34192	illumina	v4	515F 806R
gorilla145	NA	gorilla	adult	djoum	wild	NA	NA	Moeller2014	NA	NA	30457	illumina	v4	515F 806R
gorilla146	NA	gorilla	adult	djoum	wild	NA	NA	Moeller2014	NA	NA	35220	illumina	v4	515F 806R
gorilla147	NA	gorilla	adult	djoum	wild	NA	NA	Moeller2014	NA	NA	36471	illumina	v4	515F 806R
gorilla148	NA	gorilla	adult	djoum	wild	NA	NA	Moeller2014	NA	NA	50252	illumina	v4	515F 806R
gorilla149	NA	gorilla	adult	djoum	wild	NA	NA	Moeller2014	NA	NA	32839	illumina	v4	515F 806R
gorilla15	NA	gorilla	adult	campo	wild	NA	NA	Moeller2014	NA	NA	14766	illumina	v4	515F 806R
gorilla150	NA	gorilla	adult	djoum	wild	NA	NA	Moeller2014	NA	NA	20228	illumina	v4	515F 806R
gorilla151	NA	gorilla	adult	djoum	wild	NA	NA	Moeller2014	NA	NA	24818	illumina	v4	515F 806R
gorilla152	NA	gorilla	adult	djoum	wild	NA	NA	Moeller2014	NA	NA	26376	illumina	v4	515F 806R
gorilla153	NA	gorilla	adult	djoum	wild	NA	NA	Moeller2014	NA	NA	50393	illumina	v4	515F 806R
gorilla154	NA	gorilla	adult	djoum	wild	NA	NA	Moeller2014	NA	NA	24932	illumina	v4	515F 806R
gorilla155	NA	gorilla	adult	djoum	wild	NA	NA	Moeller2014	NA	NA	22662	illumina	v4	515F 806R
gorilla156	NA	gorilla	adult	djoum	wild	NA	NA	Moeller2014	NA	NA	21162	illumina	v4	515F 806R
gorilla157	NA	gorilla	adult	djoum	wild	NA	NA	Moeller2014	NA	NA	22487	illumina	v4	515F 806R
gorilla158	NA	gorilla	adult	djoum	wild	NA	NA	Moeller2014	NA	NA	26452	illumina	v4	515F 806R
gorilla159	NA	gorilla	adult	djoum	wild	NA	NA	Moeller2014	NA	NA	38557	illumina	v4	515F 806R
gorilla16	NA	gorilla	adult	campo	wild	NA	NA	Moeller2014	NA	NA	21696	illumina	v4	515F 806R
gorilla160	NA	gorilla	adult	djoum	wild	NA	NA	Moeller2014	NA	NA	29164	illumina	v4	515F 806R
gorilla161	NA	gorilla	adult	djoum	wild	NA	NA	Moeller2014	NA	NA	25958	illumina	v4	515F 806R
gorilla162	NA	gorilla	adult	djoum	wild	NA	NA	Moeller2014	NA	NA	41377	illumina	v4	515F 806R
gorilla163	NA	gorilla	adult	djoum	wild	NA	NA	Moeller2014	NA	NA	31688	illumina	v4	515F 806R
gorilla164	NA	gorilla	adult	djoum	wild	NA	NA	Moeller2014	NA	NA	42051	illumina	v4	515F 806R
gorilla165	NA	gorilla	adult	djoum	wild	NA	NA	Moeller2014	NA	NA	28991	illumina	v4	515F 806R
gorilla166	NA	gorilla	adult	djoum	wild	NA	NA	Moeller2014	NA	NA	33657	illumina	v4	515F 806R
gorilla167	NA	gorilla	adult	djoum	wild	NA	NA	Moeller2014	NA	NA	38337	illumina	v4	515F 806R
gorilla168	NA	gorilla	adult	djoum	wild	NA	NA	Moeller2014	NA	NA	35271	illumina	v4	515F 806R
gorilla169	NA	gorilla	adult	djoum	wild	NA	NA	Moeller2014	NA	NA	23619	illumina	v4	515F 806R
gorilla17	NA	gorilla	adult	campo	wild	NA	NA	Moeller2014	NA	NA	29162	illumina	v4	515F 806R
gorilla170	NA	gorilla	adult	djoum	wild	NA	NA	Moeller2014	NA	NA	31654	illumina	v4	515F 806R
gorilla171	NA	gorilla	adult	djoum	wild	NA	NA	Moeller2014	NA	NA	40295	illumina	v4	515F 806R
gorilla172	NA	gorilla	adult	bipindi	wild	NA	NA	Moeller2014	NA	NA	23874	illumina	v4	515F 806R
gorilla173	NA	gorilla	adult	bipindi	wild	NA	NA	Moeller2014	NA	NA	26039	illumina	v4	515F 806R
gorilla174	NA	gorilla	adult	bipindi	wild	NA	NA	Moeller2014	NA	NA	24272	illumina	v4	515F 806R
gorilla175	NA	gorilla	adult	bipindi	wild	NA	NA	Moeller2014	NA	NA	17569	illumina	v4	515F 806R
gorilla176	NA	gorilla	adult	bipindi	wild	NA	NA	Moeller2014	NA	NA	16548	illumina	v4	515F 806R
gorilla177	NA	gorilla	adult	bipindi	wild	NA	NA	Moeller2014	NA	NA	16367	illumina	v4	515F 806R
gorilla178	NA	gorilla	adult	bipindi	wild	NA	NA	Moeller2014	NA	NA	19199	illumina	v4	515F 806R
gorilla179	NA	gorilla	adult	bipindi	wild	NA	NA	Moeller2014	NA	NA	36906	illumina	v4	515F 806R
gorilla18	NA	gorilla	adult	campo	wild	NA	NA	Moeller2014	NA	NA	35131	illumina	v4	515F 806R
gorilla180	NA	gorilla	adult	bipindi	wild	NA	NA	Moeller2014	NA	NA	43156	illumina	v4	515F 806R
gorilla181	NA	gorilla	adult	bipindi	wild	NA	NA	Moeller2014	NA	NA	41557	illumina	v4	515F 806R
gorilla182	NA	gorilla	adult	bipindi	wild	NA	NA	Moeller2014	NA	NA	36410	illumina	v4	515F 806R
gorilla183	NA	gorilla	adult	bipindi	wild	NA	NA	Moeller2014	NA	NA	37563	illumina	v4	515F 806R
gorilla184	NA	gorilla	adult	bipindi	wild	NA	NA	Moeller2014	NA	NA	25311	illumina	v4	515F 806R
gorilla185	NA	gorilla	adult	bipindi	wild	NA	NA	Moeller2014	NA	NA	35213	illumina	v4	515F 806R
gorilla186	NA	gorilla	adult	bipindi	wild	NA	NA	Moeller2014	NA	NA	24317	illumina	v4	515F 806R
gorilla19	NA	gorilla	adult	campo	wild	NA	NA	Moeller2014	NA	NA	21231	illumina	v4	515F 806R
gorilla20	NA	gorilla	adult	campo	wild	NA	NA	Moeller2014	NA	NA	38187	illumina	v4	515F 806R
gorilla21	NA	gorilla	adult	campo	wild	NA	NA	Moeller2014	NA	NA	27523	illumina	v4	515F 806R
gorilla22	NA	gorilla	adult	campo	wild	NA	NA	Moeller2014	NA	NA	39543	illumina	v4	515F 806R
gorilla23	NA	gorilla	adult	campo	wild	NA	NA	Moeller2014	NA	NA	33495	illumina	v4	515F 806R
gorilla24	NA	gorilla	adult	campo	wild	NA	NA	Moeller2014	NA	NA	19882	illumina	v4	515F 806R
gorilla25	NA	gorilla	adult	campo	wild	NA	NA	Moeller2014	NA	NA	27238	illumina	v4	515F 806R
gorilla26	NA	gorilla	adult	campo	wild	NA	NA	Moeller2014	NA	NA	18977	illumina	v4	515F 806R
gorilla27	NA	gorilla	adult	campo	wild	NA	NA	Moeller2014	NA	NA	26089	illumina	v4	515F 806R
gorilla28	NA	gorilla	adult	campo	wild	NA	NA	Moeller2014	NA	NA	31824	illumina	v4	515F 806R
gorilla29	NA	gorilla	adult	campo	wild	NA	NA	Moeller2014	NA	NA	29311	illumina	v4	515F 806R
gorilla3	NA	gorilla	adult	campo	wild	NA	NA	Moeller2014	NA	NA	40706	illumina	v4	515F 806R
gorilla30	NA	gorilla	adult	campo	wild	NA	NA	Moeller2014	NA	NA	41354	illumina	v4	515F 806R
gorilla31	NA	gorilla	adult	campo	wild	NA	NA	Moeller2014	NA	NA	34204	illumina	v4	515F 806R
gorilla32	NA	gorilla	adult	campo	wild	NA	NA	Moeller2014	NA	NA	24191	illumina	v4	515F 806R
gorilla34	NA	gorilla	adult	campo	wild	NA	NA	Moeller2014	NA	NA	30169	illumina	v4	515F 806R
gorilla35	NA	gorilla	adult	campo	wild	NA	NA	Moeller2014	NA	NA	44164	illumina	v4	515F 806R
gorilla36	NA	gorilla	adult	campo	wild	NA	NA	Moeller2014	NA	NA	35051	illumina	v4	515F 806R
gorilla37	NA	gorilla	adult	campo	wild	NA	NA	Moeller2014	NA	NA	27929	illumina	v4	515F 806R
gorilla38	NA	gorilla	adult	campo	wild	NA	NA	Moeller2014	NA	NA	30261	illumina	v4	515F 806R
gorilla39	NA	gorilla	adult	campo	wild	NA	NA	Moeller2014	NA	NA	26235	illumina	v4	515F 806R
gorilla4	NA	gorilla	adult	campo	wild	NA	NA	Moeller2014	NA	NA	25743	illumina	v4	515F 806R
gorilla40	NA	gorilla	adult	campo	wild	NA	NA	Moeller2014	NA	NA	29115	illumina	v4	515F 806R
gorilla41	NA	gorilla	adult	campo	wild	NA	NA	Moeller2014	NA	NA	24788	illumina	v4	515F 806R
gorilla42	NA	gorilla	adult	campo	wild	NA	NA	Moeller2014	NA	NA	41794	illumina	v4	515F 806R
gorilla43	NA	gorilla	adult	campo	wild	NA	NA	Moeller2014	NA	NA	13339	illumina	v4	515F 806R
gorilla44	NA	gorilla	adult	campo	wild	NA	NA	Moeller2014	NA	NA	25745	illumina	v4	515F 806R
gorilla45	NA	gorilla	adult	campo	wild	NA	NA	Moeller2014	NA	NA	18933	illumina	v4	515F 806R
gorilla46	NA	gorilla	adult	campo	wild	NA	NA	Moeller2014	NA	NA	16888	illumina	v4	515F 806R
gorilla47	NA	gorilla	adult	campo	wild	NA	NA	Moeller2014	NA	NA	23979	illumina	v4	515F 806R
gorilla48	NA	gorilla	adult	campo	wild	NA	NA	Moeller2014	NA	NA	45023	illumina	v4	515F 806R
gorilla49	NA	gorilla	adult	campo	wild	NA	NA	Moeller2014	NA	NA	19310	illumina	v4	515F 806R
gorilla5	NA	gorilla	adult	campo	wild	NA	NA	Moeller2014	NA	NA	24362	illumina	v4	515F 806R
gorilla50	NA	gorilla	adult	campo	wild	NA	NA	Moeller2014	NA	NA	33408	illumina	v4	515F 806R
gorilla51	NA	gorilla	adult	campo	wild	NA	NA	Moeller2014	NA	NA	27412	illumina	v4	515F 806R
gorilla52	NA	gorilla	adult	campo	wild	NA	NA	Moeller2014	NA	NA	33372	illumina	v4	515F 806R
gorilla53	NA	gorilla	adult	campo	wild	NA	NA	Moeller2014	NA	NA	23114	illumina	v4	515F 806R
gorilla54	NA	gorilla	adult	campo	wild	NA	NA	Moeller2014	NA	NA	27950	illumina	v4	515F 806R
gorilla55	NA	gorilla	adult	campo	wild	NA	NA	Moeller2014	NA	NA	2131	illumina	v4	515F 806R
gorilla56	NA	gorilla	adult	campo	wild	NA	NA	Moeller2014	NA	NA	11950	illumina	v4	515F 806R
gorilla57	NA	gorilla	adult	campo	wild	NA	NA	Moeller2014	NA	NA	29714	illumina	v4	515F 806R
gorilla58	NA	gorilla	adult	campo	wild	NA	NA	Moeller2014	NA	NA	31740	illumina	v4	515F 806R
gorilla59	NA	gorilla	adult	campo	wild	NA	NA	Moeller2014	NA	NA	2044	illumina	v4	515F 806R
gorilla60	NA	gorilla	adult	campo	wild	NA	NA	Moeller2014	NA	NA	24971	illumina	v4	515F 806R
gorilla61	NA	gorilla	adult	campo	wild	NA	NA	Moeller2014	NA	NA	45365	illumina	v4	515F 806R
gorilla62	NA	gorilla	adult	campo	wild	NA	NA	Moeller2014	NA	NA	23770	illumina	v4	515F 806R
gorilla63	NA	gorilla	adult	campo	wild	NA	NA	Moeller2014	NA	NA	33059	illumina	v4	515F 806R
gorilla64	NA	gorilla	adult	campo	wild	NA	NA	Moeller2014	NA	NA	29585	illumina	v4	515F 806R
gorilla65	NA	gorilla	adult	campo	wild	NA	NA	Moeller2014	NA	NA	27181	illumina	v4	515F 806R
gorilla66	NA	gorilla	adult	campo	wild	NA	NA	Moeller2014	NA	NA	25462	illumina	v4	515F 806R
gorilla67	NA	gorilla	adult	campo	wild	NA	NA	Moeller2014	NA	NA	26838	illumina	v4	515F 806R
gorilla68	NA	gorilla	adult	campo	wild	NA	NA	Moeller2014	NA	NA	25674	illumina	v4	515F 806R
gorilla69	NA	gorilla	adult	campo	wild	NA	NA	Moeller2014	NA	NA	29852	illumina	v4	515F 806R
gorilla7	NA	gorilla	adult	campo	wild	NA	NA	Moeller2014	NA	NA	45670	illumina	v4	515F 806R
gorilla70	NA	gorilla	adult	campo	wild	NA	NA	Moeller2014	NA	NA	29640	illumina	v4	515F 806R
gorilla71	NA	gorilla	adult	campo	wild	NA	NA	Moeller2014	NA	NA	25130	illumina	v4	515F 806R
gorilla72	NA	gorilla	adult	campo	wild	NA	NA	Moeller2014	NA	NA	41553	illumina	v4	515F 806R
gorilla73	NA	gorilla	adult	campo	wild	NA	NA	Moeller2014	NA	NA	31317	illumina	v4	515F 806R
gorilla74	NA	gorilla	adult	campo	wild	NA	NA	Moeller2014	NA	NA	47935	illumina	v4	515F 806R
gorilla75	NA	gorilla	adult	campo	wild	NA	NA	Moeller2014	NA	NA	44101	illumina	v4	515F 806R
gorilla76	NA	gorilla	adult	campo	wild	NA	NA	Moeller2014	NA	NA	36868	illumina	v4	515F 806R
gorilla77	NA	gorilla	adult	campo	wild	NA	NA	Moeller2014	NA	NA	38956	illumina	v4	515F 806R
gorilla78	NA	gorilla	adult	campo	wild	NA	NA	Moeller2014	NA	NA	17631	illumina	v4	515F 806R
gorilla79	NA	gorilla	adult	campo	wild	NA	NA	Moeller2014	NA	NA	30661	illumina	v4	515F 806R
gorilla8	NA	gorilla	adult	campo	wild	NA	NA	Moeller2014	NA	NA	14726	illumina	v4	515F 806R
gorilla80	NA	gorilla	adult	campo	wild	NA	NA	Moeller2014	NA	NA	27106	illumina	v4	515F 806R
gorilla81	NA	gorilla	adult	campo	wild	NA	NA	Moeller2014	NA	NA	20717	illumina	v4	515F 806R
gorilla82	NA	gorilla	adult	campo	wild	NA	NA	Moeller2014	NA	NA	43509	illumina	v4	515F 806R
gorilla83	NA	gorilla	adult	campo	wild	NA	NA	Moeller2014	NA	NA	22908	illumina	v4	515F 806R
gorilla84	NA	gorilla	adult	campo	wild	NA	NA	Moeller2014	NA	NA	31115	illumina	v4	515F 806R
gorilla85	NA	gorilla	adult	campo	wild	NA	NA	Moeller2014	NA	NA	26276	illumina	v4	515F 806R
gorilla86	NA	gorilla	adult	campo	wild	NA	NA	Moeller2014	NA	NA	29580	illumina	v4	515F 806R
gorilla87	NA	gorilla	adult	campo	wild	NA	NA	Moeller2014	NA	NA	21028	illumina	v4	515F 806R
gorilla88	NA	gorilla	adult	campo	wild	NA	NA	Moeller2014	NA	NA	34140	illumina	v4	515F 806R
gorilla89	NA	gorilla	adult	campo	wild	NA	NA	Moeller2014	NA	NA	19881	illumina	v4	515F 806R
gorilla9	NA	gorilla	adult	campo	wild	NA	NA	Moeller2014	NA	NA	31704	illumina	v4	515F 806R
gorilla90	NA	gorilla	adult	campo	wild	NA	NA	Moeller2014	NA	NA	37513	illumina	v4	515F 806R
gorilla91	NA	gorilla	adult	campo	wild	NA	NA	Moeller2014	NA	NA	23306	illumina	v4	515F 806R
gorilla92	NA	gorilla	adult	campo	wild	NA	NA	Moeller2014	NA	NA	30287	illumina	v4	515F 806R
gorilla93	NA	gorilla	adult	campo	wild	NA	NA	Moeller2014	NA	NA	33985	illumina	v4	515F 806R
gorilla94	NA	gorilla	adult	campo	wild	NA	NA	Moeller2014	NA	NA	27148	illumina	v4	515F 806R
gorilla95	NA	gorilla	adult	campo	wild	NA	NA	Moeller2014	NA	NA	35619	illumina	v4	515F 806R
gorilla96	NA	gorilla	adult	campo	wild	NA	NA	Moeller2014	NA	NA	8148	illumina	v4	515F 806R
gorilla97	NA	gorilla	adult	campo	wild	NA	NA	Moeller2014	NA	NA	27071	illumina	v4	515F 806R
gorilla98	NA	gorilla	adult	campo	wild	NA	NA	Moeller2014	NA	NA	33153	illumina	v4	515F 806R
gorilla99	NA	gorilla	adult	campo	wild	NA	NA	Moeller2014	NA	NA	44014	illumina	v4	515F 806R
ERR2182686	NA	human	adult	Tibet_Han	pastoral_farmer	NA	NA	Li2018	NA	ERR2182686	36239	illumina	v4v5	515F 909R
ERR2182687	NA	human	adult	Tibet_Han	pastoral_farmer	NA	NA	Li2018	NA	ERR2182687	23721	illumina	v4v5	515F 909R
ERR2182689	NA	human	adult	Tibet_Han	pastoral_farmer	NA	NA	Li2018	NA	ERR2182689	38174	illumina	v4v5	515F 909R
ERR2182690	NA	human	adult	Tibet_Han	pastoral_farmer	NA	NA	Li2018	NA	ERR2182690	30068	illumina	v4v5	515F 909R
ERR2182692	NA	human	adult	Tibet_Han	pastoral_farmer	NA	NA	Li2018	NA	ERR2182692	27877	illumina	v4v5	515F 909R
ERR2182693	NA	human	adult	Tibet_Han	pastoral_farmer	NA	NA	Li2018	NA	ERR2182693	38656	illumina	v4v5	515F 909R
ERR2182694	NA	human	adult	Tibet_Han	pastoral_farmer	NA	NA	Li2018	NA	ERR2182694	37692	illumina	v4v5	515F 909R
ERR2182695	NA	human	adult	Tibet_Han	pastoral_farmer	NA	NA	Li2018	NA	ERR2182695	47755	illumina	v4v5	515F 909R
ERR2182696	NA	human	adult	Tibet_Han	pastoral_farmer	NA	NA	Li2018	NA	ERR2182696	35578	illumina	v4v5	515F 909R
ERR2182697	NA	human	adult	Tibet_Han	pastoral_farmer	NA	NA	Li2018	NA	ERR2182697	46839	illumina	v4v5	515F 909R
ERR2182698	NA	human	adult	Tibet_Han	pastoral_farmer	NA	NA	Li2018	NA	ERR2182698	35098	illumina	v4v5	515F 909R
ERR2182699	NA	human	adult	Tibet_Han	pastoral_farmer	NA	NA	Li2018	NA	ERR2182699	35363	illumina	v4v5	515F 909R
ERR2182700	NA	human	adult	Tibet_Han	pastoral_farmer	NA	NA	Li2018	NA	ERR2182700	51307	illumina	v4v5	515F 909R
ERR2182701	NA	human	adult	Tibet_Han	pastoral_farmer	NA	NA	Li2018	NA	ERR2182701	43694	illumina	v4v5	515F 909R
ERR2182702	NA	human	adult	Tibet_Han	pastoral_farmer	NA	NA	Li2018	NA	ERR2182702	51709	illumina	v4v5	515F 909R
ERR2182703	NA	human	adult	Tibet_Han	pastoral_farmer	NA	NA	Li2018	NA	ERR2182703	44431	illumina	v4v5	515F 909R
ERR2182704	NA	human	adult	Tibet_Han	pastoral_farmer	NA	NA	Li2018	NA	ERR2182704	24488	illumina	v4v5	515F 909R
ERR2182706	NA	human	adult	Tibet_Han	pastoral_farmer	NA	NA	Li2018	NA	ERR2182706	32416	illumina	v4v5	515F 909R
ERR2182708	NA	human	adult	Tibet_Han	pastoral_farmer	NA	NA	Li2018	NA	ERR2182708	51382	illumina	v4v5	515F 909R
ERR2182709	NA	human	adult	Tibet_Han	pastoral_farmer	NA	NA	Li2018	NA	ERR2182709	23195	illumina	v4v5	515F 909R
ERR2182691	NA	human	adult	Tibet_Han	pastoral_farmer	NA	NA	Li2018	NA	ERR2182691	25742	illumina	v4v5	515F 909R
ERR2182688	NA	human	adult	Tibet_Han	pastoral_farmer	NA	NA	Li2018	NA	ERR2182688	32791	illumina	v4v5	515F 909R
ERR2182707	NA	human	adult	Tibet_Han	pastoral_farmer	NA	NA	Li2018	NA	ERR2182707	59007	illumina	v4v5	515F 909R
ERR2182705	NA	human	adult	Tibet_Han	pastoral_farmer	NA	NA	Li2018	NA	ERR2182705	41185	illumina	v4v5	515F 786R
HCO01	NA	human	adult	Tunapuco	rural_farming	36	female	Obregon2015	NA	NA	25890	illumina	v4	515F 806R
HCO02	NA	human	child	Tunapuco	rural_farming	9	female	Obregon2015	NA	NA	29142	illumina	v4	515F 806R
HCO03	NA	human	child	Tunapuco	rural_farming	6	male	Obregon2015	NA	NA	19922	illumina	v4	515F 806R
HCO04	NA	human	child	Tunapuco	rural_farming	4	male	Obregon2015	NA	NA	26615	illumina	v4	515F 806R
HCO07	NA	human	child	Tunapuco	rural_farming	3	female	Obregon2015	NA	NA	28915	illumina	v4	515F 806R
HCO09	NA	human	adolescent	Tunapuco	rural_farming	13	na	Obregon2015	NA	NA	32715	illumina	v4	515F 806R
HCO10	NA	human	child	Tunapuco	rural_farming	10	male	Obregon2015	NA	NA	28935	illumina	v4	515F 806R
HCO11	NA	human	adult	Tunapuco	rural_farming	36	male	Obregon2015	NA	NA	106266	illumina	v4	515F 806R
HCO12	NA	human	adult	Tunapuco	rural_farming	35	female	Obregon2015	NA	NA	19869	illumina	v4	515F 806R
HCO13	NA	human	child	Tunapuco	rural_farming	9	female	Obregon2015	NA	NA	175400	illumina	v4	515F 806R
HCO14	NA	human	adult	Tunapuco	rural_farming	34	female	Obregon2015	NA	NA	86378	illumina	v4	515F 806R
HCO15	NA	human	adult	Tunapuco	rural_farming	63	female	Obregon2015	NA	NA	170387	illumina	v4	515F 806R
HCO16	NA	human	adolescent	Tunapuco	rural_farming	11	na	Obregon2015	NA	NA	180819	illumina	v4	515F 806R
HCO17	NA	human	child	Tunapuco	rural_farming	7	female	Obregon2015	NA	NA	179419	illumina	v4	515F 806R
HCO18	NA	human	adolescent	Tunapuco	rural_farming	11	male	Obregon2015	NA	NA	220801	illumina	v4	515F 806R
HCO21	NA	human	child	Tunapuco	rural_farming	10	male	Obregon2015	NA	NA	165947	illumina	v4	515F 806R
HCO41	NA	human	adult	Tunapuco	rural_farming	54	na	Obregon2015	NA	NA	263049	illumina	v4	515F 806R
HCO53	NA	human	adult	Tunapuco	rural_farming	44	female	Obregon2015	NA	NA	19010	illumina	v4	515F 806R
HCO61	NA	human	adult	Tunapuco	rural_farming	20	female	Obregon2015	NA	NA	115066	illumina	v4	515F 806R
HCO62	NA	human	adult	Tunapuco	rural_farming	na	male	Obregon2015	NA	NA	160478	illumina	v4	515F 806R
HCO63	NA	human	child	Tunapuco	rural_farming	6	female	Obregon2015	NA	NA	249229	illumina	v4	515F 806R
HCO64	NA	human	adult	Tunapuco	rural_farming	na	female	Obregon2015	NA	NA	31265	illumina	v4	515F 806R
HCO65	NA	human	adult	Tunapuco	rural_farming	na	female	Obregon2015	NA	NA	25429	illumina	v4	515F 806R
HCO66	NA	human	adolescent	Tunapuco	rural_farming	11	male	Obregon2015	NA	NA	37801	illumina	v4	515F 806R
HCO67	NA	human	adult	Tunapuco	rural_farming	26	female	Obregon2015	NA	NA	33269	illumina	v4	515F 806R
HCO68	NA	human	child	Tunapuco	rural_farming	7	male	Obregon2015	NA	NA	211072	illumina	v4	515F 806R
HCO69	NA	human	child	Tunapuco	rural_farming	9	na	Obregon2015	NA	NA	98768	illumina	v4	515F 806R
HCO70	NA	human	adult	Tunapuco	rural_farming	40	female	Obregon2015	NA	NA	134329	illumina	v4	515F 806R
HCO72	NA	human	child	Tunapuco	rural_farming	5	female	Obregon2015	NA	NA	209579	illumina	v4	515F 806R
HCO73	NA	human	adult	Tunapuco	rural_farming	na	female	Obregon2015	NA	NA	177601	illumina	v4	515F 806R
HCO74	NA	human	adult	Tunapuco	rural_farming	36	female	Obregon2015	NA	NA	144051	illumina	v4	515F 806R
NO01	NA	human	adult	Norman	urban	23	male	Obregon2015	NA	NA	219925	illumina	v4	515F 806R
NO02	NA	human	adult	Norman	urban	37	female	Obregon2015	NA	NA	123772	illumina	v4	515F 806R
NO03	NA	human	adult	Norman	urban	40	male	Obregon2015	NA	NA	84042	illumina	v4	515F 806R
NO04	NA	human	adult	Norman	urban	26	male	Obregon2015	NA	NA	120143	illumina	v4	515F 806R
NO05	NA	human	adult	Norman	urban	28	male	Obregon2015	NA	NA	125909	illumina	v4	515F 806R
NO06	NA	human	adult	Norman	urban	28	male	Obregon2015	NA	NA	148940	illumina	v4	515F 806R
NO07	NA	human	adult	Norman	urban	32	female	Obregon2015	NA	NA	357828	illumina	v4	515F 806R
NO08	NA	human	adult	Norman	urban	32	female	Obregon2015	NA	NA	234531	illumina	v4	515F 806R
NO09	NA	human	adult	Norman	urban	34	female	Obregon2015	NA	NA	137595	illumina	v4	515F 806R
NO10	NA	human	adult	Norman	urban	41	male	Obregon2015	NA	NA	171714	illumina	v4	515F 806R
NO11	NA	human	adult	Norman	urban	26	male	Obregon2015	NA	NA	163147	illumina	v4	515F 806R
NO12	NA	human	adult	Norman	urban	27	female	Obregon2015	NA	NA	139647	illumina	v4	515F 806R
NO13	NA	human	adult	Norman	urban	35	male	Obregon2015	NA	NA	73907	illumina	v4	515F 806R
NO14	NA	human	child	Norman	urban	10	female	Obregon2015	NA	NA	201279	illumina	v4	515F 806R
NO15	NA	human	adult	Norman	urban	50	female	Obregon2015	NA	NA	137201	illumina	v4	515F 806R
NO16	NA	human	adult	Norman	urban	47	male	Obregon2015	NA	NA	207056	illumina	v4	515F 806R
NO17	NA	human	child	Norman	urban	10	male	Obregon2015	NA	NA	152005	illumina	v4	515F 806R
NO18	NA	human	child	Norman	urban	7	male	Obregon2015	NA	NA	133136	illumina	v4	515F 806R
NO19	NA	human	adult	Norman	urban	32	female	Obregon2015	NA	NA	169580	illumina	v4	515F 806R
NO20	NA	human	adult	Norman	urban	26	male	Obregon2015	NA	NA	144511	illumina	v4	515F 806R
NO21	NA	human	adult	Norman	urban	23	male	Obregon2015	NA	NA	136702	illumina	v4	515F 806R
NO22	NA	human	adult	Norman	urban	26	male	Obregon2015	NA	NA	133508	illumina	v4	515F 806R
NO23	NA	human	adult	Norman	urban	26	female	Obregon2015	NA	NA	157919	illumina	v4	515F 806R
SM01	NA	human	adult	Matses	HG	30	male	Obregon2015	NA	NA	96773	illumina	v4	515F 806R
SM02	NA	human	adult	Matses	HG	25	female	Obregon2015	NA	NA	89370	illumina	v4	515F 806R
SM03	NA	human	child	Matses	HG	10	male	Obregon2015	NA	NA	108481	illumina	v4	515F 806R
SM05	NA	human	child	Matses	HG	1	male	Obregon2015	NA	NA	97170	illumina	v4	515F 806R
SM10	NA	human	child	Matses	HG	6	female	Obregon2015	NA	NA	86656	illumina	v4	515F 806R
SM11	NA	human	child	Matses	HG	4	female	Obregon2015	NA	NA	99468	illumina	v4	515F 806R
SM18	NA	human	adult	Matses	HG	36	female	Obregon2015	NA	NA	103438	illumina	v4	515F 806R
SM20	NA	human	adult	Matses	HG	20	female	Obregon2015	NA	NA	95462	illumina	v4	515F 806R
SM23	NA	human	child	Matses	HG	7	male	Obregon2015	NA	NA	99439	illumina	v4	515F 806R
SM24	NA	human	child	Matses	HG	2	male	Obregon2015	NA	NA	99989	illumina	v4	515F 806R
SM25	NA	human	child	Matses	HG	2	female	Obregon2015	NA	NA	282526	illumina	v4	515F 806R
SM28	NA	human	adult	Matses	HG	52	female	Obregon2015	NA	NA	93951	illumina	v4	515F 806R
SM29	NA	human	adult	Matses	HG	50	female	Obregon2015	NA	NA	105303	illumina	v4	515F 806R
SM30	NA	human	child	Matses	HG	4	male	Obregon2015	NA	NA	90000	illumina	v4	515F 806R
SM31	NA	human	adult	Matses	HG	30	male	Obregon2015	NA	NA	111057	illumina	v4	515F 806R
SM32	NA	human	adult	Matses	HG	21	female	Obregon2015	NA	NA	91905	illumina	v4	515F 806R
SM33	NA	human	child	Matses	HG	5	female	Obregon2015	NA	NA	93080	illumina	v4	515F 806R
SM34	NA	human	child	Matses	HG	4	male	Obregon2015	NA	NA	111553	illumina	v4	515F 806R
SM37	NA	human	adolescent	Matses	HG	12	male	Obregon2015	NA	NA	109898	illumina	v4	515F 806R
SM39	NA	human	adult	Matses	HG	40	female	Obregon2015	NA	NA	52181	illumina	v4	515F 806R
SM40	NA	human	adult	Matses	HG	18	female	Obregon2015	NA	NA	83169	illumina	v4	515F 806R
SM41	NA	human	child	Matses	HG	6	male	Obregon2015	NA	NA	85973	illumina	v4	515F 806R
SM42	NA	human	child	Matses	HG	4	male	Obregon2015	NA	NA	109175	illumina	v4	515F 806R
SM43	NA	human	child	Matses	HG	2	female	Obregon2015	NA	NA	85863	illumina	v4	515F 806R
SM44	NA	human	child	Matses	HG	4	male	Obregon2015	NA	NA	107827	illumina	v4	515F 806R
SRR9211953	NA	human	adult	Buiucu	mixed	23	female	Pires2019	NA	SRR9211953	69355	illumina	v4	515F 806R
SRR9211930	NA	human	adult	Puruzinho	mixed	58	male	Pires2019	NA	SRR9211930	64729	illumina	v4	515F 806R
SRR9211932	NA	human	adult	Buiucu	mixed	20	female	Pires2019	NA	SRR9211932	64133	illumina	v4	515F 806R
SRR9211933	NA	human	adult	Puruzinho	mixed	24	female	Pires2019	NA	SRR9211933	77997	illumina	v4	515F 806R
SRR9211934	NA	human	adult	Buiucu	mixed	26	male	Pires2019	NA	SRR9211934	53440	illumina	v4	515F 806R
SRR9211935	NA	human	adult	Buiucu	mixed	35	female	Pires2019	NA	SRR9211935	56335	illumina	v4	515F 806R
SRR9211937	NA	human	adult	Buiucu	mixed	28	female	Pires2019	NA	SRR9211937	83645	illumina	v4	515F 806R
SRR9211938	NA	human	adult	Rio	urban	29	female	Pires2019	NA	SRR9211938	70661	illumina	v4	515F 806R
SRR9211939	NA	human	adult	Rio	urban	39	female	Pires2019	NA	SRR9211939	62611	illumina	v4	515F 806R
SRR9211940	NA	human	adult	Rio	urban	30	female	Pires2019	NA	SRR9211940	87725	illumina	v4	515F 806R
SRR9211942	NA	human	adult	Rio	urban	23	male	Pires2019	NA	SRR9211942	65991	illumina	v4	515F 806R
SRR9211943	NA	human	adult	Rio	urban	21	female	Pires2019	NA	SRR9211943	80241	illumina	v4	515F 806R
SRR9211944	NA	human	adult	Puruzinho	mixed	57	female	Pires2019	NA	SRR9211944	79628	illumina	v4	515F 806R
SRR9211945	NA	human	adult	Puruzinho	mixed	23	female	Pires2019	NA	SRR9211945	83086	illumina	v4	515F 806R
SRR9211946	NA	human	adult	Buiucu	mixed	31	male	Pires2019	NA	SRR9211946	79802	illumina	v4	515F 806R
SRR9211948	NA	human	adult	Buiucu	mixed	23	male	Pires2019	NA	SRR9211948	71387	illumina	v4	515F 806R
SRR9211951	NA	human	adult	Buiucu	mixed	35	female	Pires2019	NA	SRR9211951	76729	illumina	v4	515F 806R
SRR9211954	NA	human	adult	Buiucu	mixed	44	female	Pires2019	NA	SRR9211954	67878	illumina	v4	515F 806R
SRR9211955	NA	human	adult	Buiucu	mixed	36	male	Pires2019	NA	SRR9211955	69405	illumina	v4	515F 806R
SRR9211956	NA	human	adult	Rio	urban	37	male	Pires2019	NA	SRR9211956	65725	illumina	v4	515F 806R
SRR9211958	NA	human	adult	Rio	urban	19	male	Pires2019	NA	SRR9211958	74916	illumina	v4	515F 806R
SRR9211959	NA	human	adult	Rio	urban	21	female	Pires2019	NA	SRR9211959	74101	illumina	v4	515F 806R
SRR9211960	NA	human	adult	Puruzinho	mixed	32	female	Pires2019	NA	SRR9211960	67856	illumina	v4	515F 806R
SRR9211961	NA	human	adult	Puruzinho	mixed	38	male	Pires2019	NA	SRR9211961	70145	illumina	v4	515F 806R
SRR9211962	NA	human	adult	Puruzinho	mixed	38	male	Pires2019	NA	SRR9211962	74098	illumina	v4	515F 806R
SRR9211963	NA	human	adult	Puruzinho	mixed	32	female	Pires2019	NA	SRR9211963	57675	illumina	v4	515F 806R
SRR9211964	NA	human	adult	Puruzinho	mixed	37	male	Pires2019	NA	SRR9211964	51313	illumina	v4	515F 806R
SRR9211965	NA	human	adult	Puruzinho	mixed	35	female	Pires2019	NA	SRR9211965	86281	illumina	v4	515F 806R
SRR9211966	NA	human	adult	Puruzinho	mixed	26	female	Pires2019	NA	SRR9211966	75552	illumina	v4	515F 806R
SRR9211967	NA	human	adult	Puruzinho	mixed	23	male	Pires2019	NA	SRR9211967	83761	illumina	v4	515F 806R
SRR9211968	NA	human	adult	Puruzinho	mixed	30	male	Pires2019	NA	SRR9211968	65468	illumina	v4	515F 806R
SRR9211969	NA	human	adult	Puruzinho	mixed	40	female	Pires2019	NA	SRR9211969	76572	illumina	v4	515F 806R
SRR9211971	NA	human	adult	Rio	urban	26	female	Pires2019	NA	SRR9211971	80187	illumina	v4	515F 806R
SRR9211972	NA	human	adult	Rio	urban	34	female	Pires2019	NA	SRR9211972	65062	illumina	v4	515F 806R
SRR9211950	NA	human	adult	Buiucu	mixed	29	male	Pires2019	NA	SRR9211950	61899	illumina	v4	515F 806R
SRR9211941	NA	human	adult	Rio	urban	23	female	Pires2019	NA	SRR9211941	65096	illumina	v4	515F 806R
SRR9211952	NA	human	adult	Buiucu	mixed	20	male	Pires2019	NA	SRR9211952	76285	illumina	v4	515F 806R
SRR9211936	NA	human	adult	Buiucu	mixed	30	female	Pires2019	NA	SRR9211936	76225	illumina	v4	515F 806R
SRR9211970	NA	human	adult	Rio	urban	49	female	Pires2019	NA	SRR9211970	85596	illumina	v4	515F 806R
SRR9211931	NA	human	adult	Puruzinho	mixed	45	female	Pires2019	NA	SRR9211931	72481	illumina	v4	515F 806R
SRR9211947	NA	human	adult	Buiucu	mixed	28	female	Pires2019	NA	SRR9211947	90550	illumina	v4	515F 806R
SRR9211949	NA	human	adult	Buiucu	mixed	21	female	Pires2019	NA	SRR9211949	85148	illumina	v4	515F 806R
SRR9211957	NA	human	adult	Rio	urban	20	female	Pires2019	NA	SRR9211957	78877	illumina	v4	515F 806R
H01	NA	human	adult	Hadza	HG	43	female	Schnorr2014	NA	mgs149042	4845	454	v4	520F 802R
H02	NA	human	adult	Hadza	HG	37	male	Schnorr2014	NA	mgs149045	6992	454	v4	520F 802R
H03	NA	human	adult	Hadza	HG	22	male	Schnorr2014	NA	mgs149048	6398	454	v4	520F 802R
H04	NA	human	adult	Hadza	HG	24	male	Schnorr2014	NA	mgs149051	4919	454	v4	520F 802R
H05	NA	human	adult	Hadza	HG	70	female	Schnorr2014	NA	mgs149054	5820	454	v4	520F 802R
H06	NA	human	adult	Hadza	HG	30	male	Schnorr2014	NA	mgs149057	5409	454	v4	520F 802R
H07	NA	human	adult	Hadza	HG	38	female	Schnorr2014	NA	mgs149060	5518	454	v4	520F 802R
H08	NA	human	adult	Hadza	HG	20	female	Schnorr2014	NA	mgs149063	4344	454	v4	520F 802R
H09	NA	human	adult	Hadza	HG	47	female	Schnorr2014	NA	mgs149066	5673	454	v4	520F 802R
H10	NA	human	adult	Hadza	HG	40	female	Schnorr2014	NA	mgs149069	5287	454	v4	520F 802R
H11	NA	human	adult	Hadza	HG	29	female	Schnorr2014	NA	mgs149072	5206	454	v4	520F 802R
H12	NA	human	child	Hadza	HG	8	female	Schnorr2014	NA	mgs149075	5543	454	v4	520F 802R
H13	NA	human	adult	Hadza	HG	34	male	Schnorr2014	NA	mgs149078	6469	454	v4	520F 802R
H14	NA	human	adult	Hadza	HG	30	male	Schnorr2014	NA	mgs149081	5426	454	v4	520F 802R
H15	NA	human	adult	Hadza	HG	16	male	Schnorr2014	NA	mgs149084	7361	454	v4	520F 802R
H16	NA	human	adult	Hadza	HG	21	male	Schnorr2014	NA	mgs149087	5358	454	v4	520F 802R
H17	NA	human	adult	Hadza	HG	23	male	Schnorr2014	NA	mgs149090	4579	454	v4	520F 802R
H18	NA	human	adult	Hadza	HG	17	male	Schnorr2014	NA	mgs149093	5641	454	v4	520F 802R
H19	NA	human	adult	Hadza	HG	15	male	Schnorr2014	NA	mgs149096	5303	454	v4	520F 802R
H20	NA	human	adolescent	Hadza	HG	13	male	Schnorr2014	NA	mgs149099	8394	454	v4	520F 802R
H21	NA	human	adult	Hadza	HG	43	male	Schnorr2014	NA	mgs149102	6157	454	v4	520F 802R
H22	NA	human	adult	Hadza	HG	38	male	Schnorr2014	NA	mgs149105	5908	454	v4	520F 802R
H23	NA	human	adult	Hadza	HG	24	male	Schnorr2014	NA	mgs149108	6849	454	v4	520F 802R
H24	NA	human	adult	Hadza	HG	65	male	Schnorr2014	NA	mgs149111	5756	454	v4	520F 802R
H25	NA	human	adult	Hadza	HG	40	male	Schnorr2014	NA	mgs149114	6425	454	v4	520F 802R
H26	NA	human	adult	Hadza	HG	48	male	Schnorr2014	NA	mgs149117	5835	454	v4	520F 802R
H27	NA	human	adult	Hadza	HG	29	female	Schnorr2014	NA	mgs149120	5025	454	v4	520F 802R
IT01	NA	human	adult	Italian	urban	38	male	Schnorr2014	NA	mgs149123	5424	454	v4	520F 802R
IT02	NA	human	adult	Italian	urban	34	female	Schnorr2014	NA	mgs149126	13662	454	v4	520F 802R
IT03	NA	human	adult	Italian	urban	29	female	Schnorr2014	NA	mgs149129	11861	454	v4	520F 802R
IT04	NA	human	adult	Italian	urban	27	male	Schnorr2014	NA	mgs149132	13478	454	v4	520F 802R
IT05	NA	human	adult	Italian	urban	30	male	Schnorr2014	NA	mgs149135	11090	454	v4	520F 802R
IT06	NA	human	adult	Italian	urban	32	female	Schnorr2014	NA	mgs149138	11527	454	v4	520F 802R
IT07	NA	human	adult	Italian	urban	25	female	Schnorr2014	NA	mgs149141	11215	454	v4	520F 802R
IT08	NA	human	adult	Italian	urban	34	male	Schnorr2014	NA	mgs149144	12487	454	v4	520F 802R
IT09	NA	human	adult	Italian	urban	39	female	Schnorr2014	NA	mgs149147	6195	454	v4	520F 802R
IT10	NA	human	adult	Italian	urban	40	female	Schnorr2014	NA	mgs149150	7633	454	v4	520F 802R
IT11	NA	human	adult	Italian	urban	40	female	Schnorr2014	NA	mgs149153	5967	454	v4	520F 802R
IT12	NA	human	adult	Italian	urban	30	female	Schnorr2014	NA	mgs149156	5461	454	v4	520F 802R
IT13	NA	human	adult	Italian	urban	30	female	Schnorr2014	NA	mgs149159	6264	454	v4	520F 802R
IT14	NA	human	adult	Italian	urban	21	female	Schnorr2014	NA	mgs149162	9580	454	v4	520F 802R
IT15	NA	human	adult	Italian	urban	29	male	Schnorr2014	NA	mgs149165	12161	454	v4	520F 802R
IT16	NA	human	adult	Italian	urban	32	female	Schnorr2014	NA	mgs149168	10130	454	v4	520F 802R
SRR5760852	TZ_HADZA_329	human	adult	Hadza	HG	61	MALE	Smits2017	NA	SRR5760852	21177	illumina	v4	515F 806R
SRR5760853	TZ_HADZA_326	human	adult	Hadza	HG	27	FEMALE	Smits2017	NA	SRR5760853	25445	illumina	v4	515F 806R
SRR5760854	TZ_HADZA_325	human	child	Hadza	HG	9	MALE	Smits2017	NA	SRR5760854	25977	illumina	v4	515F 806R
SRR5760855	TZ_HADZA_324	human	adult	Hadza	HG	45	FEMALE	Smits2017	NA	SRR5760855	22283	illumina	v4	515F 806R
SRR5760856	TZ_HADZA_284	human	adult	Hadza	HG	55	MALE	Smits2017	NA	SRR5760856	29925	illumina	v4	515F 806R
SRR5760857	TZ_HADZA_283	human	adult	Hadza	HG	55	FEMALE	Smits2017	NA	SRR5760857	26735	illumina	v4	515F 806R
SRR5760858	TZ_HADZA_282	human	adult	Hadza	HG	18	FEMALE	Smits2017	NA	SRR5760858	27706	illumina	v4	515F 806R
SRR5760859	TZ_HADZA_279	human	adult	Hadza	HG	na	FEMALE	Smits2017	NA	SRR5760859	31812	illumina	v4	515F 806R
SRR5760860	TZ_HADZA_276	human	adult	Hadza	HG	na	MALE	Smits2017	NA	SRR5760860	25273	illumina	v4	515F 806R
SRR5760861	TZ_HADZA_275	human	adult	Hadza	HG	21	MALE	Smits2017	NA	SRR5760861	27860	illumina	v4	515F 806R
SRR5760862	TZ_HADZA_3132	human	adult	Hadza	HG	32	MALE	Smits2017	NA	SRR5760862	15045	illumina	v4	515F 806R
SRR5760863	TZ_HADZA_392	human	adult	Hadza	HG	35	MALE	Smits2017	NA	SRR5760863	31958	illumina	v4	515F 806R
SRR5760864	TZ_HADZA_3128	human	adult	Hadza	HG	25	MALE	Smits2017	NA	SRR5760864	23565	illumina	v4	515F 806R
SRR5760865	TZ_HADZA_3129	human	adult	Hadza	HG	35	MALE	Smits2017	NA	SRR5760865	16947	illumina	v4	515F 806R
SRR5760866	TZ_HADZA_172	human	adult	Hadza	HG	40	MALE	Smits2017	NA	SRR5760866	23384	illumina	v4	515F 806R
SRR5760867	TZ_HADZA_3131	human	adult	Hadza	HG	55	MALE	Smits2017	NA	SRR5760867	20904	illumina	v4	515F 806R
SRR5760868	TZ_HADZA_3123	human	adult	Hadza	HG	55	MALE	Smits2017	NA	SRR5760868	18473	illumina	v4	515F 806R
SRR5760869	TZ_HADZA_3124	human	adult	Hadza	HG	65	MALE	Smits2017	NA	SRR5760869	18467	illumina	v4	515F 806R
SRR5760870	TZ_HADZA_436	human	adult	Hadza	HG	35	MALE	Smits2017	NA	SRR5760870	33024	illumina	v4	515F 806R
SRR5760871	TZ_HADZA_3126	human	adult	Hadza	HG	23	MALE	Smits2017	NA	SRR5760871	20702	illumina	v4	515F 806R
SRR5760872	TZ_HADZA_229	human	child	Hadza	HG	9	MALE	Smits2017	NA	SRR5760872	16213	illumina	v4	515F 806R
SRR5760873	TZ_HADZA_230	human	child	Hadza	HG	9	MALE	Smits2017	NA	SRR5760873	27194	illumina	v4	515F 806R
SRR5760874	TZ_HADZA_883	human	adolescent	Hadza	HG	13	MALE	Smits2017	NA	SRR5760874	14402	illumina	v4	515F 806R
SRR5760875	TZ_HADZA_882	human	adult	Hadza	HG	49	FEMALE	Smits2017	NA	SRR5760875	16730	illumina	v4	515F 806R
SRR5760876	TZ_HADZA_879	human	child	Hadza	HG	4	MALE	Smits2017	NA	SRR5760876	17893	illumina	v4	515F 806R
SRR5760877	TZ_HADZA_878	human	adult	Hadza	HG	38	FEMALE	Smits2017	NA	SRR5760877	27410	illumina	v4	515F 806R
SRR5760878	TZ_HADZA_3203	human	child	Hadza	HG	8	FEMALE	Smits2017	NA	SRR5760878	17605	illumina	v4	515F 806R
SRR5760879	TZ_HADZA_3202	human	child	Hadza	HG	7	FEMALE	Smits2017	NA	SRR5760879	23853	illumina	v4	515F 806R
SRR5760880	TZ_HADZA_3201	human	child	Hadza	HG	8	FEMALE	Smits2017	NA	SRR5760880	23412	illumina	v4	515F 806R
SRR5760881	TZ_HADZA_3200	human	child	Hadza	HG	6	FEMALE	Smits2017	NA	SRR5760881	17078	illumina	v4	515F 806R
SRR5760882	TZ_HADZA_3205	human	adult	Hadza	HG	25	FEMALE	Smits2017	NA	SRR5760882	20999	illumina	v4	515F 806R
SRR5760883	TZ_HADZA_3204	human	child	Hadza	HG	3.5	FEMALE	Smits2017	NA	SRR5760883	21899	illumina	v4	515F 806R
SRR5760884	TZ_HADZA_3013	human	adult	Hadza	HG	na	NA	Smits2017	NA	SRR5760884	20187	illumina	v4	515F 806R
SRR5760885	TZ_HADZA_361	human	adult	Hadza	HG	na	NA	Smits2017	NA	SRR5760885	39413	illumina	v4	515F 806R
SRR5760886	TZ_HADZA_357	human	adult	Hadza	HG	na	NA	Smits2017	NA	SRR5760886	22023	illumina	v4	515F 806R
SRR5760887	TZ_HADZA_358	human	adult	Hadza	HG	na	NA	Smits2017	NA	SRR5760887	21482	illumina	v4	515F 806R
SRR5760888	TZ_HADZA_355	human	adult	Hadza	HG	na	NA	Smits2017	NA	SRR5760888	23905	illumina	v4	515F 806R
SRR5760889	TZ_HADZA_356	human	adult	Hadza	HG	na	NA	Smits2017	NA	SRR5760889	24463	illumina	v4	515F 806R
SRR5760890	TZ_HADZA_353	human	adult	Hadza	HG	na	NA	Smits2017	NA	SRR5760890	24490	illumina	v4	515F 806R
SRR5760891	TZ_HADZA_354	human	adult	Hadza	HG	na	NA	Smits2017	NA	SRR5760891	25323	illumina	v4	515F 806R
SRR5760892	TZ_HADZA_362	human	adult	Hadza	HG	na	NA	Smits2017	NA	SRR5760892	24842	illumina	v4	515F 806R
SRR5760893	TZ_HADZA_3014	human	adult	Hadza	HG	na	NA	Smits2017	NA	SRR5760893	21317	illumina	v4	515F 806R
SRR5760894	TZ_HADZA_244	human	adult	Hadza	HG	na	FEMALE	Smits2017	NA	SRR5760894	32512	illumina	v4	515F 806R
SRR5760895	TZ_HADZA_3292	human	adult	Hadza	HG	38	FEMALE	Smits2017	NA	SRR5760895	23893	illumina	v4	515F 806R
SRR5760896	TZ_HADZA_3290	human	child	Hadza	HG	3.5	MALE	Smits2017	NA	SRR5760896	27692	illumina	v4	515F 806R
SRR5760897	TZ_HADZA_3280	human	child	Hadza	HG	6	FEMALE	Smits2017	NA	SRR5760897	19872	illumina	v4	515F 806R
SRR5760898	TZ_HADZA_3279	human	adult	Hadza	HG	30	FEMALE	Smits2017	NA	SRR5760898	22736	illumina	v4	515F 806R
SRR5760899	TZ_HADZA_3276	human	child	Hadza	HG	3.5	FEMALE	Smits2017	NA	SRR5760899	31958	illumina	v4	515F 806R
SRR5760900	TZ_HADZA_3275	human	adult	Hadza	HG	30	MALE	Smits2017	NA	SRR5760900	27382	illumina	v4	515F 806R
SRR5760901	TZ_HADZA_3289	human	adult	Hadza	HG	25	FEMALE	Smits2017	NA	SRR5760901	26451	illumina	v4	515F 806R
SRR5760902	TZ_HADZA_3288	human	adult	Hadza	HG	33	MALE	Smits2017	NA	SRR5760902	26267	illumina	v4	515F 806R
SRR5760903	TZ_HADZA_3286	human	child	Hadza	HG	7	MALE	Smits2017	NA	SRR5760903	26239	illumina	v4	515F 806R
SRR5760904	TZ_HADZA_3281	human	child	Hadza	HG	4	MALE	Smits2017	NA	SRR5760904	24958	illumina	v4	515F 806R
SRR5760905	TZ_HADZA_245	human	adult	Hadza	HG	55	FEMALE	Smits2017	NA	SRR5760905	28174	illumina	v4	515F 806R
SRR5760906	TZ_HADZA_3139	human	adult	Hadza	HG	55	MALE	Smits2017	NA	SRR5760906	22334	illumina	v4	515F 806R
SRR5760907	TZ_HADZA_438	human	adult	Hadza	HG	27	MALE	Smits2017	NA	SRR5760907	33639	illumina	v4	515F 806R
SRR5760908	TZ_HADZA_3141	human	adult	Hadza	HG	27	MALE	Smits2017	NA	SRR5760908	20401	illumina	v4	515F 806R
SRR5760909	TZ_HADZA_3140	human	adult	Hadza	HG	22	MALE	Smits2017	NA	SRR5760909	25211	illumina	v4	515F 806R
SRR5760910	TZ_HADZA_389	human	adult	Hadza	HG	55	MALE	Smits2017	NA	SRR5760910	36951	illumina	v4	515F 806R
SRR5760911	TZ_HADZA_177	human	adult	Hadza	HG	32	MALE	Smits2017	NA	SRR5760911	24910	illumina	v4	515F 806R
SRR5760912	TZ_HADZA_180	human	adult	Hadza	HG	47	MALE	Smits2017	NA	SRR5760912	20439	illumina	v4	515F 806R
SRR5760913	TZ_HADZA_3136	human	adult	Hadza	HG	15	MALE	Smits2017	NA	SRR5760913	19100	illumina	v4	515F 806R
SRR5760914	TZ_HADZA_3143	human	adolescent	Hadza	HG	12	FEMALE	Smits2017	NA	SRR5760914	17679	illumina	v4	515F 806R
SRR5760915	TZ_HADZA_3142	human	adult	Hadza	HG	40	FEMALE	Smits2017	NA	SRR5760915	21598	illumina	v4	515F 806R
SRR5760916	TZ_HADZA_3256	human	adult	Hadza	HG	33	MALE	Smits2017	NA	SRR5760916	23198	illumina	v4	515F 806R
SRR5760917	TZ_HADZA_3257	human	adult	Hadza	HG	33	MALE	Smits2017	NA	SRR5760917	24383	illumina	v4	515F 806R
SRR5760918	TZ_HADZA_3245	human	child	Hadza	HG	5	FEMALE	Smits2017	NA	SRR5760918	19214	illumina	v4	515F 806R
SRR5760919	TZ_HADZA_3246	human	adult	Hadza	HG	15	MALE	Smits2017	NA	SRR5760919	23708	illumina	v4	515F 806R
SRR5760920	TZ_HADZA_3206	human	child	Hadza	HG	3.5	MALE	Smits2017	NA	SRR5760920	18921	illumina	v4	515F 806R
SRR5760921	TZ_HADZA_3244	human	adult	Hadza	HG	55	FEMALE	Smits2017	NA	SRR5760921	23441	illumina	v4	515F 806R
SRR5760922	TZ_HADZA_3249	human	adult	Hadza	HG	33	MALE	Smits2017	NA	SRR5760922	24657	illumina	v4	515F 806R
SRR5760923	TZ_HADZA_3255	human	adult	Hadza	HG	33	MALE	Smits2017	NA	SRR5760923	29940	illumina	v4	515F 806R
SRR5760924	TZ_HADZA_3247	human	adult	Hadza	HG	35	MALE	Smits2017	NA	SRR5760924	24615	illumina	v4	515F 806R
SRR5760925	TZ_HADZA_3248	human	adult	Hadza	HG	40	MALE	Smits2017	NA	SRR5760925	18808	illumina	v4	515F 806R
SRR5760926	TZ_HADZA_831	human	child	Hadza	HG	6	FEMALE	Smits2017	NA	SRR5760926	16743	illumina	v4	515F 806R
SRR5760927	TZ_HADZA_830	human	adolescent	Hadza	HG	13	MALE	Smits2017	NA	SRR5760927	16331	illumina	v4	515F 806R
SRR5760928	TZ_HADZA_829	human	adult	Hadza	HG	49	FEMALE	Smits2017	NA	SRR5760928	18252	illumina	v4	515F 806R
SRR5760929	TZ_HADZA_828	human	adult	Hadza	HG	33	MALE	Smits2017	NA	SRR5760929	14429	illumina	v4	515F 806R
SRR5760930	TZ_HADZA_826	human	child	Hadza	HG	7	MALE	Smits2017	NA	SRR5760930	16904	illumina	v4	515F 806R
SRR5760931	TZ_HADZA_822	human	child	Hadza	HG	4	MALE	Smits2017	NA	SRR5760931	15459	illumina	v4	515F 806R
SRR5760932	TZ_HADZA_821	human	child	Hadza	HG	6	FEMALE	Smits2017	NA	SRR5760932	18118	illumina	v4	515F 806R
SRR5760933	TZ_HADZA_820	human	adult	Hadza	HG	30	FEMALE	Smits2017	NA	SRR5760933	16017	illumina	v4	515F 806R
SRR5760934	TZ_HADZA_833	human	adult	Hadza	HG	20	MALE	Smits2017	NA	SRR5760934	15258	illumina	v4	515F 806R
SRR5760935	TZ_HADZA_832	human	adult	Hadza	HG	38	FEMALE	Smits2017	NA	SRR5760935	15033	illumina	v4	515F 806R
SRR5760936	TZ_HADZA_272	human	adult	Hadza	HG	na	FEMALE	Smits2017	NA	SRR5760936	26840	illumina	v4	515F 806R
SRR5760937	TZ_HADZA_274	human	child	Hadza	HG	7	MALE	Smits2017	NA	SRR5760937	31791	illumina	v4	515F 806R
SRR5760938	TZ_HADZA_258	human	adult	Hadza	HG	29	MALE	Smits2017	NA	SRR5760938	31844	illumina	v4	515F 806R
SRR5760939	TZ_HADZA_264	human	adult	Hadza	HG	30	MALE	Smits2017	NA	SRR5760939	29862	illumina	v4	515F 806R
SRR5760940	TZ_HADZA_256	human	child	Hadza	HG	6	FEMALE	Smits2017	NA	SRR5760940	26829	illumina	v4	515F 806R
SRR5760941	TZ_HADZA_257	human	adult	Hadza	HG	na	FEMALE	Smits2017	NA	SRR5760941	29743	illumina	v4	515F 806R
SRR5760942	TZ_HADZA_267	human	adult	Hadza	HG	45	FEMALE	Smits2017	NA	SRR5760942	33541	illumina	v4	515F 806R
SRR5760943	TZ_HADZA_270	human	child	Hadza	HG	9	MALE	Smits2017	NA	SRR5760943	29658	illumina	v4	515F 806R
SRR5760944	TZ_HADZA_265	human	adult	Hadza	HG	65	MALE	Smits2017	NA	SRR5760944	27184	illumina	v4	515F 806R
SRR5760945	TZ_HADZA_266	human	child	Hadza	HG	9	MALE	Smits2017	NA	SRR5760945	25367	illumina	v4	515F 806R
SRR5760946	TZ_HADZA_3018	human	adolescent	Hadza	HG	14	FEMALE	Smits2017	NA	SRR5760946	18174	illumina	v4	515F 806R
SRR5760947	TZ_HADZA_3035	human	adult	Hadza	HG	20	MALE	Smits2017	NA	SRR5760947	25127	illumina	v4	515F 806R
SRR5760948	TZ_HADZA_3040	human	adult	Hadza	HG	49	FEMALE	Smits2017	NA	SRR5760948	20700	illumina	v4	515F 806R
SRR5760949	TZ_HADZA_3389	human	adult	Hadza	HG	30	MALE	Smits2017	NA	SRR5760949	18661	illumina	v4	515F 806R
SRR5760950	TZ_HADZA_3019	human	child	Hadza	HG	3.5	FEMALE	Smits2017	NA	SRR5760950	22721	illumina	v4	515F 806R
SRR5760951	TZ_HADZA_3390	human	adult	Hadza	HG	25	MALE	Smits2017	NA	SRR5760951	18328	illumina	v4	515F 806R
SRR5760952	TZ_HADZA_3020	human	adult	Hadza	HG	32	FEMALE	Smits2017	NA	SRR5760952	17881	illumina	v4	515F 806R
SRR5760953	TZ_HADZA_3024	human	child	Hadza	HG	3.5	MALE	Smits2017	NA	SRR5760953	26758	illumina	v4	515F 806R
SRR5760954	TZ_HADZA_3400	human	adult	Hadza	HG	25	FEMALE	Smits2017	NA	SRR5760954	23903	illumina	v4	515F 806R
SRR5760955	TZ_HADZA_3039	human	child	Hadza	HG	3.5	FEMALE	Smits2017	NA	SRR5760955	17690	illumina	v4	515F 806R
SRR5760956	TZ_HADZA_383	human	adult	Hadza	HG	na	NA	Smits2017	NA	SRR5760956	29362	illumina	v4	515F 806R
SRR5760957	TZ_HADZA_384	human	adult	Hadza	HG	na	NA	Smits2017	NA	SRR5760957	30654	illumina	v4	515F 806R
SRR5760958	TZ_HADZA_227	human	adult	Hadza	HG	45	FEMALE	Smits2017	NA	SRR5760958	26906	illumina	v4	515F 806R
SRR5760959	TZ_HADZA_379	human	adult	Hadza	HG	na	NA	Smits2017	NA	SRR5760959	28251	illumina	v4	515F 806R
SRR5760960	TZ_HADZA_346	human	adult	Hadza	HG	na	NA	Smits2017	NA	SRR5760960	28366	illumina	v4	515F 806R
SRR5760961	TZ_HADZA_423	human	adult	Hadza	HG	na	NA	Smits2017	NA	SRR5760961	25569	illumina	v4	515F 806R
SRR5760962	TZ_HADZA_348	human	adult	Hadza	HG	na	NA	Smits2017	NA	SRR5760962	24373	illumina	v4	515F 806R
SRR5760963	TZ_HADZA_347	human	adult	Hadza	HG	na	NA	Smits2017	NA	SRR5760963	23527	illumina	v4	515F 806R
SRR5760964	TZ_HADZA_342	human	adult	Hadza	HG	na	NA	Smits2017	NA	SRR5760964	27017	illumina	v4	515F 806R
SRR5760965	TZ_HADZA_341	human	adult	Hadza	HG	na	NA	Smits2017	NA	SRR5760965	27754	illumina	v4	515F 806R
SRR5760966	TZ_HADZA_344	human	adult	Hadza	HG	na	NA	Smits2017	NA	SRR5760966	25738	illumina	v4	515F 806R
SRR5760967	TZ_HADZA_343	human	adult	Hadza	HG	na	NA	Smits2017	NA	SRR5760967	22553	illumina	v4	515F 806R
SRR5760968	TZ_HADZA_350	human	adult	Hadza	HG	na	NA	Smits2017	NA	SRR5760968	25083	illumina	v4	515F 806R
SRR5760969	TZ_HADZA_349	human	adult	Hadza	HG	na	NA	Smits2017	NA	SRR5760969	22877	illumina	v4	515F 806R
SRR5760970	TZ_HADZA_843	human	adult	Hadza	HG	23	FEMALE	Smits2017	NA	SRR5760970	13452	illumina	v4	515F 806R
SRR5760971	TZ_HADZA_844	human	adult	Hadza	HG	25	FEMALE	Smits2017	NA	SRR5760971	15061	illumina	v4	515F 806R
SRR5760972	TZ_HADZA_841	human	adult	Hadza	HG	55	FEMALE	Smits2017	NA	SRR5760972	16001	illumina	v4	515F 806R
SRR5760973	TZ_HADZA_842	human	child	Hadza	HG	5	FEMALE	Smits2017	NA	SRR5760973	17422	illumina	v4	515F 806R
SRR5760974	TZ_HADZA_838	human	adolescent	Hadza	HG	12	FEMALE	Smits2017	NA	SRR5760974	17163	illumina	v4	515F 806R
SRR5760975	TZ_HADZA_839	human	child	Hadza	HG	4	FEMALE	Smits2017	NA	SRR5760975	16692	illumina	v4	515F 806R
SRR5760976	TZ_HADZA_836	human	adult	Hadza	HG	38	FEMALE	Smits2017	NA	SRR5760976	16516	illumina	v4	515F 806R
SRR5760977	TZ_HADZA_837	human	child	Hadza	HG	6.5	MALE	Smits2017	NA	SRR5760977	17207	illumina	v4	515F 806R
SRR5760978	TZ_HADZA_834	human	adolescent	Hadza	HG	14	FEMALE	Smits2017	NA	SRR5760978	14554	illumina	v4	515F 806R
SRR5760979	TZ_HADZA_835	human	adult	Hadza	HG	37	MALE	Smits2017	NA	SRR5760979	12484	illumina	v4	515F 806R
SRR5760980	TZ_HADZA_3027	human	adult	Hadza	HG	65	FEMALE	Smits2017	NA	SRR5760980	24507	illumina	v4	515F 806R
SRR5760981	TZ_HADZA_3031	human	child	Hadza	HG	8	FEMALE	Smits2017	NA	SRR5760981	27653	illumina	v4	515F 806R
SRR5760982	TZ_HADZA_3025	human	adult	Hadza	HG	40	MALE	Smits2017	NA	SRR5760982	17763	illumina	v4	515F 806R
SRR5760983	TZ_HADZA_3026	human	adult	Hadza	HG	55	FEMALE	Smits2017	NA	SRR5760983	21818	illumina	v4	515F 806R
SRR5760984	TZ_HADZA_3021	human	child	Hadza	HG	8	FEMALE	Smits2017	NA	SRR5760984	22365	illumina	v4	515F 806R
SRR5760985	TZ_HADZA_3032	human	child	Hadza	HG	3.5	FEMALE	Smits2017	NA	SRR5760985	23270	illumina	v4	515F 806R
SRR5760986	TZ_HADZA_3397	human	child	Hadza	HG	6	FEMALE	Smits2017	NA	SRR5760986	17982	illumina	v4	515F 806R
SRR5760987	TZ_HADZA_3041	human	child	Hadza	HG	7	FEMALE	Smits2017	NA	SRR5760987	14463	illumina	v4	515F 806R
SRR5760988	TZ_HADZA_3034	human	child	Hadza	HG	7	FEMALE	Smits2017	NA	SRR5760988	26572	illumina	v4	515F 806R
SRR5760989	TZ_HADZA_3028	human	child	Hadza	HG	8	FEMALE	Smits2017	NA	SRR5760989	22426	illumina	v4	515F 806R
SRR5760990	TZ_HADZA_3101	human	child	Hadza	HG	4	FEMALE	Smits2017	NA	SRR5760990	21981	illumina	v4	515F 806R
SRR5760991	TZ_HADZA_3185	human	adult	Hadza	HG	39	FEMALE	Smits2017	NA	SRR5760991	20435	illumina	v4	515F 806R
SRR5760992	TZ_HADZA_3182	human	adult	Hadza	HG	48	FEMALE	Smits2017	NA	SRR5760992	20094	illumina	v4	515F 806R
SRR5760993	TZ_HADZA_3099	human	child	Hadza	HG	6	FEMALE	Smits2017	NA	SRR5760993	27349	illumina	v4	515F 806R
SRR5760994	TZ_HADZA_191	human	adult	Hadza	HG	23	FEMALE	Smits2017	NA	SRR5760994	26476	illumina	v4	515F 806R
SRR5760995	TZ_HADZA_3148	human	adult	Hadza	HG	38	FEMALE	Smits2017	NA	SRR5760995	18644	illumina	v4	515F 806R
SRR5760996	TZ_HADZA_3144	human	adult	Hadza	HG	32	FEMALE	Smits2017	NA	SRR5760996	22648	illumina	v4	515F 806R
SRR5760997	TZ_HADZA_189	human	adult	Hadza	HG	26	FEMALE	Smits2017	NA	SRR5760997	26086	illumina	v4	515F 806R
SRR5760998	TZ_HADZA_3186	human	child	Hadza	HG	6	FEMALE	Smits2017	NA	SRR5760998	17222	illumina	v4	515F 806R
SRR5760999	TZ_HADZA_3187	human	adolescent	Hadza	HG	12	MALE	Smits2017	NA	SRR5760999	18612	illumina	v4	515F 806R
SRR5761000	TZ_HADZA_3274	human	adult	Hadza	HG	32	FEMALE	Smits2017	NA	SRR5761000	22749	illumina	v4	515F 806R
SRR5761001	TZ_HADZA_3273	human	child	Hadza	HG	3.5	FEMALE	Smits2017	NA	SRR5761001	22364	illumina	v4	515F 806R
SRR5761002	TZ_HADZA_3265	human	adult	Hadza	HG	40	MALE	Smits2017	NA	SRR5761002	24589	illumina	v4	515F 806R
SRR5761003	TZ_HADZA_3264	human	adult	Hadza	HG	17	MALE	Smits2017	NA	SRR5761003	26185	illumina	v4	515F 806R
SRR5761004	TZ_HADZA_3267	human	adolescent	Hadza	HG	13	MALE	Smits2017	NA	SRR5761004	20272	illumina	v4	515F 806R
SRR5761005	TZ_HADZA_3266	human	adult	Hadza	HG	49	FEMALE	Smits2017	NA	SRR5761005	20790	illumina	v4	515F 806R
SRR5761006	TZ_HADZA_3270	human	child	Hadza	HG	8	FEMALE	Smits2017	NA	SRR5761006	19363	illumina	v4	515F 806R
SRR5761007	TZ_HADZA_3269	human	child	Hadza	HG	6	FEMALE	Smits2017	NA	SRR5761007	18960	illumina	v4	515F 806R
SRR5761008	TZ_HADZA_3272	human	child	Hadza	HG	8	FEMALE	Smits2017	NA	SRR5761008	32029	illumina	v4	515F 806R
SRR5761009	TZ_HADZA_3271	human	child	Hadza	HG	7	FEMALE	Smits2017	NA	SRR5761009	28042	illumina	v4	515F 806R
SRR5761010	TZ_HADZA_750	human	adult	Hadza	HG	na	MALE	Smits2017	NA	SRR5761010	20263	illumina	v4	515F 806R
SRR5761011	TZ_HADZA_751	human	adult	Hadza	HG	55	MALE	Smits2017	NA	SRR5761011	19201	illumina	v4	515F 806R
SRR5761012	TZ_HADZA_732	human	adult	Hadza	HG	32	MALE	Smits2017	NA	SRR5761012	14113	illumina	v4	515F 806R
SRR5761013	TZ_HADZA_733	human	adult	Hadza	HG	na	MALE	Smits2017	NA	SRR5761013	17872	illumina	v4	515F 806R
SRR5761014	TZ_HADZA_755	human	adult	Hadza	HG	na	FEMALE	Smits2017	NA	SRR5761014	21579	illumina	v4	515F 806R
SRR5761015	TZ_HADZA_756	human	adult	Hadza	HG	na	FEMALE	Smits2017	NA	SRR5761015	17761	illumina	v4	515F 806R
SRR5761016	TZ_HADZA_752	human	adult	Hadza	HG	na	MALE	Smits2017	NA	SRR5761016	22325	illumina	v4	515F 806R
SRR5761017	TZ_HADZA_754	human	child	Hadza	HG	4.5	MALE	Smits2017	NA	SRR5761017	21416	illumina	v4	515F 806R
SRR5761018	TZ_HADZA_758	human	child	Hadza	HG	4.5	FEMALE	Smits2017	NA	SRR5761018	19221	illumina	v4	515F 806R
SRR5761019	TZ_HADZA_770	human	child	Hadza	HG	6	FEMALE	Smits2017	NA	SRR5761019	16229	illumina	v4	515F 806R
SRR5761020	TZ_HADZA_775	human	child	Hadza	HG	4.5	MALE	Smits2017	NA	SRR5761020	17399	illumina	v4	515F 806R
SRR5761021	TZ_HADZA_777	human	child	Hadza	HG	7	FEMALE	Smits2017	NA	SRR5761021	16743	illumina	v4	515F 806R
SRR5761022	TZ_HADZA_771	human	adult	Hadza	HG	na	MALE	Smits2017	NA	SRR5761022	186474	illumina	v4	515F 806R
SRR5761023	TZ_HADZA_773	human	adult	Hadza	HG	na	FEMALE	Smits2017	NA	SRR5761023	12894	illumina	v4	515F 806R
SRR5761024	TZ_HADZA_780	human	adult	Hadza	HG	15	FEMALE	Smits2017	NA	SRR5761024	17137	illumina	v4	515F 806R
SRR5761025	TZ_HADZA_781	human	child	Hadza	HG	6	MALE	Smits2017	NA	SRR5761025	19996	illumina	v4	515F 806R
SRR5761026	TZ_HADZA_778	human	adult	Hadza	HG	43	FEMALE	Smits2017	NA	SRR5761026	23689	illumina	v4	515F 806R
SRR5761027	TZ_HADZA_779	human	adult	Hadza	HG	50	FEMALE	Smits2017	NA	SRR5761027	19356	illumina	v4	515F 806R
SRR5761028	TZ_HADZA_782	human	adult	Hadza	HG	na	FEMALE	Smits2017	NA	SRR5761028	23061	illumina	v4	515F 806R
SRR5761029	TZ_HADZA_783	human	child	Hadza	HG	8	MALE	Smits2017	NA	SRR5761029	15150	illumina	v4	515F 806R
SRR5761030	TZ_HADZA_218	human	adolescent	Hadza	HG	12	MALE	Smits2017	NA	SRR5761030	29420	illumina	v4	515F 806R
SRR5761031	TZ_HADZA_217	human	adult	Hadza	HG	49	FEMALE	Smits2017	NA	SRR5761031	24378	illumina	v4	515F 806R
SRR5761032	TZ_HADZA_220	human	child	Hadza	HG	6	FEMALE	Smits2017	NA	SRR5761032	26821	illumina	v4	515F 806R
SRR5761033	TZ_HADZA_219	human	adult	Hadza	HG	48	FEMALE	Smits2017	NA	SRR5761033	28795	illumina	v4	515F 806R
SRR5761034	TZ_HADZA_222	human	child	Hadza	HG	4	FEMALE	Smits2017	NA	SRR5761034	26215	illumina	v4	515F 806R
SRR5761035	TZ_HADZA_221	human	adult	Hadza	HG	na	FEMALE	Smits2017	NA	SRR5761035	28826	illumina	v4	515F 806R
SRR5761036	TZ_HADZA_225	human	adult	Hadza	HG	65	MALE	Smits2017	NA	SRR5761036	30489	illumina	v4	515F 806R
SRR5761037	TZ_HADZA_223	human	adult	Hadza	HG	40	MALE	Smits2017	NA	SRR5761037	29439	illumina	v4	515F 806R
SRR5761038	TZ_HADZA_378	human	child	Hadza	HG		NA	Smits2017	NA	SRR5761038	27329	illumina	v4	515F 806R
SRR5761039	TZ_HADZA_226	human	adult	Hadza	HG	55	MALE	Smits2017	NA	SRR5761039	25775	illumina	v4	515F 806R
SRR5761040	TZ_HADZA_381	human	adult	Hadza	HG	na	NA	Smits2017	NA	SRR5761040	27728	illumina	v4	515F 806R
SRR5761041	TZ_HADZA_382	human	adult	Hadza	HG	na	NA	Smits2017	NA	SRR5761041	23938	illumina	v4	515F 806R
SRR5761042	TZ_HADZA_374	human	adult	Hadza	HG	na	NA	Smits2017	NA	SRR5761042	28782	illumina	v4	515F 806R
SRR5761043	TZ_HADZA_375	human	adult	Hadza	HG	na	NA	Smits2017	NA	SRR5761043	27852	illumina	v4	515F 806R
SRR5761044	TZ_HADZA_376	human	adult	Hadza	HG	na	NA	Smits2017	NA	SRR5761044	22856	illumina	v4	515F 806R
SRR5761045	TZ_HADZA_377	human	adult	Hadza	HG	na	NA	Smits2017	NA	SRR5761045	29360	illumina	v4	515F 806R
SRR5761046	TZ_HADZA_255	human	child	Hadza	HG	4	FEMALE	Smits2017	NA	SRR5761046	26960	illumina	v4	515F 806R
SRR5761047	TZ_HADZA_254	human	adult	Hadza	HG	48	FEMALE	Smits2017	NA	SRR5761047	26962	illumina	v4	515F 806R
SRR5761048	TZ_HADZA_247	human	adolescent	Hadza	HG	12	MALE	Smits2017	NA	SRR5761048	28340	illumina	v4	515F 806R
SRR5761049	TZ_HADZA_246	human	adult	Hadza	HG	35	MALE	Smits2017	NA	SRR5761049	29104	illumina	v4	515F 806R
SRR5761050	TZ_HADZA_396	human	adult	Hadza	HG	32	MALE	Smits2017	NA	SRR5761050	36481	illumina	v4	515F 806R
SRR5761051	TZ_HADZA_248	human	adult	Hadza	HG	55	MALE	Smits2017	NA	SRR5761051	28052	illumina	v4	515F 806R
SRR5761052	TZ_HADZA_251	human	adult	Hadza	HG	40	MALE	Smits2017	NA	SRR5761052	26314	illumina	v4	515F 806R
SRR5761053	TZ_HADZA_250	human	adult	Hadza	HG	49	MALE	Smits2017	NA	SRR5761053	28911	illumina	v4	515F 806R
SRR5761054	TZ_HADZA_253	human	adult	Hadza	HG	32	MALE	Smits2017	NA	SRR5761054	23420	illumina	v4	515F 806R
SRR5761055	TZ_HADZA_252	human	adult	Hadza	HG	49	FEMALE	Smits2017	NA	SRR5761055	27157	illumina	v4	515F 806R
SRR5761056	TZ_HADZA_154	human	adolescent	Hadza	HG	10	MALE	Smits2017	NA	SRR5761056	17010	illumina	v4	515F 806R
SRR5761057	TZ_HADZA_117	human	child	Hadza	HG	4.5	MALE	Smits2017	NA	SRR5761057	12503	illumina	v4	515F 806R
SRR5761058	TZ_HADZA_149	human	adult	Hadza	HG	16	FEMALE	Smits2017	NA	SRR5761058	21702	illumina	v4	515F 806R
SRR5761059	TZ_HADZA_111	human	adult	Hadza	HG	18	FEMALE	Smits2017	NA	SRR5761059	18432	illumina	v4	515F 806R
SRR5761060	TZ_HADZA_147	human	adult	Hadza	HG	22	FEMALE	Smits2017	NA	SRR5761060	18829	illumina	v4	515F 806R
SRR5761061	TZ_HADZA_148	human	adult	Hadza	HG	17	FEMALE	Smits2017	NA	SRR5761061	21549	illumina	v4	515F 806R
SRR5761062	TZ_HADZA_152	human	adolescent	Hadza	HG	12	FEMALE	Smits2017	NA	SRR5761062	17869	illumina	v4	515F 806R
SRR5761063	TZ_HADZA_153	human	child	Hadza	HG	6	MALE	Smits2017	NA	SRR5761063	18925	illumina	v4	515F 806R
SRR5761064	TZ_HADZA_150	human	adult	Hadza	HG	24	FEMALE	Smits2017	NA	SRR5761064	18739	illumina	v4	515F 806R
SRR5761065	TZ_HADZA_151	human	adolescent	Hadza	HG	12	FEMALE	Smits2017	NA	SRR5761065	22743	illumina	v4	515F 806R
SRR5761066	TZ_HADZA_145	human	adult	Hadza	HG	63	FEMALE	Smits2017	NA	SRR5761066	17226	illumina	v4	515F 806R
SRR5761067	TZ_HADZA_107	human	child	Hadza	HG	7	MALE	Smits2017	NA	SRR5761067	20791	illumina	v4	515F 806R
SRR5761068	TZ_HADZA_136	human	adult	Hadza	HG	40	FEMALE	Smits2017	NA	SRR5761068	16982	illumina	v4	515F 806R
SRR5761069	TZ_HADZA_138	human	child	Hadza	HG	5	FEMALE	Smits2017	NA	SRR5761069	18711	illumina	v4	515F 806R
SRR5761070	TZ_HADZA_132	human	adult	Hadza	HG	25	FEMALE	Smits2017	NA	SRR5761070	15317	illumina	v4	515F 806R
SRR5761071	TZ_HADZA_135	human	adult	Hadza	HG	45	FEMALE	Smits2017	NA	SRR5761071	17399	illumina	v4	515F 806R
SRR5761072	TZ_HADZA_100	human	child	Hadza	HG	6	MALE	Smits2017	NA	SRR5761072	26200	illumina	v4	515F 806R
SRR5761073	TZ_HADZA_101	human	adult	Hadza	HG	25	FEMALE	Smits2017	NA	SRR5761073	19064	illumina	v4	515F 806R
SRR5761074	TZ_HADZA_139	human	adult	Hadza	HG	45	FEMALE	Smits2017	NA	SRR5761074	20006	illumina	v4	515F 806R
SRR5761075	TZ_HADZA_99	human	adult	Hadza	HG	40	FEMALE	Smits2017	NA	SRR5761075	20260	illumina	v4	515F 806R
SRR5761076	TZ_HADZA_203	human	adult	Hadza	HG	65	MALE	Smits2017	NA	SRR5761076	33108	illumina	v4	515F 806R
SRR5761077	TZ_HADZA_200	human	child	Hadza	HG	9	MALE	Smits2017	NA	SRR5761077	29988	illumina	v4	515F 806R
SRR5761078	TZ_HADZA_199	human	child	Hadza	HG	9	MALE	Smits2017	NA	SRR5761078	29584	illumina	v4	515F 806R
SRR5761079	TZ_HADZA_198	human	adult	Hadza	HG	45	FEMALE	Smits2017	NA	SRR5761079	26512	illumina	v4	515F 806R
SRR5761080	TZ_HADZA_197	human	adult	Hadza	HG	55	MALE	Smits2017	NA	SRR5761080	32545	illumina	v4	515F 806R
SRR5761081	TZ_HADZA_196	human	adult	Hadza	HG	30	MALE	Smits2017	NA	SRR5761081	33215	illumina	v4	515F 806R
SRR5761082	TZ_HADZA_3110	human	child	Hadza	HG	5	FEMALE	Smits2017	NA	SRR5761082	21696	illumina	v4	515F 806R
SRR5761083	TZ_HADZA_3109	human	adolescent	Hadza	HG	14	FEMALE	Smits2017	NA	SRR5761083	23324	illumina	v4	515F 806R
SRR5761084	TZ_HADZA_3108	human	child	Hadza	HG	4	MALE	Smits2017	NA	SRR5761084	28077	illumina	v4	515F 806R
SRR5761085	TZ_HADZA_3188	human	adult	Hadza	HG	32	FEMALE	Smits2017	NA	SRR5761085	22515	illumina	v4	515F 806R
SRR5761086	TZ_HADZA_330	human	adult	Hadza	HG	31	FEMALE	Smits2017	NA	SRR5761086	25004	illumina	v4	515F 806R
SRR5761087	TZ_HADZA_331	human	child	Hadza	HG	7	MALE	Smits2017	NA	SRR5761087	30331	illumina	v4	515F 806R
SRR5761088	TZ_HADZA_332	human	adult	Hadza	HG	na	NA	Smits2017	NA	SRR5761088	27358	illumina	v4	515F 806R
SRR5761089	TZ_HADZA_333	human	adult	Hadza	HG	na	NA	Smits2017	NA	SRR5761089	21920	illumina	v4	515F 806R
SRR5761090	TZ_HADZA_334	human	adult	Hadza	HG	na	NA	Smits2017	NA	SRR5761090	24970	illumina	v4	515F 806R
SRR5761091	TZ_HADZA_335	human	adult	Hadza	HG	na	NA	Smits2017	NA	SRR5761091	26169	illumina	v4	515F 806R
SRR5761092	TZ_HADZA_336	human	adult	Hadza	HG	na	NA	Smits2017	NA	SRR5761092	27699	illumina	v4	515F 806R
SRR5761093	TZ_HADZA_337	human	adult	Hadza	HG	na	NA	Smits2017	NA	SRR5761093	30258	illumina	v4	515F 806R
SRR5761094	TZ_HADZA_338	human	adult	Hadza	HG	na	NA	Smits2017	NA	SRR5761094	22248	illumina	v4	515F 806R
SRR5761095	TZ_HADZA_340	human	adult	Hadza	HG	na	NA	Smits2017	NA	SRR5761095	23811	illumina	v4	515F 806R
SRR5761096	TZ_HADZA_860	human	adult	Hadza	HG	37	MALE	Smits2017	NA	SRR5761096	14102	illumina	v4	515F 806R
SRR5761097	TZ_HADZA_859	human	adolescent	Hadza	HG	14	FEMALE	Smits2017	NA	SRR5761097	13618	illumina	v4	515F 806R
SRR5761098	TZ_HADZA_852	human	adult	Hadza	HG	58	MALE	Smits2017	NA	SRR5761098	16428	illumina	v4	515F 806R
SRR5761099	TZ_HADZA_851	human	adult	Hadza	HG	35	MALE	Smits2017	NA	SRR5761099	12152	illumina	v4	515F 806R
SRR5761100	TZ_HADZA_858	human	adult	Hadza	HG	20	MALE	Smits2017	NA	SRR5761100	12611	illumina	v4	515F 806R
SRR5761101	TZ_HADZA_857	human	adult	Hadza	HG	38	FEMALE	Smits2017	NA	SRR5761101	14797	illumina	v4	515F 806R
SRR5761102	TZ_HADZA_848	human	adult	Hadza	HG	40	MALE	Smits2017	NA	SRR5761102	12991	illumina	v4	515F 806R
SRR5761103	TZ_HADZA_845	human	child	Hadza	HG	3.5	MALE	Smits2017	NA	SRR5761103	15398	illumina	v4	515F 806R
SRR5761104	TZ_HADZA_850	human	adult	Hadza	HG	17	MALE	Smits2017	NA	SRR5761104	17068	illumina	v4	515F 806R
SRR5761105	TZ_HADZA_849	human	adult	Hadza	HG	15	MALE	Smits2017	NA	SRR5761105	16899	illumina	v4	515F 806R
SRR5761106	TZ_HADZA_3396	human	child	Hadza	HG	7	MALE	Smits2017	NA	SRR5761106	24286	illumina	v4	515F 806R
SRR5761107	TZ_HADZA_3022	human	adult	Hadza	HG	33	MALE	Smits2017	NA	SRR5761107	21245	illumina	v4	515F 806R
SRR5761108	TZ_HADZA_3391	human	adult	Hadza	HG	15	MALE	Smits2017	NA	SRR5761108	21588	illumina	v4	515F 806R
SRR5761109	TZ_HADZA_3395	human	adult	Hadza	HG	23	FEMALE	Smits2017	NA	SRR5761109	25912	illumina	v4	515F 806R
SRR5761110	TZ_HADZA_3398	human	adult	Hadza	HG	30	FEMALE	Smits2017	NA	SRR5761110	22199	illumina	v4	515F 806R
SRR5761111	TZ_HADZA_3305	human	child	Hadza	HG	5	FEMALE	Smits2017	NA	SRR5761111	20336	illumina	v4	515F 806R
SRR5761112	TZ_HADZA_3399	human	child	Hadza	HG	4	MALE	Smits2017	NA	SRR5761112	25702	illumina	v4	515F 806R
SRR5761113	TZ_HADZA_3030	human	child	Hadza	HG	6	FEMALE	Smits2017	NA	SRR5761113	25079	illumina	v4	515F 806R
SRR5761114	TZ_HADZA_3044	human	adult	Hadza	HG	33	MALE	Smits2017	NA	SRR5761114	21601	illumina	v4	515F 806R
SRR5761115	TZ_HADZA_3042	human	adult	Hadza	HG	58	MALE	Smits2017	NA	SRR5761115	20438	illumina	v4	515F 806R
SRR5761116	TZ_HADZA_121	human	adult	Hadza	HG	61	MALE	Smits2017	NA	SRR5761116	20091	illumina	v4	515F 806R
SRR5761117	TZ_HADZA_157	human	adult	Hadza	HG	21	MALE	Smits2017	NA	SRR5761117	18451	illumina	v4	515F 806R
SRR5761118	TZ_HADZA_156	human	adult	Hadza	HG	25	MALE	Smits2017	NA	SRR5761118	19151	illumina	v4	515F 806R
SRR5761119	TZ_HADZA_155	human	adult	Hadza	HG	35	MALE	Smits2017	NA	SRR5761119	19414	illumina	v4	515F 806R
SRR5761120	TZ_HADZA_162	human	adult	Hadza	HG	21	MALE	Smits2017	NA	SRR5761120	20649	illumina	v4	515F 806R
SRR5761121	TZ_HADZA_161	human	adult	Hadza	HG	45	MALE	Smits2017	NA	SRR5761121	20343	illumina	v4	515F 806R
SRR5761122	TZ_HADZA_123	human	adult	Hadza	HG	47	MALE	Smits2017	NA	SRR5761122	17542	illumina	v4	515F 806R
SRR5761123	TZ_HADZA_435	human	adult	Hadza	HG	48	MALE	Smits2017	NA	SRR5761123	42908	illumina	v4	515F 806R
SRR5761124	TZ_HADZA_127	human	adult	Hadza	HG	57	MALE	Smits2017	NA	SRR5761124	17080	illumina	v4	515F 806R
SRR5761125	TZ_HADZA_163	human	adult	Hadza	HG	18	MALE	Smits2017	NA	SRR5761125	17106	illumina	v4	515F 806R
SRR5761126	TZ_HADZA_867	human	adult	Hadza	HG	30	FEMALE	Smits2017	NA	SRR5761126	18917	illumina	v4	515F 806R
SRR5761127	TZ_HADZA_868	human	child	Hadza	HG	6	FEMALE	Smits2017	NA	SRR5761127	11250	illumina	v4	515F 806R
SRR5761128	TZ_HADZA_869	human	child	Hadza	HG	4	MALE	Smits2017	NA	SRR5761128	14742	illumina	v4	515F 806R
SRR5761129	TZ_HADZA_873	human	child	Hadza	HG	7	MALE	Smits2017	NA	SRR5761129	14994	illumina	v4	515F 806R
SRR5761130	TZ_HADZA_861	human	adult	Hadza	HG	32	FEMALE	Smits2017	NA	SRR5761130	15450	illumina	v4	515F 806R
SRR5761131	TZ_HADZA_862	human	adult	Hadza	HG	30	MALE	Smits2017	NA	SRR5761131	16934	illumina	v4	515F 806R
SRR5761132	TZ_HADZA_863	human	child	Hadza	HG	5	MALE	Smits2017	NA	SRR5761132	20843	illumina	v4	515F 806R
SRR5761133	TZ_HADZA_864	human	child	Hadza	HG	3.5	FEMALE	Smits2017	NA	SRR5761133	16886	illumina	v4	515F 806R
SRR5761134	TZ_HADZA_875	human	adult	Hadza	HG	33	MALE	Smits2017	NA	SRR5761134	18220	illumina	v4	515F 806R
SRR5761135	TZ_HADZA_876	human	adult	Hadza	HG	45	FEMALE	Smits2017	NA	SRR5761135	17616	illumina	v4	515F 806R
SRR5761136	TZ_HADZA_597	human	adult	Hadza	HG	na	NA	Smits2017	NA	SRR5761136	17752	illumina	v4	515F 806R
SRR5761137	TZ_HADZA_596	human	adult	Hadza	HG	na	NA	Smits2017	NA	SRR5761137	16034	illumina	v4	515F 806R
SRR5761138	TZ_HADZA_599	human	adult	Hadza	HG	na	NA	Smits2017	NA	SRR5761138	19228	illumina	v4	515F 806R
SRR5761139	TZ_HADZA_598	human	adult	Hadza	HG	na	NA	Smits2017	NA	SRR5761139	20548	illumina	v4	515F 806R
SRR5761140	TZ_HADZA_717	human	adult	Hadza	HG	na	MALE	Smits2017	NA	SRR5761140	13872	illumina	v4	515F 806R
SRR5761141	TZ_HADZA_716	human	adult	Hadza	HG	47	MALE	Smits2017	NA	SRR5761141	40478	illumina	v4	515F 806R
SRR5761142	TZ_HADZA_726	human	adult	Hadza	HG	21	MALE	Smits2017	NA	SRR5761142	17446	illumina	v4	515F 806R
SRR5761143	TZ_HADZA_718	human	adult	Hadza	HG	32	MALE	Smits2017	NA	SRR5761143	20129	illumina	v4	515F 806R
SRR5761144	TZ_HADZA_728	human	adult	Hadza	HG	30	MALE	Smits2017	NA	SRR5761144	34118	illumina	v4	515F 806R
SRR5761145	TZ_HADZA_727	human	adult	Hadza	HG	22	MALE	Smits2017	NA	SRR5761145	15823	illumina	v4	515F 806R
SRR5761146	TZ_HADZA_785	human	adult	Hadza	HG	19	FEMALE	Smits2017	NA	SRR5761146	19545	illumina	v4	515F 806R
SRR5761147	TZ_HADZA_784	human	child	Hadza	HG	6	MALE	Smits2017	NA	SRR5761147	20387	illumina	v4	515F 806R
SRR5761148	TZ_HADZA_787	human	adult	Hadza	HG	25	FEMALE	Smits2017	NA	SRR5761148	21581	illumina	v4	515F 806R
SRR5761149	TZ_HADZA_786	human	adult	Hadza	HG	19	FEMALE	Smits2017	NA	SRR5761149	17136	illumina	v4	515F 806R
SRR5761150	TZ_HADZA_793	human	adult	Hadza	HG	na	MALE	Smits2017	NA	SRR5761150	15865	illumina	v4	515F 806R
SRR5761151	TZ_HADZA_791	human	adult	Hadza	HG	18	FEMALE	Smits2017	NA	SRR5761151	16340	illumina	v4	515F 806R
SRR5761152	TZ_HADZA_798	human	adult	Hadza	HG	25	MALE	Smits2017	NA	SRR5761152	17842	illumina	v4	515F 806R
SRR5761153	TZ_HADZA_794	human	adult	Hadza	HG	45	MALE	Smits2017	NA	SRR5761153	18508	illumina	v4	515F 806R
SRR5761154	TZ_HADZA_804	human	adult	Hadza	HG	33	MALE	Smits2017	NA	SRR5761154	19137	illumina	v4	515F 806R
SRR5761155	TZ_HADZA_801	human	adult	Hadza	HG	24	MALE	Smits2017	NA	SRR5761155	18135	illumina	v4	515F 806R
SRR5761156	TZ_HADZA_233	human	adult	Hadza	HG	na	MALE	Smits2017	NA	SRR5761156	30783	illumina	v4	515F 806R
SRR5761157	TZ_HADZA_234	human	adult	Hadza	HG	na	FEMALE	Smits2017	NA	SRR5761157	30742	illumina	v4	515F 806R
SRR5761158	TZ_HADZA_3016	human	adult	Hadza	HG	na	NA	Smits2017	NA	SRR5761158	16437	illumina	v4	515F 806R
SRR5761159	TZ_HADZA_372	human	adult	Hadza	HG	na	NA	Smits2017	NA	SRR5761159	22985	illumina	v4	515F 806R
SRR5761160	TZ_HADZA_239	human	adult	Hadza	HG	18	MALE	Smits2017	NA	SRR5761160	25032	illumina	v4	515F 806R
SRR5761161	TZ_HADZA_240	human	adult	Hadza	HG	na	FEMALE	Smits2017	NA	SRR5761161	25389	illumina	v4	515F 806R
SRR5761162	TZ_HADZA_235	human	adult	Hadza	HG	61	MALE	Smits2017	NA	SRR5761162	25601	illumina	v4	515F 806R
SRR5761163	TZ_HADZA_236	human	child	Hadza	HG	7	MALE	Smits2017	NA	SRR5761163	26561	illumina	v4	515F 806R
SRR5761164	TZ_HADZA_367	human	adult	Hadza	HG	na	NA	Smits2017	NA	SRR5761164	28592	illumina	v4	515F 806R
SRR5761165	TZ_HADZA_366	human	adult	Hadza	HG	na	NA	Smits2017	NA	SRR5761165	24586	illumina	v4	515F 806R
SRR5761166	TZ_HADZA_365	human	adult	Hadza	HG	na	NA	Smits2017	NA	SRR5761166	26392	illumina	v4	515F 806R
SRR5761167	TZ_HADZA_364	human	adult	Hadza	HG	na	NA	Smits2017	NA	SRR5761167	27623	illumina	v4	515F 806R
SRR5761168	TZ_HADZA_371	human	adult	Hadza	HG	na	NA	Smits2017	NA	SRR5761168	29253	illumina	v4	515F 806R
SRR5761169	TZ_HADZA_370	human	adult	Hadza	HG	na	NA	Smits2017	NA	SRR5761169	23317	illumina	v4	515F 806R
SRR5761170	TZ_HADZA_369	human	adult	Hadza	HG	na	NA	Smits2017	NA	SRR5761170	21982	illumina	v4	515F 806R
SRR5761171	TZ_HADZA_3015	human	adult	Hadza	HG	na	NA	Smits2017	NA	SRR5761171	19129	illumina	v4	515F 806R
SRR5761172	TZ_HADZA_3303	human	adult	Hadza	HG	45	FEMALE	Smits2017	NA	SRR5761172	18773	illumina	v4	515F 806R
SRR5761173	TZ_HADZA_3304	human	adult	Hadza	HG	55	FEMALE	Smits2017	NA	SRR5761173	18276	illumina	v4	515F 806R
SRR5761174	TZ_HADZA_3298	human	adult	Hadza	HG	20	MALE	Smits2017	NA	SRR5761174	22162	illumina	v4	515F 806R
SRR5761175	TZ_HADZA_3299	human	adolescent	Hadza	HG	14	FEMALE	Smits2017	NA	SRR5761175	24206	illumina	v4	515F 806R
SRR5761176	TZ_HADZA_3300	human	adult	Hadza	HG	37	MALE	Smits2017	NA	SRR5761176	22341	illumina	v4	515F 806R
SRR5761177	TZ_HADZA_3302	human	adult	Hadza	HG	58	MALE	Smits2017	NA	SRR5761177	23087	illumina	v4	515F 806R
SRR5761178	TZ_HADZA_3293	human	child	Hadza	HG	4	MALE	Smits2017	NA	SRR5761178	19965	illumina	v4	515F 806R
SRR5761179	TZ_HADZA_3294	human	child	Hadza	HG	6	FEMALE	Smits2017	NA	SRR5761179	27356	illumina	v4	515F 806R
SRR5761180	TZ_HADZA_3296	human	adult	Hadza	HG	35	MALE	Smits2017	NA	SRR5761180	20987	illumina	v4	515F 806R
SRR5761181	TZ_HADZA_3297	human	adult	Hadza	HG	38	FEMALE	Smits2017	NA	SRR5761181	20037	illumina	v4	515F 806R
SRR5761182	TZ_HADZA_215	human	adult	Hadza	HG	49	MALE	Smits2017	NA	SRR5761182	28094	illumina	v4	515F 806R
SRR5761183	TZ_HADZA_216	human	adult	Hadza	HG	32	MALE	Smits2017	NA	SRR5761183	23521	illumina	v4	515F 806R
SRR5761184	TZ_HADZA_394	human	adult	Hadza	HG	21	MALE	Smits2017	NA	SRR5761184	38938	illumina	v4	515F 806R
SRR5761185	TZ_HADZA_205	human	adult	Hadza	HG	18	MALE	Smits2017	NA	SRR5761185	24032	illumina	v4	515F 806R
SRR5761186	TZ_HADZA_206	human	adult	Hadza	HG	na	MALE	Smits2017	NA	SRR5761186	23032	illumina	v4	515F 806R
SRR5761187	TZ_HADZA_207	human	adult	Hadza	HG	na	FEMALE	Smits2017	NA	SRR5761187	34571	illumina	v4	515F 806R
SRR5761188	TZ_HADZA_211	human	adult	Hadza	HG	55	FEMALE	Smits2017	NA	SRR5761188	31941	illumina	v4	515F 806R
SRR5761189	TZ_HADZA_212	human	adult	Hadza	HG	18	FEMALE	Smits2017	NA	SRR5761189	27763	illumina	v4	515F 806R
SRR5761190	TZ_HADZA_213	human	adult	Hadza	HG	35	MALE	Smits2017	NA	SRR5761190	28171	illumina	v4	515F 806R
SRR5761191	TZ_HADZA_214	human	adult	Hadza	HG	29	MALE	Smits2017	NA	SRR5761191	26307	illumina	v4	515F 806R
SRR5761192	TZ_HADZA_818	human	child	Hadza	HG	8	FEMALE	Smits2017	NA	SRR5761192	14564	illumina	v4	515F 806R
SRR5761193	TZ_HADZA_819	human	child	Hadza	HG	5	FEMALE	Smits2017	NA	SRR5761193	15079	illumina	v4	515F 806R
SRR5761194	TZ_HADZA_807	human	adult	Hadza	HG	32	FEMALE	Smits2017	NA	SRR5761194	16370	illumina	v4	515F 806R
SRR5761195	TZ_HADZA_808	human	adult	Hadza	HG	30	MALE	Smits2017	NA	SRR5761195	14715	illumina	v4	515F 806R
SRR5761196	TZ_HADZA_1283	human	child	Hadza	HG	5	MALE	Smits2017	NA	SRR5761196	26979	illumina	v4	515F 806R
SRR5761197	TZ_HADZA_811	human	child	Hadza	HG	3.5	FEMALE	Smits2017	NA	SRR5761197	17137	illumina	v4	515F 806R
SRR5761198	TZ_HADZA_814	human	adult	Hadza	HG	45	FEMALE	Smits2017	NA	SRR5761198	18944	illumina	v4	515F 806R
SRR5761199	TZ_HADZA_815	human	adult	Hadza	HG	48	FEMALE	Smits2017	NA	SRR5761199	15249	illumina	v4	515F 806R
SRR5761200	TZ_HADZA_816	human	child	Hadza	HG	8	FEMALE	Smits2017	NA	SRR5761200	13513	illumina	v4	515F 806R
SRR5761201	TZ_HADZA_817	human	child	Hadza	HG	7	FEMALE	Smits2017	NA	SRR5761201	15612	illumina	v4	515F 806R
SRR5383655	299	human	adult	Shuar	rural	30	female	Stagaman2016	6	SRR5383655	95914	illumina	v4	515F 806R
SRR5383656	296	human	adult	Shuar	mixed	48	female	Stagaman2016	3	SRR5383656	15207	illumina	v4	515F 806R
SRR5383657	295	human	adult	Shuar	mixed	24	female	Stagaman2016	1	SRR5383657	12800	illumina	v4	515F 806R
SRR5383658	294	human	adult	Shuar	mixed	30	female	Stagaman2016	7	SRR5383658	17112	illumina	v4	515F 806R
SRR5383659	293	human	adult	Shuar	mixed	47	female	Stagaman2016	7	SRR5383659	41690	illumina	v4	515F 806R
SRR5383660	292	human	adult	Shuar	mixed	34	female	Stagaman2016	3	SRR5383660	18371	illumina	v4	515F 806R
SRR5383661	291	human	adult	Shuar	mixed	28	female	Stagaman2016	5	SRR5383661	10972	illumina	v4	515F 806R
SRR5383662	290	human	child	Shuar	mixed	1	female	Stagaman2016	18	SRR5383662	13184	illumina	v4	515F 806R
SRR5383663	289	human	adult	Shuar	mixed	34	male	Stagaman2016	3	SRR5383663	9736	illumina	v4	515F 806R
SRR5383664	288	human	adult	Shuar	mixed	33	female	Stagaman2016	7	SRR5383664	4019	illumina	v4	515F 806R
SRR5383665	287	human	adult	Shuar	mixed	22	female	Stagaman2016	7	SRR5383665	5171	illumina	v4	515F 806R
SRR5383666	246	human	child	Shuar	mixed	4	male	Stagaman2016	6	SRR5383666	18048	illumina	v4	515F 806R
SRR5383667	245	human	child	Shuar	mixed	7	male	Stagaman2016	7	SRR5383667	9744	illumina	v4	515F 806R
SRR5383668	244	human	child	Shuar	rural	3	male	Stagaman2016	11	SRR5383668	35060	illumina	v4	515F 806R
SRR5383669	243	human	child	Shuar	mixed	7	female	Stagaman2016	7	SRR5383669	6213	illumina	v4	515F 806R
SRR5383670	242	human	adult	Shuar	mixed	21	female	Stagaman2016	5	SRR5383670	10608	illumina	v4	515F 806R
SRR5383671	241	human	child	Shuar	rural	2	female	Stagaman2016	12	SRR5383671	24358	illumina	v4	515F 806R
SRR5383672	240	human	child	Shuar	mixed	10	male	Stagaman2016	7	SRR5383672	17531	illumina	v4	515F 806R
SRR5383673	239	human	child	Shuar	mixed	5	male	Stagaman2016	5	SRR5383673	37652	illumina	v4	515F 806R
SRR5383674	238	human	child	Shuar	rural	7	female	Stagaman2016	11	SRR5383674	25649	illumina	v4	515F 806R
SRR5383675	237	human	child	Shuar	rural	9	female	Stagaman2016	16	SRR5383675	8652	illumina	v4	515F 806R
SRR5383676	236	human	child	Shuar	mixed	5	female	Stagaman2016	7	SRR5383676	11966	illumina	v4	515F 806R
SRR5383677	235	human	child	Shuar	mixed	4	male	Stagaman2016	2	SRR5383677	23310	illumina	v4	515F 806R
SRR5383678	234	human	adolescent	Shuar	mixed	12	male	Stagaman2016	2	SRR5383678	10063	illumina	v4	515F 806R
SRR5383679	233	human	adolescent	Shuar	mixed	12	female	Stagaman2016	3	SRR5383679	787457	illumina	v4	515F 806R
SRR5383680	232	human	child	Shuar	mixed	6	male	Stagaman2016	6	SRR5383680	13575	illumina	v4	515F 806R
SRR5383681	231	human	child	Shuar	mixed	10	male	Stagaman2016	7	SRR5383681	765	illumina	v4	515F 806R
SRR5383682	230	human	child	Shuar	mixed	8	female	Stagaman2016	3	SRR5383682	9100	illumina	v4	515F 806R
SRR5383683	229	human	child	Shuar	mixed	7	male	Stagaman2016	5	SRR5383683	21957	illumina	v4	515F 806R
SRR5383684	228	human	child	Shuar	mixed	6	female	Stagaman2016	6	SRR5383684	4310	illumina	v4	515F 806R
SRR5383685	227	human	adult	Shuar	mixed	54	female	Stagaman2016	5	SRR5383685	9756	illumina	v4	515F 806R
SRR5383686	226	human	child	Shuar	mixed	3	male	Stagaman2016	7	SRR5383686	16652	illumina	v4	515F 806R
SRR5383687	225	human	adolescent	Shuar	rural	11	female	Stagaman2016	16	SRR5383687	105458	illumina	v4	515F 806R
SRR5383688	224	human	child	Shuar	rural	3	female	Stagaman2016	13	SRR5383688	31519	illumina	v4	515F 806R
SRR5383689	223	human	child	Shuar	rural	6	female	Stagaman2016	14	SRR5383689	13633	illumina	v4	515F 806R
SRR5383690	222	human	adult	Shuar	rural	34	female	Stagaman2016	15	SRR5383690	6167	illumina	v4	515F 806R
SRR5383691	216	human	child	Shuar	rural	5	male	Stagaman2016	15	SRR5383691	4472	illumina	v4	515F 806R
SRR5383692	215	human	child	Shuar	rural	9	male	Stagaman2016	14	SRR5383692	83532	illumina	v4	515F 806R
SRR5383693	214	human	child	Shuar	rural	4	male	Stagaman2016	15	SRR5383693	17364	illumina	v4	515F 806R
SRR5383694	213	human	adult	Shuar	rural	64	female	Stagaman2016	14	SRR5383694	13197	illumina	v4	515F 806R
SRR5383695	212	human	adult	Shuar	rural	45	male	Stagaman2016	12	SRR5383695	11555	illumina	v4	515F 806R
SRR5383696	210	human	adult	Shuar	rural	42	female	Stagaman2016	12	SRR5383696	52808	illumina	v4	515F 806R
SRR5383697	209	human	child	Shuar	rural	4	male	Stagaman2016	14	SRR5383697	6774	illumina	v4	515F 806R
SRR5383698	208	human	adult	Shuar	rural	21	female	Stagaman2016	12	SRR5383698	16017	illumina	v4	515F 806R
SRR5383699	205	human	child	Shuar	rural	10	female	Stagaman2016	15	SRR5383699	73460	illumina	v4	515F 806R
SRR5383700	204	human	adolescent	Shuar	rural	13	male	Stagaman2016	10	SRR5383700	9104	illumina	v4	515F 806R
SRR5383701	203	human	child	Shuar	rural	6	male	Stagaman2016	13	SRR5383701	10813	illumina	v4	515F 806R
SRR5383702	202	human	child	Shuar	rural	7	male	Stagaman2016	14	SRR5383702	11980	illumina	v4	515F 806R
SRR5383703	201	human	child	Shuar	rural	4	male	Stagaman2016	15	SRR5383703	21216	illumina	v4	515F 806R
SRR5383704	200	human	adolescent	Shuar	rural	12	female	Stagaman2016	15	SRR5383704	8607	illumina	v4	515F 806R
SRR5383705	199	human	adult	Shuar	rural	18	female	Stagaman2016	12	SRR5383705	5480	illumina	v4	515F 806R
SRR5383706	198	human	adult	Shuar	rural	74	female	Stagaman2016	12	SRR5383706	18735	illumina	v4	515F 806R
SRR5383707	197	human	adult	Shuar	rural	44	male	Stagaman2016	15	SRR5383707	391	illumina	v4	515F 806R
SRR5383708	195	human	adult	Shuar	rural	15	female	Stagaman2016	12	SRR5383708	21921	illumina	v4	515F 806R
SRR5383709	194	human	adolescent	Shuar	rural	12	female	Stagaman2016	15	SRR5383709	11388	illumina	v4	515F 806R
SRR5383710	193	human	adult	Shuar	rural	30	female	Stagaman2016	10	SRR5383710	52014	illumina	v4	515F 806R
SRR5383711	192	human	child	Shuar	rural	8	male	Stagaman2016	11	SRR5383711	14058	illumina	v4	515F 806R
SRR5383712	191	human	adult	Shuar	rural	34	male	Stagaman2016	10	SRR5383712	26973	illumina	v4	515F 806R
SRR5383713	190	human	adult	Shuar	rural	64	male	Stagaman2016	9	SRR5383713	14819	illumina	v4	515F 806R
SRR5383714	189	human	adult	Shuar	rural	31	female	Stagaman2016	13	SRR5383714	32949	illumina	v4	515F 806R
SRR5383715	188	human	adult	Shuar	rural	17	female	Stagaman2016	12	SRR5383715	3514	illumina	v4	515F 806R
SRR5383716	187	human	child	Shuar	rural	7	male	Stagaman2016	15	SRR5383716	16424	illumina	v4	515F 806R
SRR5383717	186	human	adult	Shuar	rural	28	female	Stagaman2016	15	SRR5383717	35393	illumina	v4	515F 806R
SRR5383718	185	human	adult	Shuar	rural	44	male	Stagaman2016	15	SRR5383718	14556	illumina	v4	515F 806R
SRR5383719	183	human	adolescent	Shuar	rural	12	male	Stagaman2016	14	SRR5383719	36597	illumina	v4	515F 806R
SRR5383720	181	human	child	Shuar	rural	7	male	Stagaman2016	15	SRR5383720	2013	illumina	v4	515F 806R
SRR5383721	180	human	child	Shuar	rural	3	male	Stagaman2016	14	SRR5383721	3991	illumina	v4	515F 806R
SRR5383722	179	human	adult	Shuar	rural	30	female	Stagaman2016	11	SRR5383722	16115	illumina	v4	515F 806R
SRR5383723	178	human	adolescent	Shuar	rural	13	female	Stagaman2016	13	SRR5383723	12885	illumina	v4	515F 806R
SRR5383724	176	human	adolescent	Shuar	rural	12	female	Stagaman2016	15	SRR5383724	10590	illumina	v4	515F 806R
SRR5383725	175	human	child	Shuar	rural	4	male	Stagaman2016	15	SRR5383725	14176	illumina	v4	515F 806R
SRR5383726	174	human	adult	Shuar	rural	30	female	Stagaman2016	14	SRR5383726	8478	illumina	v4	515F 806R
SRR5383727	173	human	adolescent	Shuar	rural	11	male	Stagaman2016	14	SRR5383727	37528	illumina	v4	515F 806R
SRR5383728	171	human	child	Shuar	rural	6	male	Stagaman2016	14	SRR5383728	1530	illumina	v4	515F 806R
SRR5383729	169	human	child	Shuar	rural	4	male	Stagaman2016	12	SRR5383729	11430	illumina	v4	515F 806R
SRR5383730	168	human	adult	Shuar	rural	39	male	Stagaman2016	14	SRR5383730	6608	illumina	v4	515F 806R
SRR5383731	167	human	child	Shuar	rural	4	female	Stagaman2016	14	SRR5383731	2124	illumina	v4	515F 806R
SRR5383732	166	human	adult	Shuar	rural	48	female	Stagaman2016	15	SRR5383732	12111	illumina	v4	515F 806R
SRR5383733	165	human	child	Shuar	rural	10	female	Stagaman2016	14	SRR5383733	44194	illumina	v4	515F 806R
SRR5383734	164	human	adolescent	Shuar	rural	14	male	Stagaman2016	15	SRR5383734	3403	illumina	v4	515F 806R
SRR5383735	163	human	adolescent	Shuar	rural	12	female	Stagaman2016	11	SRR5383735	33693	illumina	v4	515F 806R
SRR5383736	161	human	adult	Shuar	rural	52	female	Stagaman2016	14	SRR5383736	12839	illumina	v4	515F 806R
SRR5383737	160	human	adult	Shuar	rural	31	male	Stagaman2016	14	SRR5383737	9522	illumina	v4	515F 806R
SRR5383738	159	human	adolescent	Shuar	rural	13	female	Stagaman2016	15	SRR5383738	30416	illumina	v4	515F 806R
SRR5383739	158	human	child	Shuar	rural	8	male	Stagaman2016	15	SRR5383739	32407	illumina	v4	515F 806R
SRR5383740	157	human	adult	Shuar	rural	29	female	Stagaman2016	15	SRR5383740	36350	illumina	v4	515F 806R
SRR5383741	156	human	adolescent	Shuar	rural	12	female	Stagaman2016	12	SRR5383741	35043	illumina	v4	515F 806R
SRR5383742	155	human	adult	Shuar	rural	38	female	Stagaman2016	15	SRR5383742	6706	illumina	v4	515F 806R
SRR5383743	154	human	child	Shuar	rural	8	female	Stagaman2016	14	SRR5383743	5947	illumina	v4	515F 806R
SRR5383744	153	human	adult	Shuar	rural	38	female	Stagaman2016	11	SRR5383744	28794	illumina	v4	515F 806R
SRR5383745	152	human	adult	Shuar	rural	47	male	Stagaman2016	17	SRR5383745	39919	illumina	v4	515F 806R
SRR5383746	151	human	child	Shuar	rural	4	female	Stagaman2016	15	SRR5383746	8859	illumina	v4	515F 806R
SRR5383747	150	human	adult	Shuar	mixed	38	male	Stagaman2016	7	SRR5383747	8372	illumina	v4	515F 806R
SRR5383748	136	human	adult	Shuar	mixed	28	male	Stagaman2016	7	SRR5383748	10355	illumina	v4	515F 806R
SRR5383749	133	human	adult	Shuar	rural	100	female	Stagaman2016	14	SRR5383749	4610	illumina	v4	515F 806R
SRR5383750	132	human	adult	Shuar	rural	25	male	Stagaman2016	13	SRR5383750	9115	illumina	v4	515F 806R
SRR5383751	131	human	child	Shuar	rural	6	female	Stagaman2016	16	SRR5383751	16084	illumina	v4	515F 806R
SRR5383752	130	human	child	Shuar	mixed	5	female	Stagaman2016	1	SRR5383752	5465	illumina	v4	515F 806R
SRR5383753	129	human	adolescent	Shuar	mixed	13	male	Stagaman2016	6	SRR5383753	23106	illumina	v4	515F 806R
SRR5383754	127	human	child	Shuar	mixed	5	female	Stagaman2016	4	SRR5383754	34741	illumina	v4	515F 806R
SRR5383755	126	human	child	Shuar	mixed	4	male	Stagaman2016	7	SRR5383755	16913	illumina	v4	515F 806R
SRR5383756	125	human	adolescent	Shuar	mixed	13	male	Stagaman2016	5	SRR5383756	25757	illumina	v4	515F 806R
SRR5383757	117	human	child	Shuar	mixed	9	female	Stagaman2016	5	SRR5383757	7335	illumina	v4	515F 806R
SRR5383758	116	human	child	Shuar	mixed	9	female	Stagaman2016	6	SRR5383758	54916	illumina	v4	515F 806R
SRR5383759	115	human	child	Shuar	rural	10	female	Stagaman2016	11	SRR5383759	21060	illumina	v4	515F 806R
SRR5383760	114	human	adolescent	Shuar	mixed	13	male	Stagaman2016	2	SRR5383760	3439	illumina	v4	515F 806R
SRR5383761	113	human	child	Shuar	mixed	6	male	Stagaman2016	2	SRR5383761	17597	illumina	v4	515F 806R
SRR5383762	112	human	child	Shuar	mixed	9	male	Stagaman2016	5	SRR5383762	6835	illumina	v4	515F 806R
SRR5383763	111	human	child	Shuar	rural	4	female	Stagaman2016	13	SRR5383763	23635	illumina	v4	515F 806R
SRR5383764	110	human	child	Shuar	mixed	6	male	Stagaman2016	1	SRR5383764	5288	illumina	v4	515F 806R
SRR5383765	109	human	child	Shuar	mixed	8	male	Stagaman2016	6	SRR5383765	24035	illumina	v4	515F 806R
SRR5383766	108	human	child	Shuar	mixed	9	male	Stagaman2016	5	SRR5383766	2812	illumina	v4	515F 806R
SRR5383767	106	human	child	Shuar	rural	4	male	Stagaman2016	14	SRR5383767	75888	illumina	v4	515F 806R
SRR5383768	104	human	child	Shuar	rural	5	male	Stagaman2016	14	SRR5383768	17499	illumina	v4	515F 806R
SRR5383769	102	human	child	Shuar	rural	5	female	Stagaman2016	11	SRR5383769	14125	illumina	v4	515F 806R
SRR5383770	101	human	child	Shuar	rural	8	male	Stagaman2016	17	SRR5383770	256926	illumina	v4	515F 806R
SRR5383771	100	human	child	Shuar	rural	10	male	Stagaman2016	13	SRR5383771	10740	illumina	v4	515F 806R
SRR5383772	99	human	child	Shuar	rural	10	female	Stagaman2016	10	SRR5383772	8519	illumina	v4	515F 806R
SRR5383773	98	human	child	Shuar	rural	4	male	Stagaman2016	11	SRR5383773	19016	illumina	v4	515F 806R
SRR5383774	97	human	adult	Shuar	rural	17	female	Stagaman2016	13	SRR5383774	10198	illumina	v4	515F 806R
SRR5383775	96	human	child	Shuar	rural	3	female	Stagaman2016	14	SRR5383775	59096	illumina	v4	515F 806R
SRR5383776	95	human	child	Shuar	rural	7	female	Stagaman2016	11	SRR5383776	5631	illumina	v4	515F 806R
SRR5383777	94	human	adult	Shuar	rural	29	female	Stagaman2016	11	SRR5383777	27463	illumina	v4	515F 806R
SRR5383778	93	human	adult	Shuar	rural	53	female	Stagaman2016	12	SRR5383778	3947	illumina	v4	515F 806R
SRR5383779	92	human	child	Shuar	rural	8	male	Stagaman2016	10	SRR5383779	6134	illumina	v4	515F 806R
SRR5383780	91	human	child	Shuar	rural	8	female	Stagaman2016	14	SRR5383780	4834	illumina	v4	515F 806R
SRR5383781	90	human	child	Shuar	rural	5	female	Stagaman2016	10	SRR5383781	12936	illumina	v4	515F 806R
SRR5383782	89	human	adolescent	Shuar	rural	12	male	Stagaman2016	13	SRR5383782	7924	illumina	v4	515F 806R
SRR5383783	88	human	child	Shuar	rural	10	male	Stagaman2016	17	SRR5383783	4467	illumina	v4	515F 806R
SRR5383784	87	human	child	Shuar	rural	8	female	Stagaman2016	13	SRR5383784	12741	illumina	v4	515F 806R
SRR5383785	86	human	adolescent	Shuar	rural	12	male	Stagaman2016	11	SRR5383785	10298	illumina	v4	515F 806R
SRR5383786	85	human	adult	Shuar	rural	56	female	Stagaman2016	13	SRR5383786	24870	illumina	v4	515F 806R
SRR5383787	83	human	child	Shuar	rural	4	female	Stagaman2016	12	SRR5383787	15629	illumina	v4	515F 806R
SRR5383788	80	human	adult	Shuar	rural	22	female	Stagaman2016	13	SRR5383788	11415	illumina	v4	515F 806R
SRR5383789	79	human	adult	Shuar	rural	22	female	Stagaman2016	16	SRR5383789	11996	illumina	v4	515F 806R
SRR5383790	78	human	adolescent	Shuar	mixed	11	male	Stagaman2016	12	SRR5383790	28226	illumina	v4	515F 806R
SRR5383791	77	human	adult	Shuar	mixed	33	female	Stagaman2016	9	SRR5383791	8325	illumina	v4	515F 806R
SRR5383792	76	human	child	Shuar	mixed	5	male	Stagaman2016	11	SRR5383792	45378	illumina	v4	515F 806R
SRR5383793	75	human	child	Shuar	mixed	8	male	Stagaman2016	14	SRR5383793	6261	illumina	v4	515F 806R
SRR5383794	74	human	child	Shuar	mixed	5	female	Stagaman2016	15	SRR5383794	21783	illumina	v4	515F 806R
SRR5383795	73	human	adult	Shuar	mixed	adult	female	Stagaman2016	12	SRR5383795	25558	illumina	v4	515F 806R
SRR5383796	70	human	child	Shuar	mixed	5	female	Stagaman2016	12	SRR5383796	23890	illumina	v4	515F 806R
SRR5383797	69	human	adult	Shuar	mixed	17	male	Stagaman2016	12	SRR5383797	161032	illumina	v4	515F 806R
SRR5383798	68	human	adult	Shuar	mixed	18	female	Stagaman2016	12	SRR5383798	11064	illumina	v4	515F 806R
SRR5383799	66	human	adult	Shuar	mixed	49	female	Stagaman2016	14	SRR5383799	17351	illumina	v4	515F 806R
SRR5383800	65	human	child	Shuar	mixed	4	male	Stagaman2016	12	SRR5383800	9762	illumina	v4	515F 806R
SRR5383801	64	human	adult	Shuar	mixed	15	male	Stagaman2016	12	SRR5383801	41092	illumina	v4	515F 806R
SRR5383802	63	human	child	Shuar	mixed	5	female	Stagaman2016	12	SRR5383802	6893	illumina	v4	515F 806R
SRR5383803	62	human	adult	Shuar	mixed	38	male	Stagaman2016	12	SRR5383803	13207	illumina	v4	515F 806R
SRR5383804	61	human	adult	Shuar	mixed	20	male	Stagaman2016	3	SRR5383804	8171	illumina	v4	515F 806R
SRR5383805	60	human	child	Shuar	mixed	5	male	Stagaman2016	10	SRR5383805	7188	illumina	v4	515F 806R
SRR5383806	59	human	adult	Shuar	mixed	46	female	Stagaman2016	12	SRR5383806	56468	illumina	v4	515F 806R
SRR5383807	58	human	adult	Shuar	mixed	40	male	Stagaman2016	10	SRR5383807	28129	illumina	v4	515F 806R
SRR5383808	57	human	adolescent	Shuar	mixed	14	female	Stagaman2016	11	SRR5383808	9833	illumina	v4	515F 806R
SRR5383809	56	human	child	Shuar	mixed	8	male	Stagaman2016	12	SRR5383809	10338	illumina	v4	515F 806R
SRR5383810	55	human	adult	Shuar	mixed	42	female	Stagaman2016	15	SRR5383810	28343	illumina	v4	515F 806R
SRR5383811	54	human	adolescent	Shuar	mixed	11	female	Stagaman2016	12	SRR5383811	6672	illumina	v4	515F 806R
SRR5383812	53	human	child	Shuar	mixed	8	female	Stagaman2016	10	SRR5383812	31230	illumina	v4	515F 806R
SRR5383813	52	human	adolescent	Shuar	mixed	11	female	Stagaman2016	12	SRR5383813	14835	illumina	v4	515F 806R
SRR5383814	50	human	adolescent	Shuar	mixed	12	male	Stagaman2016	10	SRR5383814	15778	illumina	v4	515F 806R
SRR5383815	49	human	child	Shuar	mixed	9	male	Stagaman2016	12	SRR5383815	9012	illumina	v4	515F 806R
SRR5383816	48	human	adult	Shuar	mixed	50	male	Stagaman2016	13	SRR5383816	11808	illumina	v4	515F 806R
SRR5383817	47	human	child	Shuar	mixed	7	male	Stagaman2016	12	SRR5383817	20431	illumina	v4	515F 806R
SRR5383818	46	human	adolescent	Shuar	mixed	12	female	Stagaman2016	12	SRR5383818	26725	illumina	v4	515F 806R
SRR5383819	45	human	child	Shuar	mixed	10	male	Stagaman2016	12	SRR5383819	20171	illumina	v4	515F 806R
SRR5383820	44	human	adolescent	Shuar	mixed	13	female	Stagaman2016	12	SRR5383820	19076	illumina	v4	515F 806R
SRR5383821	42	human	child	Shuar	mixed	6	female	Stagaman2016	12	SRR5383821	14334	illumina	v4	515F 806R
SRR5383822	41	human	adult	Shuar	mixed	15	male	Stagaman2016	10	SRR5383822	4619	illumina	v4	515F 806R
SRR5383823	40	human	adult	Shuar	mixed	37	female	Stagaman2016	12	SRR5383823	33912	illumina	v4	515F 806R
SRR5383824	39	human	child	Shuar	mixed	8	male	Stagaman2016	10	SRR5383824	20333	illumina	v4	515F 806R
SRR5383825	38	human	adult	Shuar	mixed	43	female	Stagaman2016	16	SRR5383825	12948	illumina	v4	515F 806R
SRR5383826	37	human	child	Shuar	mixed	5	male	Stagaman2016	9	SRR5383826	13970	illumina	v4	515F 806R
SRR5383827	36	human	child	Shuar	mixed	7	male	Stagaman2016	12	SRR5383827	63537	illumina	v4	515F 806R
SRR5383828	35	human	adolescent	Shuar	mixed	12	female	Stagaman2016	12	SRR5383828	70399	illumina	v4	515F 806R
SRR5383829	34	human	child	Shuar	mixed	6	male	Stagaman2016	12	SRR5383829	12672	illumina	v4	515F 806R
SRR5383830	33	human	adolescent	Shuar	mixed	12	male	Stagaman2016	12	SRR5383830	12858	illumina	v4	515F 806R
SRR5383831	32	human	child	Shuar	mixed	9	male	Stagaman2016	12	SRR5383831	6775	illumina	v4	515F 806R
SRR5383832	31	human	adult	Shuar	mixed	52	female	Stagaman2016	13	SRR5383832	14493	illumina	v4	515F 806R
SRR5383833	30	human	adolescent	Shuar	mixed	14	male	Stagaman2016	10	SRR5383833	36536	illumina	v4	515F 806R
SRR5383834	29	human	adult	Shuar	mixed	48	male	Stagaman2016	12	SRR5383834	11436	illumina	v4	515F 806R
SRR5383835	28	human	adult	Shuar	mixed	17	female	Stagaman2016	18	SRR5383835	7774	illumina	v4	515F 806R
SRR5383836	27	human	child	Shuar	mixed	3	male	Stagaman2016	11	SRR5383836	5910	illumina	v4	515F 806R
SRR5383837	25	human	adult	Shuar	mixed	52	female	Stagaman2016	6	SRR5383837	4453	illumina	v4	515F 806R
SRR5383838	24	human	adult	Shuar	mixed	36	female	Stagaman2016	10	SRR5383838	22997	illumina	v4	515F 806R
SRR5383839	23	human	adult	Shuar	mixed	38	male	Stagaman2016	11	SRR5383839	13935	illumina	v4	515F 806R
SRR5383840	22	human	child	Shuar	mixed	5	male	Stagaman2016	10	SRR5383840	3710	illumina	v4	515F 806R
SRR5383841	20	human	adult	Shuar	mixed	22	female	Stagaman2016	10	SRR5383841	6625	illumina	v4	515F 806R
SRR5383842	19	human	adult	Shuar	mixed	19	female	Stagaman2016	3	SRR5383842	11058	illumina	v4	515F 806R
SRR5383843	18	human	child	Shuar	mixed	9	male	Stagaman2016	14	SRR5383843	10635	illumina	v4	515F 806R
SRR5383844	17	human	adult	Shuar	mixed	15	female	Stagaman2016	11	SRR5383844	16141	illumina	v4	515F 806R
SRR5383845	16	human	adolescent	Shuar	mixed	12	male	Stagaman2016	15	SRR5383845	21934	illumina	v4	515F 806R
SRR5383846	14	human	adult	Shuar	mixed	15	female	Stagaman2016	15	SRR5383846	8070	illumina	v4	515F 806R
SRR5383847	13	human	child	Shuar	mixed	10	female	Stagaman2016	11	SRR5383847	27181	illumina	v4	515F 806R
SRR5383848	12	human	child	Shuar	mixed	10	male	Stagaman2016	12	SRR5383848	14355	illumina	v4	515F 806R
SRR5383849	11	human	adult	Shuar	mixed	16	female	Stagaman2016	11	SRR5383849	2104	illumina	v4	515F 806R
SRR5383850	10	human	adolescent	Shuar	mixed	13	male	Stagaman2016	11	SRR5383850	33803	illumina	v4	515F 806R
SRR5383851	9	human	adult	Shuar	mixed	37	female	Stagaman2016	12	SRR5383851	12599	illumina	v4	515F 806R
SRR5383852	8	human	adult	Shuar	mixed	52	male	Stagaman2016	14	SRR5383852	5868	illumina	v4	515F 806R
SRR5383853	7	human	adult	Shuar	mixed	19	female	Stagaman2016	15	SRR5383853	7235	illumina	v4	515F 806R
SRR5383854	6	human	adult	Shuar	mixed	32	female	Stagaman2016	11	SRR5383854	3936	illumina	v4	515F 806R
SRR5383855	5	human	child	Shuar	mixed	10	male	Stagaman2016	15	SRR5383855	5795	illumina	v4	515F 806R
SRR5383856	4	human	adult	Shuar	mixed	56	male	Stagaman2016	12	SRR5383856	12977	illumina	v4	515F 806R
SRR5383857	3	human	adolescent	Shuar	mixed	12	female	Stagaman2016	14	SRR5383857	5448	illumina	v4	515F 806R
SRR5383858	2	human	child	Shuar	mixed	5	female	Stagaman2016	16	SRR5383858	15820	illumina	v4	515F 806R
SRR5383859	1	human	adult	Shuar	mixed	43	female	Stagaman2016	18	SRR5383859	97012	illumina	v4	515F 806R
SRR5383860	298	human	adult	Shuar	mixed	47	female	Stagaman2016	5	SRR5383860	4329	illumina	v4	515F 806R
SRR5383861	82	human	child	Shuar	rural	6	male	Stagaman2016	17	SRR5383861	6999	illumina	v4	515F 806R
SRR5383862	51	human	adult	Shuar	mixed	18	female	Stagaman2016	18	SRR5383862	4063	illumina	v4	515F 806R
SRR5383863	184	human	adult	Shuar	rural	48	male	Stagaman2016	15	SRR5383863	3175	illumina	v4	515F 806R
SRR5383864	162	human	adult	Shuar	rural	18	female	Stagaman2016	9	SRR5383864	23701	illumina	v4	515F 806R
SRR5383865	128	human	adolescent	Shuar	mixed	14	male	Stagaman2016	7	SRR5383865	3230	illumina	v4	515F 806R
SRR5383866	297	human	adult	Shuar	mixed	18	female	Stagaman2016	7	SRR5383866	19429	illumina	v4	515F 806R
SRR5383867	26	human	child	Shuar	mixed	8	female	Stagaman2016	11	SRR5383867	11420	illumina	v4	515F 806R
tno1	NA	human	adult	Dutch	urban	na	na	TIM	NA	NA	12669	illumina	v4	515F 806R
tno2	NA	human	adult	Dutch	urban	na	na	TIM	NA	NA	12106	illumina	v4	515F 806R
SRR6378168	AUS55	termite	adult	termite	organic	na	na	Bourguignon2018	Mastotermitidae	SRR6378168	15020	illumina	v3v4	343Fmod 784Rmod
SRR6378173	AUST14-12	termite	adult	termite	wood	na	na	Bourguignon2018	Stolotermitidae	SRR6378173	4371	illumina	v3v4	343Fmod 784Rmod
SRR6378179	PORO-CHILI	termite	adult	termite	wood	na	na	Bourguignon2018	Stolotermitidae	SRR6378179	16924	illumina	v3v4	343Fmod 784Rmod
SRR6378165	AUS89	termite	adult	termite	wood	na	na	Bourguignon2018	Kalotermitidae	SRR6378165	22299	illumina	v3v4	343Fmod 784Rmod
SRR6378189	G678-2	termite	adult	termite	wood	na	na	Bourguignon2018	Kalotermitidae	SRR6378189	8142	illumina	v3v4	343Fmod 784Rmod
SRR6378177	RDCT163	termite	adult	termite	wood	na	na	Bourguignon2018	Kalotermitidae	SRR6378177	19103	illumina	v3v4	343Fmod 784Rmod
SRR6378250	SING35	termite	adult	termite	wood	na	na	Bourguignon2018	Kalotermitidae	SRR6378250	16036	illumina	v3v4	343Fmod 784Rmod
SRR6378225	THAI31	termite	adult	termite	wood	na	na	Bourguignon2018	Kalotermitidae	SRR6378225	10041	illumina	v3v4	343Fmod 784Rmod
SRR6378195	G13-107	termite	adult	termite	wood	na	na	Bourguignon2018	Rhinotermitidae	SRR6378195	18838	illumina	v3v4	343Fmod 784Rmod
SRR6378205	G13-26	termite	adult	termite	wood	na	na	Bourguignon2018	Rhinotermitidae	SRR6378205	10586	illumina	v3v4	343Fmod 784Rmod
SRR6378212	G13-54	termite	adult	termite	wood	na	na	Bourguignon2018	Rhinotermitidae	SRR6378212	11323	illumina	v3v4	343Fmod 784Rmod
SRR6378192	NG77	termite	adult	termite	wood	na	na	Bourguignon2018	Rhinotermitidae	SRR6378192	11290	illumina	v3v4	343Fmod 784Rmod
SRR6378178	NG90	termite	adult	termite	wood	na	na	Bourguignon2018	Rhinotermitidae	SRR6378178	13639	illumina	v3v4	343Fmod 784Rmod
SRR6378174	RDCT112	termite	adult	termite	wood	na	na	Bourguignon2018	Rhinotermitidae	SRR6378174	5566	illumina	v3v4	343Fmod 784Rmod
SRR6378237	THAI23	termite	adult	termite	wood	na	na	Bourguignon2018	Rhinotermitidae	SRR6378237	6006	illumina	v3v4	343Fmod 784Rmod
SRR6378224	THAI98	termite	adult	termite	wood	na	na	Bourguignon2018	Rhinotermitidae	SRR6378224	6955	illumina	v3v4	343Fmod 784Rmod
SRR6378222	BRA31	termite	adult	termite	humus	na	na	Bourguignon2018	Serritermitidae	SRR6378222	3431	illumina	v3v4	343Fmod 784Rmod
SRR6378206	G13-144	termite	adult	termite	humus	na	na	Bourguignon2018	Serritermitidae	SRR6378206	8636	illumina	v3v4	343Fmod 784Rmod
SRR6378241	BDIT086	termite	adult	termite	fungus	na	na	Bourguignon2018	Macrotermitinae	SRR6378241	19368	illumina	v3v4	343Fmod 784Rmod
SRR6378239	BDIT23	termite	adult	termite	fungus	na	na	Bourguignon2018	Macrotermitinae	SRR6378239	8208	illumina	v3v4	343Fmod 784Rmod
SRR6378214	BDIT8-M2B	termite	adult	termite	fungus	na	na	Bourguignon2018	Macrotermitinae	SRR6378214	19739	illumina	v3v4	343Fmod 784Rmod
SRR6378193	MAL43	termite	adult	termite	fungus	na	na	Bourguignon2018	Macrotermitinae	SRR6378193	12669	illumina	v3v4	343Fmod 784Rmod
SRR6378180	RDCT016	termite	adult	termite	fungus	na	na	Bourguignon2018	Macrotermitinae	SRR6378180	7549	illumina	v3v4	343Fmod 784Rmod
SRR6378231	THAI047	termite	adult	termite	fungus	na	na	Bourguignon2018	Macrotermitinae	SRR6378231	12949	illumina	v3v4	343Fmod 784Rmod
SRR6378229	THAI064	termite	adult	termite	fungus	na	na	Bourguignon2018	Macrotermitinae	SRR6378229	16391	illumina	v3v4	343Fmod 784Rmod
SRR6378243	BDIT108	termite	adult	termite	humus	na	na	Bourguignon2018	Foraminitermitinae	SRR6378243	4680	illumina	v3v4	343Fmod 784Rmod
SRR6378234	TBRU8.14E	termite	adult	termite	humus	na	na	Bourguignon2018	Foraminitermitinae	SRR6378234	11574	illumina	v3v4	343Fmod 784Rmod
SRR6378182	RDCT165	termite	adult	termite	humus	na	na	Bourguignon2018	Sphaerotermitinae	SRR6378182	19736	illumina	v3v4	343Fmod 784Rmod
SRR6378245	BDIT062	termite	adult	termite	soil	na	na	Bourguignon2018	Apicotermitinae	SRR6378245	8967	illumina	v3v4	343Fmod 784Rmod
SRR6378247	BDIT076	termite	adult	termite	soil	na	na	Bourguignon2018	Apicotermitinae	SRR6378247	9411	illumina	v3v4	343Fmod 784Rmod
SRR6378197	FG-ND2-26	termite	adult	termite	soil	na	na	Bourguignon2018	Apicotermitinae	SRR6378197	15045	illumina	v3v4	343Fmod 784Rmod
SRR6378196	FG-ND2-48	termite	adult	termite	soil	na	na	Bourguignon2018	Apicotermitinae	SRR6378196	7292	illumina	v3v4	343Fmod 784Rmod
SRR6378194	G13-120	termite	adult	termite	soil	na	na	Bourguignon2018	Apicotermitinae	SRR6378194	17803	illumina	v3v4	343Fmod 784Rmod
SRR6378210	G13-34	termite	adult	termite	soil	na	na	Bourguignon2018	Apicotermitinae	SRR6378210	14692	illumina	v3v4	343Fmod 784Rmod
SRR6378186	G13-66	termite	adult	termite	soil	na	na	Bourguignon2018	Apicotermitinae	SRR6378186	9094	illumina	v3v4	343Fmod 784Rmod
SRR6378181	RDCT098	termite	adult	termite	soil	na	na	Bourguignon2018	Apicotermitinae	SRR6378181	16261	illumina	v3v4	343Fmod 784Rmod
SRR6378171	3-21-1	termite	adult	termite	humus	na	na	Bourguignon2018	Termitinae	SRR6378171	7176	illumina	v3v4	343Fmod 784Rmod
SRR6378170	AUS4	termite	adult	termite	humus	na	na	Bourguignon2018	Termitinae	SRR6378170	9678	illumina	v3v4	343Fmod 784Rmod
SRR6378166	AUS66	termite	adult	termite	humus	na	na	Bourguignon2018	Termitinae	SRR6378166	7084	illumina	v3v4	343Fmod 784Rmod
SRR6378172	BDIT026	termite	adult	termite	humus	na	na	Bourguignon2018	Termitinae	SRR6378172	13784	illumina	v3v4	343Fmod 784Rmod
SRR6378240	BDIT102	termite	adult	termite	humus	na	na	Bourguignon2018	Termitinae	SRR6378240	11217	illumina	v3v4	343Fmod 784Rmod
SRR6378218	BRA2	termite	adult	termite	humus	na	na	Bourguignon2018	Termitinae	SRR6378218	8677	illumina	v3v4	343Fmod 784Rmod
SRR6378202	G13-140	termite	adult	termite	humus	na	na	Bourguignon2018	Termitinae	SRR6378202	12143	illumina	v3v4	343Fmod 784Rmod
SRR6378207	G13-16	termite	adult	termite	humus	na	na	Bourguignon2018	Termitinae	SRR6378207	12317	illumina	v3v4	343Fmod 784Rmod
SRR6378211	G13-44	termite	adult	termite	humus	na	na	Bourguignon2018	Termitinae	SRR6378211	14095	illumina	v3v4	343Fmod 784Rmod
SRR6378208	G13-49	termite	adult	termite	humus	na	na	Bourguignon2018	Termitinae	SRR6378208	12888	illumina	v3v4	343Fmod 784Rmod
SRR6378213	G13-55	termite	adult	termite	humus	na	na	Bourguignon2018	Termitinae	SRR6378213	14321	illumina	v3v4	343Fmod 784Rmod
SRR6378185	G13-58	termite	adult	termite	humus	na	na	Bourguignon2018	Termitinae	SRR6378185	10580	illumina	v3v4	343Fmod 784Rmod
SRR6378188	G697	termite	adult	termite	humus	na	na	Bourguignon2018	Termitinae	SRR6378188	10377	illumina	v3v4	343Fmod 784Rmod
SRR6378190	G730	termite	adult	termite	humus	na	na	Bourguignon2018	Termitinae	SRR6378190	14498	illumina	v3v4	343Fmod 784Rmod
SRR6378175	RDCT125	termite	adult	termite	humus	na	na	Bourguignon2018	Termitinae	SRR6378175	3269	illumina	v3v4	343Fmod 784Rmod
SRR6378183	RDCT180	termite	adult	termite	humus	na	na	Bourguignon2018	Termitinae	SRR6378183	16785	illumina	v3v4	343Fmod 784Rmod
SRR6378253	RDCT63	termite	adult	termite	humus	na	na	Bourguignon2018	Termitinae	SRR6378253	17530	illumina	v3v4	343Fmod 784Rmod
SRR6378251	SAF8	termite	adult	termite	humus	na	na	Bourguignon2018	Termitinae	SRR6378251	12166	illumina	v3v4	343Fmod 784Rmod
SRR6378256	SING57	termite	adult	termite	humus	na	na	Bourguignon2018	Termitinae	SRR6378256	9384	illumina	v3v4	343Fmod 784Rmod
SRR6378254	SING87	termite	adult	termite	humus	na	na	Bourguignon2018	Termitinae	SRR6378254	12703	illumina	v3v4	343Fmod 784Rmod
SRR6378249	T2.1e	termite	adult	termite	humus	na	na	Bourguignon2018	Termitinae	SRR6378249	13693	illumina	v3v4	343Fmod 784Rmod
SRR6378235	THAI024	termite	adult	termite	humus	na	na	Bourguignon2018	Termitinae	SRR6378235	14813	illumina	v3v4	343Fmod 784Rmod
SRR6378232	THAI037	termite	adult	termite	humus	na	na	Bourguignon2018	Termitinae	SRR6378232	7193	illumina	v3v4	343Fmod 784Rmod
SRR6378233	THAI038	termite	adult	termite	humus	na	na	Bourguignon2018	Termitinae	SRR6378233	13319	illumina	v3v4	343Fmod 784Rmod
SRR6378236	THAI105	termite	adult	termite	humus	na	na	Bourguignon2018	Termitinae	SRR6378236	5241	illumina	v3v4	343Fmod 784Rmod
SRR6378227	TP1-19F	termite	adult	termite	humus	na	na	Bourguignon2018	Termitinae	SRR6378227	10825	illumina	v3v4	343Fmod 784Rmod
SRR6378226	TP1.19C	termite	adult	termite	humus	na	na	Bourguignon2018	Termitinae	SRR6378226	12563	illumina	v3v4	343Fmod 784Rmod
SRR6378169	AUS54	termite	adult	termite	wood	na	na	Bourguignon2018	Nasutitermitinae	SRR6378169	13203	illumina	v3v4	343Fmod 784Rmod
SRR6378167	AUS56	termite	adult	termite	wood	na	na	Bourguignon2018	Nasutitermitinae	SRR6378167	11424	illumina	v3v4	343Fmod 784Rmod
SRR6378164	AUS97	termite	adult	termite	wood	na	na	Bourguignon2018	Nasutitermitinae	SRR6378164	12632	illumina	v3v4	343Fmod 784Rmod
SRR6378242	BDIT114	termite	adult	termite	wood	na	na	Bourguignon2018	Nasutitermitinae	SRR6378242	13989	illumina	v3v4	343Fmod 784Rmod
SRR6378215	BRA1	termite	adult	termite	wood	na	na	Bourguignon2018	Nasutitermitinae	SRR6378215	15437	illumina	v3v4	343Fmod 784Rmod
SRR6378219	BRA20	termite	adult	termite	wood	na	na	Bourguignon2018	Nasutitermitinae	SRR6378219	9298	illumina	v3v4	343Fmod 784Rmod
SRR6378223	BRA4	termite	adult	termite	wood	na	na	Bourguignon2018	Nasutitermitinae	SRR6378223	11538	illumina	v3v4	343Fmod 784Rmod
SRR6378200	BRA6	termite	adult	termite	wood	na	na	Bourguignon2018	Nasutitermitinae	SRR6378200	6608	illumina	v3v4	343Fmod 784Rmod
SRR6378198	COL2012T08	termite	adult	termite	wood	na	na	Bourguignon2018	Nasutitermitinae	SRR6378198	7632	illumina	v3v4	343Fmod 784Rmod
SRR6378203	G13-127	termite	adult	termite	wood	na	na	Bourguignon2018	Nasutitermitinae	SRR6378203	8961	illumina	v3v4	343Fmod 784Rmod
SRR6378209	G13-53	termite	adult	termite	wood	na	na	Bourguignon2018	Nasutitermitinae	SRR6378209	4777	illumina	v3v4	343Fmod 784Rmod
SRR6378187	G13-64	termite	adult	termite	wood	na	na	Bourguignon2018	Nasutitermitinae	SRR6378187	19359	illumina	v3v4	343Fmod 784Rmod
SRR6378191	G700	termite	adult	termite	wood	na	na	Bourguignon2018	Nasutitermitinae	SRR6378191	9119	illumina	v3v4	343Fmod 784Rmod
SRR6378252	RDCT94	termite	adult	termite	wood	na	na	Bourguignon2018	Nasutitermitinae	SRR6378252	16568	illumina	v3v4	343Fmod 784Rmod
SRR6378257	SING55	termite	adult	termite	wood	na	na	Bourguignon2018	Nasutitermitinae	SRR6378257	11241	illumina	v3v4	343Fmod 784Rmod
SRR6378255	SING78	termite	adult	termite	wood	na	na	Bourguignon2018	Nasutitermitinae	SRR6378255	10627	illumina	v3v4	343Fmod 784Rmod
SRR6378248	T3-10G	termite	adult	termite	wood	na	na	Bourguignon2018	Nasutitermitinae	SRR6378248	19347	illumina	v3v4	343Fmod 784Rmod
SRR6378230	THAI045	termite	adult	termite	wood	na	na	Bourguignon2018	Nasutitermitinae	SRR6378230	16604	illumina	v3v4	343Fmod 784Rmod
SRR6378228	THAI052	termite	adult	termite	wood	na	na	Bourguignon2018	Nasutitermitinae	SRR6378228	9739	illumina	v3v4	343Fmod 784Rmod
SRR6378244	BDIT069	termite	adult	termite	soil	na	na	Bourguignon2018	Cubitermitinae	SRR6378244	14804	illumina	v3v4	343Fmod 784Rmod
SRR6378246	BDIT080	termite	adult	termite	soil	na	na	Bourguignon2018	Cubitermitinae	SRR6378246	13819	illumina	v3v4	343Fmod 784Rmod
SRR6378238	BDIT43	termite	adult	termite	soil	na	na	Bourguignon2018	Cubitermitinae	SRR6378238	14283	illumina	v3v4	343Fmod 784Rmod
SRR6378176	RDCT159	termite	adult	termite	soil	na	na	Bourguignon2018	Cubitermitinae	SRR6378176	12516	illumina	v3v4	343Fmod 784Rmod
SRR6378216	BRA11-2	termite	adult	termite	humus	na	na	Bourguignon2018	Syntermitinae	SRR6378216	7043	illumina	v3v4	343Fmod 784Rmod
SRR6378217	BRA14	termite	adult	termite	humus	na	na	Bourguignon2018	Syntermitinae	SRR6378217	11828	illumina	v3v4	343Fmod 784Rmod
SRR6378220	BRA29	termite	adult	termite	humus	na	na	Bourguignon2018	Syntermitinae	SRR6378220	10132	illumina	v3v4	343Fmod 784Rmod
SRR6378221	BRA3	termite	adult	termite	humus	na	na	Bourguignon2018	Syntermitinae	SRR6378221	10235	illumina	v3v4	343Fmod 784Rmod
SRR6378201	BRA5	termite	adult	termite	humus	na	na	Bourguignon2018	Syntermitinae	SRR6378201	13966	illumina	v3v4	343Fmod 784Rmod
SRR6378199	BRA9	termite	adult	termite	humus	na	na	Bourguignon2018	Syntermitinae	SRR6378199	16818	illumina	v3v4	343Fmod 784Rmod
SRR6378204	G13-23	termite	adult	termite	humus	na	na	Bourguignon2018	Syntermitinae	SRR6378204	13689	illumina	v3v4	343Fmod 784Rmod
SRR6378184	G13-62	termite	adult	termite	humus	na	na	Bourguignon2018	Syntermitinae	SRR6378184	14781	illumina	v3v4	343Fmod 784Rmod
SRR3473168	Bulbitermes_foregut	termite	adult	termite	wood	na	na	Chew2018	Nasutitermitinae	SRR3473168	1527270	illumina	v3v4	S-D-Bact-0341-b-S-17F S-D-Bact-0785-a-A-21R
SRR3473169	Bulbitermes_midgut	termite	adult	termite	wood	na	na	Chew2018	Nasutitermitinae	SRR3473169	2183313	illumina	v3v4	S-D-Bact-0341-b-S-17F S-D-Bact-0785-a-A-21R
SRR3473170	Bulbitermes_hindgut	termite	adult	termite	wood	na	na	Chew2018	Nasutitermitinae	SRR3473170	3723356	illumina	v3v4	S-D-Bact-0341-b-S-17F S-D-Bact-0785-a-A-21R
SRR1027410	Ergaula.capucina	cockroach	adult	cockroach	omni	na	na	Dietrich2014	Cockroach	SRR1027410	3496	454	v3v4	343Fmod 784Rmod
SRR1027411	Symploce.macroptera	cockroach	adult	cockroach	omni	na	na	Dietrich2014	Cockroach	SRR1027411	2740	454	v3v4	343Fmod 784Rmod
SRR1027412	Rhyparobia.maderae	cockroach	adult	cockroach	omni	na	na	Dietrich2014	Cockroach	SRR1027412	7639	454	v3v4	343Fmod 784Rmod
SRR1027413	Elliptorhina.chopardi	cockroach	adult	cockroach	omni	na	na	Dietrich2014	Cockroach	SRR1027413	4035	454	v3v4	343Fmod 784Rmod
SRR1027414	Panchlora.sp	cockroach	adult	cockroach	omni	na	na	Dietrich2014	Cockroach	SRR1027414	2648	454	v3v4	343Fmod 784Rmod
SRR1027415	Diploptera.punctata	cockroach	adult	cockroach	omni	na	na	Dietrich2014	Cockroach	SRR1027415	3249	454	v3v4	343Fmod 784Rmod
SRR1027416	Opisthoplatia.orientalis	cockroach	adult	cockroach	omni	na	na	Dietrich2014	Cockroach	SRR1027416	7742	454	v3v4	343Fmod 784Rmod
SRR1027417	Panesthia.angustipennis	cockroach	adult	cockroach	omni	na	na	Dietrich2014	Cockroach	SRR1027417	2016	454	v3v4	343Fmod 784Rmod
SRR1027418	Salganea.esakii	cockroach	adult	cockroach	omni	na	na	Dietrich2014	Cockroach	SRR1027418	10553	454	v3v4	343Fmod 784Rmod
SRR1027419	Eublaberus.posticus	cockroach	adult	cockroach	omni	na	na	Dietrich2014	Cockroach	SRR1027419	64031	454	v3v4	343Fmod 784Rmod
SRR1027420	Schultesia.lampyridiformis	cockroach	adult	cockroach	omni	na	na	Dietrich2014	Cockroach	SRR1027420	3137	454	v3v4	343Fmod 784Rmod
SRR1027421	Eurycotis.floridana	cockroach	adult	cockroach	omni	na	na	Dietrich2014	Cockroach	SRR1027421	33418	454	v3v4	343Fmod 784Rmod
SRR1027422	Shelfordella.lateralis	cockroach	adult	cockroach	omni	na	na	Dietrich2014	Cockroach	SRR1027422	3685	454	v3v4	343Fmod 784Rmod
SRR1027423	Blatta.orientalis	cockroach	adult	cockroach	omni	na	na	Dietrich2014	Cockroach	SRR1027423	4956	454	v3v4	343Fmod 784Rmod
SRR1027424	Cryptocercus.punctulatus	cockroach	adult	cockroach	omni	na	na	Dietrich2014	Cockroach	SRR1027424	6814	454	v3v4	343Fmod 784Rmod
SRR1027425	Mastotermes.darwiniensis	termite	adult	termite	organic	na	na	Dietrich2014	Mastotermitidae	SRR1027425	3461	454	v3v4	343Fmod 784Rmod
SRR1027426	Zootermopsis.nevadensis	termite	adult	termite	wood	na	na	Dietrich2014	Termopsidae	SRR1027426	9822	454	v3v4	343Fmod 784Rmod
SRR1027427	Hodotermopsis.sjoestedti	termite	adult	termite	wood	na	na	Dietrich2014	Termopsidae	SRR1027427	9468	454	v3v4	343Fmod 784Rmod
SRR1027428	Hodotermes.mossambicus	termite	adult	termite	wood	na	na	Dietrich2014	Termopsidae	SRR1027428	2218	454	v3v4	343Fmod 784Rmod
SRR1027429	Incisitermes.marginipennis	termite	adult	termite	wood	na	na	Dietrich2014	Kalotermitidae	SRR1027429	23687	454	v3v4	343Fmod 784Rmod
SRR1027430	Neotermes.jouteli	termite	adult	termite	wood	na	na	Dietrich2014	Kalotermitidae	SRR1027430	32297	454	v3v4	343Fmod 784Rmod
SRR1027431	Reticulitermes.santonensis	termite	adult	termite	wood	na	na	Dietrich2014	Rhinotermitidae	SRR1027431	4249	454	v3v4	343Fmod 784Rmod
SRR1027432	Coptotermes.niger	termite	adult	termite	wood	na	na	Dietrich2014	Rhinotermitidae	SRR1027432	3747	454	v3v4	343Fmod 784Rmod
SRR1027433	Odontotermes.sp	termite	adult	termite	fungus	na	na	Dietrich2014	Odontotermes	SRR1027433	4347	454	v3v4	343Fmod 784Rmod
SRR1027434	Macrotermes.sp	termite	adult	termite	fungus	na	na	Dietrich2014	Macrotermes	SRR1027434	7140	454	v3v4	343Fmod 784Rmod
SRR1027435	Macrotermes.subhyalinus	termite	adult	termite	fungus	na	na	Dietrich2014	Macrotermes	SRR1027435	1388	454	v3v4	343Fmod 784Rmod
SRR1027436	Alyscotermes.trestus	termite	adult	termite	soil	na	na	Dietrich2014	Apicotermitinae	SRR1027436	13994	454	v3v4	343Fmod 784Rmod
SRR1027437	Cubitermes.ugandensis	termite	adult	termite	soil	na	na	Dietrich2014	Cubitermitinae	SRR1027437	1127	454	v3v4	343Fmod 784Rmod
SRR1027438	Ophiotermes.sp	termite	adult	termite	humus	na	na	Dietrich2014	Termitinae	SRR1027438	3003	454	v3v4	343Fmod 784Rmod
SRR1027439	Amitermes.meridionalis	termite	adult	termite	grass	na	na	Dietrich2014	Amitermitinae	SRR1027439	9585	454	v3v4	343Fmod 784Rmod
SRR1027440	Microcerotermes.sp	termite	adult	termite	wood	na	na	Dietrich2014	Termitidae	SRR1027440	29020	454	v3v4	343Fmod 784Rmod
SRR1027441	Nasutitermes.corniger	termite	adult	termite	wood	na	na	Dietrich2014	Nasutitermes	SRR1027441	2180	454	v3v4	343Fmod 784Rmod
SRR1027442	Nasutitermes.takasagoensis	termite	adult	termite	wood	na	na	Dietrich2014	Nasutitermes	SRR1027442	8164	454	v3v4	343Fmod 784Rmod
SRR1027443	Trinervitermes.sp	termite	adult	termite	grass	na	na	Dietrich2014	Termitidae	SRR1027443	10685	454	v3v4	343Fmod 784Rmod
SRR1027444	Pachnoda.ephippiata	beetle	adult	beetle	omni	na	na	Dietrich2014	Cetoniinae	SRR1027444	5400	454	v3v4	343Fmod 784Rmod
SRR1027445	Acheta.domesticus	cricket	adult	cricket	herbivore	na	na	Dietrich2014	cricket_house	SRR1027445	2424	454	v3v4	343Fmod 784Rmod
SRR1027446	Gryllus.assimilis	cricket	adult	cricket	herbivore	na	na	Dietrich2014	cricket_field	SRR1027446	13744	454	v3v4	343Fmod 784Rmod
SRR1979119	gut_NW_Lumen	termite	adult	termite	fungus	na	na	Li2016	Odontotermes	SRR1979119	27608	454	v3v4	343Fmod 784Rmod
SRR1979120	gut_NW_Wall	termite	adult	termite	fungus	na	na	Li2016	Odontotermes	SRR1979120	21004	454	v3v4	343Fmod 784Rmod
SRR1979121	gut_Y_Lumen	termite	adult	termite	fungus	na	na	Li2016	Odontotermes	SRR1979121	51204	454	v3v4	343Fmod 784Rmod
SRR1979122	gut_O_Lumen	termite	adult	termite	fungus	na	na	Li2016	Odontotermes	SRR1979122	32898	454	v3v4	343Fmod 784Rmod
SRR1979123	gut_Y_Wall	termite	adult	termite	fungus	na	na	Li2016	Odontotermes	SRR1979123	26393	454	v3v4	343Fmod 784Rmod
SRR1979125	gut_O_Wall	termite	adult	termite	fungus	na	na	Li2016	Odontotermes	SRR1979125	35231	454	v3v4	343Fmod 784Rmod
SRR1979129	aged_comb	fungal_comb	adult	comb	fungus	na	na	Li2016	Odontotermes	SRR1979129	33813	454	v3v4	343Fmod 784Rmod
SRR1979130	fresh_comb	fungal_comb	adult	comb	fungus	na	na	Li2016	Odontotermes	SRR1979130	33699	454	v3v4	343Fmod 784Rmod
SRR1044951	fiber-frac_percoll	termite	adult	termite	wood	na	na	Kohler2012	Nasutitermes.corniger	SRR1044951	6863	454	v3v4	341Fmod 787Rmod
SRR1044952	fiber-frac_percoll	termite	adult	termite	wood	na	na	Kohler2012	Nasutitermes.corniger	SRR1044952	9210	454	v3v4	341Fmod 787Rmod
SRR1044953	fiber-frac_percoll	termite	adult	termite	wood	na	na	Kohler2012	Nasutitermes.corniger	SRR1044953	8474	454	v3v4	341Fmod 787Rmod
SRR1044954	luminal-fluid_P3	termite	adult	termite	wood	na	na	Kohler2012	Nasutitermes.corniger	SRR1044954	2955	454	v3v4	341Fmod 787Rmod
SRR1044955	luminal-fluid_P3	termite	adult	termite	wood	na	na	Kohler2012	Nasutitermes.corniger	SRR1044955	993	454	v3v4	341Fmod 787Rmod
SRR1044956	luminal-fluid_P3	termite	adult	termite	wood	na	na	Kohler2012	Nasutitermes.corniger	SRR1044956	537	454	v3v4	341Fmod 787Rmod
SRR1044957	fiber-free-frac_percoll	termite	adult	termite	wood	na	na	Kohler2012	Nasutitermes.takasagoensis	SRR1044957	6149	454	v3v4	341Fmod 787Rmod
SRR1044958	fiber-free-frac_percoll	termite	adult	termite	wood	na	na	Kohler2012	Nasutitermes.takasagoensis	SRR1044958	5432	454	v3v4	341Fmod 787Rmod
SRR1044959	fiber-free-frac_percoll	termite	adult	termite	wood	na	na	Kohler2012	Nasutitermes.takasagoensis	SRR1044959	4034	454	v3v4	341Fmod 787Rmod
SRR1044960	fiber-frac_percoll	termite	adult	termite	wood	na	na	Kohler2012	Nasutitermes.takasagoensis	SRR1044960	3161	454	v3v4	341Fmod 787Rmod
SRR1044961	fiber-frac_percoll	termite	adult	termite	wood	na	na	Kohler2012	Nasutitermes.takasagoensis	SRR1044961	1351	454	v3v4	341Fmod 787Rmod
SRR1044962	fiber-frac_percoll	termite	adult	termite	wood	na	na	Kohler2012	Nasutitermes.takasagoensis	SRR1044962	7006	454	v3v4	341Fmod 787Rmod
SRR1044963	luminal-fluid_P3	termite	adult	termite	wood	na	na	Kohler2012	Nasutitermes.takasagoensis	SRR1044963	2855	454	v3v4	341Fmod 787Rmod
SRR1044964	luminal-fluid_P3	termite	adult	termite	wood	na	na	Kohler2012	Nasutitermes.takasagoensis	SRR1044964	5228	454	v3v4	341Fmod 787Rmod
SRR1044965	luminal-fluid_P3	termite	adult	termite	wood	na	na	Kohler2012	Nasutitermes.takasagoensis	SRR1044965	5315	454	v3v4	341Fmod 787Rmod
SRR1044966	fiber-free-frac_percoll	termite	adult	termite	wood	na	na	Kohler2012	Nasutitermes.corniger	SRR1044966	22696	454	v3v4	341Fmod 787Rmod
SRR1044967	fiber-free-frac_percoll	termite	adult	termite	wood	na	na	Kohler2012	Nasutitermes.corniger	SRR1044967	5005	454	v3v4	341Fmod 787Rmod
SRR1044968	fiber-free-frac_percoll	termite	adult	termite	wood	na	na	Kohler2012	Nasutitermes.corniger	SRR1044968	3853	454	v3v4	341Fmod 787Rmod
SRR786636	Bac_OTG1	termite	adult	termite	fungus	na	na	Makonde2015	Odontotermes.sp	SRR786636	1370	454	v3v5	357F 926R
SRR786639	Bac_MTG4	termite	adult	termite	fungus	na	na	Makonde2015	Macrotermes.michaelseni	SRR786639	1392	454	v3v5	357F 926R
SRR786642	Bac_MIG7	termite	adult	termite	fungus	na	na	Makonde2015	Microtermes.sp	SRR786642	1434	454	v3v5	357F 926R
SRR786643	Bac_MCG8	termite	adult	termite	wood	na	na	Makonde2015	Microcerotermes.sp	SRR786643	1200	454	v3v5	357F 926R
SRR786644	Fung_OTG1	termite	adult	termite	fungus	na	na	Makonde2015	Odontotermes.sp	SRR786644	766	454	v3v5	357F 926R
SRR786647	Fung_MTG4	termite	adult	termite	fungus	na	na	Makonde2015	Macrotermes.michaelseni	SRR786647	894	454	v3v5	357F 926R
SRR786649	Fung_MIG7	termite	adult	termite	fungus	na	na	Makonde2015	Microtermes.sp	SRR786649	1289	454	v3v5	357F 926R
X6A1	V6A1	termite	adult	Venda	fungus	na	na	Venda	Macrotermes.natalensis	NA	56728	illumina	v4	515F 806R
X6A10	V6A10	termite	adult	Venda	fungus	na	na	Venda	Macrotermes.natalensis	NA	145043	illumina	v4	515F 806R
X6A2	V6A2	termite	adult	Venda	fungus	na	na	Venda	Macrotermes.natalensis	NA	219110	illumina	v4	515F 806R
X6A3	V6A3	termite	adult	Venda	fungus	na	na	Venda	Macrotermes.natalensis	NA	181927	illumina	v4	515F 806R
X6A4	V6A4	termite	adult	Venda	fungus	na	na	Venda	Macrotermes.natalensis	NA	127959	illumina	v4	515F 806R
X6A5	V6A5	termite	adult	Venda	fungus	na	na	Venda	Macrotermes.natalensis	NA	157852	illumina	v4	515F 806R
X6A6	V6A6	termite	adult	Venda	fungus	na	na	Venda	Macrotermes.natalensis	NA	66733	illumina	v4	515F 806R
X6A7	V6A7	termite	adult	Venda	fungus	na	na	Venda	Macrotermes.natalensis	NA	220888	illumina	v4	515F 806R
X6A8	V6A8	termite	adult	Venda	fungus	na	na	Venda	Macrotermes.natalensis	NA	137341	illumina	v4	515F 806R
X6A9	V6A9	termite	adult	Venda	fungus	na	na	Venda	Macrotermes.natalensis	NA	148171	illumina	v4	515F 806R
X7B1	V7B1	termite	adult	Venda	fungus	na	na	Venda	Macrotermes.falciger	NA	27823	illumina	v4	515F 806R
X7B2	V7B2	termite	adult	Venda	fungus	na	na	Venda	Macrotermes.falciger	NA	38255	illumina	v4	515F 806R
X7B3	V7B3	termite	adult	Venda	fungus	na	na	Venda	Macrotermes.falciger	NA	55362	illumina	v4	515F 806R
X7B4	V7B4	termite	adult	Venda	fungus	na	na	Venda	Macrotermes.falciger	NA	106747	illumina	v4	515F 806R
X7B5	V7B5	termite	adult	Venda	fungus	na	na	Venda	Macrotermes.falciger	NA	100455	illumina	v4	515F 806R
X7B6	V7B6	termite	adult	Venda	fungus	na	na	Venda	Macrotermes.falciger	NA	126844	illumina	v4	515F 806R
X7C1	V7C1	termite	adult	Venda	fungus	na	na	Venda	Macrotermes.falciger	NA	75674	illumina	v4	515F 806R
X7C2	V7C2	termite	adult	Venda	fungus	na	na	Venda	Macrotermes.falciger	NA	68485	illumina	v4	515F 806R
X7C3	V7C3	termite	adult	Venda	fungus	na	na	Venda	Macrotermes.falciger	NA	65944	illumina	v4	515F 806R
X7C4	V7C4	termite	adult	Venda	fungus	na	na	Venda	Macrotermes.falciger	NA	64359	illumina	v4	515F 806R
X7C5	V7C5	termite	adult	Venda	fungus	na	na	Venda	Macrotermes.falciger	NA	45902	illumina	v4	515F 806R
X8A1	V8A1	termite	adult	Venda	fungus	na	na	Venda	Macrotermes.natalensis	NA	1274	illumina	v4	515F 806R
X8A10	V8A10	termite	adult	Venda	fungus	na	na	Venda	Macrotermes.natalensis	NA	109	illumina	v4	515F 806R
X8A2	V8A2	termite	adult	Venda	fungus	na	na	Venda	Macrotermes.natalensis	NA	63619	illumina	v4	515F 806R
X8A3	V8A3	termite	adult	Venda	fungus	na	na	Venda	Macrotermes.natalensis	NA	91058	illumina	v4	515F 806R
X8A4	V8A4	termite	adult	Venda	fungus	na	na	Venda	Macrotermes.natalensis	NA	93434	illumina	v4	515F 806R
X8A5	V8A5	termite	adult	Venda	fungus	na	na	Venda	Macrotermes.natalensis	NA	97544	illumina	v4	515F 806R
X8A6	V8A6	termite	adult	Venda	fungus	na	na	Venda	Macrotermes.natalensis	NA	89556	illumina	v4	515F 806R
X8A7	V8A7	termite	adult	Venda	fungus	na	na	Venda	Macrotermes.natalensis	NA	307	illumina	v4	515F 806R
X8A8	V8A8	termite	adult	Venda	fungus	na	na	Venda	Macrotermes.natalensis	NA	25551	illumina	v4	515F 806R
X8A9	V8A9	termite	adult	Venda	fungus	na	na	Venda	Macrotermes.natalensis	NA	24787	illumina	v4	515F 806R
EXTNEG	EXTNEG	NA	adult	NA	fungus	na	na	Venda	na	NA	8	illumina	v4	515F 806R
FECPOS	FECPOS	human	adult	USA	urban	na	na	Venda	USA	NA	47276	illumina	v4	515F 806R
MJF1	V4BF1	termite	adult	Venda	fungus	na	na	Venda	Macrotermes.falciger	NA	3155	illumina	v4	515F 806R
MJF11	V4BF11	termite	adult	Venda	fungus	na	na	Venda	Macrotermes.falciger	NA	3102	illumina	v4	515F 806R
MJF2	V4BF2	termite	adult	Venda	fungus	na	na	Venda	Macrotermes.falciger	NA	17993	illumina	v4	515F 806R
MJF3	V4BF3	termite	adult	Venda	fungus	na	na	Venda	Macrotermes.falciger	NA	3967	illumina	v4	515F 806R
MJF4	V4BF4	termite	adult	Venda	fungus	na	na	Venda	Macrotermes.falciger	NA	3279	illumina	v4	515F 806R
MJF5	V4BF5	termite	adult	Venda	fungus	na	na	Venda	Macrotermes.falciger	NA	26210	illumina	v4	515F 806R
MJP1	V4BP1	termite	adult	Venda	fungus	na	na	Venda	Macrotermes.falciger	NA	27072	illumina	v4	515F 806R
MJP2	V4BP2	termite	adult	Venda	fungus	na	na	Venda	Macrotermes.falciger	NA	32299	illumina	v4	515F 806R
MJS1	V4BS1	termite	adult	Venda	fungus	na	na	Venda	Macrotermes.falciger	NA	35046	illumina	v4	515F 806R
MJS2	V4BS2	termite	adult	Venda	fungus	na	na	Venda	Macrotermes.falciger	NA	30129	illumina	v4	515F 806R
MJS3	V4BS3	termite	adult	Venda	fungus	na	na	Venda	Macrotermes.falciger	NA	14704	illumina	v4	515F 806R
MJS4	V4BS4	termite	adult	Venda	fungus	na	na	Venda	Macrotermes.falciger	NA	28997	illumina	v4	515F 806R
MJS5	V4BS5	termite	adult	Venda	fungus	na	na	Venda	Macrotermes.falciger	NA	32599	illumina	v4	515F 806R
MNF10	V4CF10	termite	adult	Venda	fungus	na	na	Venda	Macrotermes.falciger	NA	1171	illumina	v4	515F 806R
MNF21	V4CF21	termite	adult	Venda	fungus	na	na	Venda	Macrotermes.falciger	NA	4049	illumina	v4	515F 806R
MNF6	V4CF6	termite	adult	Venda	fungus	na	na	Venda	Macrotermes.falciger	NA	34138	illumina	v4	515F 806R
MNF7	V4CF7	termite	adult	Venda	fungus	na	na	Venda	Macrotermes.falciger	NA	24466	illumina	v4	515F 806R
MNF8	V4CF8	termite	adult	Venda	fungus	na	na	Venda	Macrotermes.falciger	NA	4130	illumina	v4	515F 806R
MNF9	V4CF9	termite	adult	Venda	fungus	na	na	Venda	Macrotermes.falciger	NA	480	illumina	v4	515F 806R
MNP3	V4CP3	termite	adult	Venda	fungus	na	na	Venda	Macrotermes.falciger	NA	24858	illumina	v4	515F 806R
MNP4	V4CP4	termite	adult	Venda	fungus	na	na	Venda	Macrotermes.falciger	NA	18579	illumina	v4	515F 806R
MNS10	V4CS10	termite	adult	Venda	fungus	na	na	Venda	Macrotermes.falciger	NA	3071	illumina	v4	515F 806R
MNS6	V4CS6	termite	adult	Venda	fungus	na	na	Venda	Macrotermes.falciger	NA	20353	illumina	v4	515F 806R
MNS7	V4CS7	termite	adult	Venda	fungus	na	na	Venda	Macrotermes.falciger	NA	29160	illumina	v4	515F 806R
MNS8	V4CS8	termite	adult	Venda	fungus	na	na	Venda	Macrotermes.falciger	NA	19188	illumina	v4	515F 806R
MNS9	V4CS9	termite	adult	Venda	fungus	na	na	Venda	Macrotermes.falciger	NA	20505	illumina	v4	515F 806R
PCRNEG	PCRNEG	NA	adult	NA	fungus	na	na	Venda	na	NA	20419	illumina	v4	515F 806R
PCRPOS	PCRPOS	human	adult	USA	fungus	na	na	Venda	na	NA	46303	illumina	v4	515F 806R
Term001	V1A1	termite	adult	Venda	fungus	na	na	Venda	Macrotermes.falciger	NA	43570	illumina	v4	515F 806R
Term002	V1A2	termite	adult	Venda	fungus	na	na	Venda	Macrotermes.falciger	NA	28642	illumina	v4	515F 806R
Term003	V1A3	termite	adult	Venda	fungus	na	na	Venda	Macrotermes.falciger	NA	24199	illumina	v4	515F 806R
Term004	V1A4	termite	adult	Venda	fungus	na	na	Venda	Macrotermes.falciger	NA	22641	illumina	v4	515F 806R
Term005	V1A5	termite	adult	Venda	fungus	na	na	Venda	Macrotermes.falciger	NA	9662	illumina	v4	515F 806R
Term006	V1B6	termite	adult	Venda	fungus	na	na	Venda	Macrotermes.falciger	NA	26801	illumina	v4	515F 806R
Term007	V1B7	termite	adult	Venda	fungus	na	na	Venda	Macrotermes.falciger	NA	31172	illumina	v4	515F 806R
Term008	V1B8	termite	adult	Venda	fungus	na	na	Venda	Macrotermes.falciger	NA	8778	illumina	v4	515F 806R
Term009	V1B9	termite	adult	Venda	fungus	na	na	Venda	Macrotermes.falciger	NA	8630	illumina	v4	515F 806R
Term010	V1B10	termite	adult	Venda	fungus	na	na	Venda	Macrotermes.falciger	NA	17835	illumina	v4	515F 806R
Term012	ctrl_pos	human	adult	USA	urban	NA	NA	Venda	USA	NA	53734	illumina	v4	515F 806R
ERR139014	ggs132	human	adult	USA	urban	24	female	Yatsunenko2012	Twin2	ERR139014	2191776	illumina	v4	515F 806R
ERR139015	ggs375	human	adult	USA	urban	43	female	Yatsunenko2012	Mother	ERR139015	2269513	illumina	v4	515F 806R
ERR139016	ggs124	human	adult	USA	urban	57	female	Yatsunenko2012	Mother	ERR139016	2341305	illumina	v4	515F 806R
ERR139017	ggs434	human	adult	USA	urban	16	male	Yatsunenko2012	Twin2	ERR139017	2267525	illumina	v4	515F 806R
ERR139018	ggs257	human	adult	Venezuela	rural_farming	66	female	Yatsunenko2012	unknown	ERR139018	485963	illumina	v4	515F 806R
ERR139019	ggs16	human	child	Malawi	rural_farming	2.39	female	Yatsunenko2012	Twin2	ERR139019	1819823	illumina	v4	515F 806R
ERR139020	ggs67	human	child	Malawi	rural_farming	0.93	female	Yatsunenko2012	Twin2	ERR139020	1711583	illumina	v4	515F 806R
ERR139021	ggs467	human	adult	USA	urban	48	male	Yatsunenko2012	Father	ERR139021	3313041	illumina	v4	515F 806R
ERR139022	ggs359	human	adolescent	USA	urban	13	male	Yatsunenko2012	Twin2	ERR139022	1991680	illumina	v4	515F 806R
ERR139023	ggs23	human	child	Malawi	rural_farming	2.21	female	Yatsunenko2012	Twin2	ERR139023	2415422	illumina	v4	515F 806R
ERR139024	ggs494	human	adult	USA	urban	50	female	Yatsunenko2012	Mother	ERR139024	1997591	illumina	v4	515F 806R
ERR139025	ggs326	human	adult	USA	urban	41	female	Yatsunenko2012	Mother	ERR139025	429581	illumina	v4	515F 806R
ERR139026	ggs63	human	child	Malawi	rural_farming	0.8	female	Yatsunenko2012	Twin1	ERR139026	1747659	illumina	v4	515F 806R
ERR139027	ggs475	human	adolescent	USA	urban	11	male	Yatsunenko2012	Brother1	ERR139027	2908309	illumina	v4	515F 806R
ERR139028	ggs400	human	adult	USA	urban	42	female	Yatsunenko2012	Mother	ERR139028	1640885	illumina	v4	515F 806R
ERR139029	ggs472	human	adult	USA	urban	50	male	Yatsunenko2012	Father	ERR139029	2588062	illumina	v4	515F 806R
ERR139030	ggs414	human	adult	USA	urban	43	female	Yatsunenko2012	Mother	ERR139030	1108186	illumina	v4	515F 806R
ERR139031	ggs73	human	child	Malawi	rural_farming	0.05	male	Yatsunenko2012	Twin1	ERR139031	823677	illumina	v4	515F 806R
ERR139032	ggs376	human	adult	USA	urban	15	male	Yatsunenko2012	Twin1	ERR139032	2641727	illumina	v4	515F 806R
ERR139033	ggs127	human	adult	USA	urban	53	female	Yatsunenko2012	Mother	ERR139033	2388895	illumina	v4	515F 806R
ERR139034	ggs307	human	adult	Venezuela	rural_farming	31	female	Yatsunenko2012	Mother	ERR139034	1200265	illumina	v4	515F 806R
ERR139035	ggs81	human	child	Malawi	rural_farming	0.94	female	Yatsunenko2012	Twin1	ERR139035	1053981	illumina	v4	515F 806R
ERR139036	ggs282	human	adolescent	Venezuela	rural_farming	12	female	Yatsunenko2012	unknown	ERR139036	4145743	illumina	v4	515F 806R
ERR139037	ggs153	human	child	USA	urban	5	female	Yatsunenko2012	Child	ERR139037	1709032	illumina	v4	515F 806R
ERR139038	ggs247	human	child	Venezuela	rural_farming	9	NA	Yatsunenko2012	unknown	ERR139038	1373661	illumina	v4	515F 806R
ERR139039	ggs17	human	adult	Malawi	rural_farming	NA	female	Yatsunenko2012	Mother	ERR139039	1868018	illumina	v4	515F 806R
ERR139040	ggs251	human	child	Venezuela	rural_farming	1.67	male	Yatsunenko2012	unknown	ERR139040	2048652	illumina	v4	515F 806R
ERR139041	ggs214	human	child	USA	urban	1.6	male	Yatsunenko2012	Child	ERR139041	2271492	illumina	v4	515F 806R
ERR139042	ggs179	human	child	USA	urban	0.67	female	Yatsunenko2012	Twin2	ERR139042	1743000	illumina	v4	515F 806R
ERR139043	ggs134	human	adult	USA	urban	30	female	Yatsunenko2012	Twin1	ERR139043	2280109	illumina	v4	515F 806R
ERR139044	ggs527	human	adult	USA	urban	45	male	Yatsunenko2012	Father	ERR139044	2205529	illumina	v4	515F 806R
ERR139045	ggs7	human	child	Malawi	rural_farming	0.43	male	Yatsunenko2012	Twin1	ERR139045	1577643	illumina	v4	515F 806R
ERR139046	ggs372	human	child	USA	urban	9	male	Yatsunenko2012	Brother1	ERR139046	2434361	illumina	v4	515F 806R
ERR139047	ggs337	human	adolescent	USA	urban	14	male	Yatsunenko2012	Twin1	ERR139047	1536284	illumina	v4	515F 806R
ERR139048	ggs408	human	adult	USA	urban	15	male	Yatsunenko2012	Twin2	ERR139048	1241761	illumina	v4	515F 806R
ERR139049	ggs29	human	child	Malawi	rural_farming	0.44	male	Yatsunenko2012	Twin2	ERR139049	1799732	illumina	v4	515F 806R
ERR139050	ggs143	human	child	USA	urban	0.17	female	Yatsunenko2012	Twin1	ERR139050	1639828	illumina	v4	515F 806R
ERR139051	ggs93	human	child	Malawi	rural_farming	1.7	male	Yatsunenko2012	Twin1	ERR139051	1993442	illumina	v4	515F 806R
ERR139052	ggs201	human	child	USA	urban	6	male	Yatsunenko2012	Child	ERR139052	2000306	illumina	v4	515F 806R
ERR139053	ggs290	human	adult	Venezuela	rural_farming	24	female	Yatsunenko2012	Mother	ERR139053	1575823	illumina	v4	515F 806R
ERR139054	ggs243	human	adolescent	Venezuela	rural_farming	11	female	Yatsunenko2012	Sister	ERR139054	2037510	illumina	v4	515F 806R
ERR139055	ggs253	human	child	Venezuela	rural_farming	7	NA	Yatsunenko2012	unknown	ERR139055	1390912	illumina	v4	515F 806R
ERR139056	ggs518	human	adult	USA	urban	15	female	Yatsunenko2012	Twin1	ERR139056	1946039	illumina	v4	515F 806R
ERR139057	ggs497	human	adult	USA	urban	16	male	Yatsunenko2012	Twin2	ERR139057	1661824	illumina	v4	515F 806R
ERR139058	ggs417	human	adult	USA	urban	44	female	Yatsunenko2012	Mother	ERR139058	308790	illumina	v4	515F 806R
ERR139059	ggs36	human	NA	Malawi	rural_farming	NA	NA	Yatsunenko2012	Sibling	ERR139059	2094943	illumina	v4	515F 806R
ERR139060	ggs451	human	adult	USA	urban	16	female	Yatsunenko2012	Twin1	ERR139060	2164649	illumina	v4	515F 806R
ERR139061	ggs74	human	child	Malawi	rural_farming	0.05	male	Yatsunenko2012	Twin2	ERR139061	1001574	illumina	v4	515F 806R
ERR139062	ggs299	human	child	Venezuela	rural_farming	2	male	Yatsunenko2012	Son	ERR139062	1139561	illumina	v4	515F 806R
ERR139063	ggs346	human	adult	USA	urban	16	male	Yatsunenko2012	Twin1	ERR139063	2231654	illumina	v4	515F 806R
ERR139064	ggs486	human	adolescent	USA	urban	14	female	Yatsunenko2012	Twin1	ERR139064	3041169	illumina	v4	515F 806R
ERR139065	ggs465	human	adult	USA	urban	51	male	Yatsunenko2012	Father	ERR139065	2574109	illumina	v4	515F 806R
ERR139066	ggs305	human	adult	Venezuela	rural_farming	29	female	Yatsunenko2012	Daughter	ERR139066	2152618	illumina	v4	515F 806R
ERR139067	ggs350	human	adult	USA	urban	44	female	Yatsunenko2012	Mother	ERR139067	2160199	illumina	v4	515F 806R
ERR139068	ggs314	human	adult	Venezuela	rural_farming	83.2	male	Yatsunenko2012	Father	ERR139068	1814468	illumina	v4	515F 806R
ERR139069	ggs405	human	adolescent	USA	urban	14	female	Yatsunenko2012	Twin2	ERR139069	2013902	illumina	v4	515F 806R
ERR139070	ggs182	human	child	USA	urban	0.75	female	Yatsunenko2012	Twin1	ERR139070	1238096	illumina	v4	515F 806R
ERR139071	ggs304	human	child	Venezuela	rural_farming	4	male	Yatsunenko2012	Brother	ERR139071	1383137	illumina	v4	515F 806R
ERR139072	ggs289	human	adult	Venezuela	rural_farming	40	female	Yatsunenko2012	Mother	ERR139072	1114025	illumina	v4	515F 806R
ERR139073	ggs353	human	adult	USA	urban	46	female	Yatsunenko2012	Mother	ERR139073	2803356	illumina	v4	515F 806R
ERR139074	ggs166	human	child	USA	urban	0.17	female	Yatsunenko2012	Twin1	ERR139074	1142698	illumina	v4	515F 806R
ERR139075	ggs32	human	child	Malawi	rural_farming	0.21	male	Yatsunenko2012	Twin1	ERR139075	1819974	illumina	v4	515F 806R
ERR139076	ggs128	human	adult	USA	urban	25	female	Yatsunenko2012	Twin1	ERR139076	2103394	illumina	v4	515F 806R
ERR139077	ggs148	human	child	USA	urban	0.42	male	Yatsunenko2012	Twin2	ERR139077	1602055	illumina	v4	515F 806R
ERR139078	ggs271	human	child	Venezuela	rural_farming	4	male	Yatsunenko2012	Son	ERR139078	2170533	illumina	v4	515F 806R
ERR139079	ggs204	human	child	USA	urban	1	female	Yatsunenko2012	Child	ERR139079	1807267	illumina	v4	515F 806R
ERR139080	ggs311	human	adolescent	Venezuela	rural_farming	11	male	Yatsunenko2012	unknown	ERR139080	808222	illumina	v4	515F 806R
ERR139081	ggs126	human	adult	USA	urban	25	female	Yatsunenko2012	Twin2	ERR139081	490317	illumina	v4	515F 806R
ERR139082	ggs3	human	adult	Malawi	rural_farming	24	female	Yatsunenko2012	Mother	ERR139082	1964475	illumina	v4	515F 806R
ERR139083	ggs485	human	adult	USA	urban	50	male	Yatsunenko2012	Father	ERR139083	2346879	illumina	v4	515F 806R
ERR139084	ggs1	human	child	Malawi	rural_farming	1.53	female	Yatsunenko2012	Twin1	ERR139084	1686497	illumina	v4	515F 806R
ERR139085	ggs200	human	adult	USA	urban	44	female	Yatsunenko2012	Mother	ERR139085	2214590	illumina	v4	515F 806R
ERR139086	ggs264	human	child	Venezuela	rural_farming	9	NA	Yatsunenko2012	unknown	ERR139086	2100879	illumina	v4	515F 806R
ERR139087	ggs369	human	adolescent	USA	urban	14	male	Yatsunenko2012	Twin1	ERR139087	2395247	illumina	v4	515F 806R
ERR139088	ggs254	human	adult	Venezuela	rural_farming	39	male	Yatsunenko2012	unknown	ERR139088	2461335	illumina	v4	515F 806R
ERR139089	ggs54	human	adult	Malawi	rural_farming	33	female	Yatsunenko2012	Mother	ERR139089	2521139	illumina	v4	515F 806R
ERR139090	ggs477	human	adult	USA	urban	46	female	Yatsunenko2012	Mother	ERR139090	2783147	illumina	v4	515F 806R
ERR139091	ggs309	human	adult	Venezuela	rural_farming	22	female	Yatsunenko2012	SisterAdlt	ERR139091	1684857	illumina	v4	515F 806R
ERR139092	ggs155	human	child	USA	urban	6	female	Yatsunenko2012	Child	ERR139092	449225	illumina	v4	515F 806R
ERR139093	ggs504	human	adult	USA	urban	16	female	Yatsunenko2012	Twin2	ERR139093	1783765	illumina	v4	515F 806R
ERR139094	ggs387	human	adult	USA	urban	41	female	Yatsunenko2012	Mother	ERR139094	1780205	illumina	v4	515F 806R
ERR139095	ggs178	human	child	USA	urban	0.67	female	Yatsunenko2012	Twin1	ERR139095	1919191	illumina	v4	515F 806R
ERR139096	ggs120	human	adult	USA	urban	NA	female	Yatsunenko2012	Mother	ERR139096	2132102	illumina	v4	515F 806R
ERR139097	ggs508	human	adult	USA	urban	55	female	Yatsunenko2012	Mother	ERR139097	1978733	illumina	v4	515F 806R
ERR139098	ggs293	human	adult	Venezuela	rural_farming	21	female	Yatsunenko2012	unknown	ERR139098	923605	illumina	v4	515F 806R
ERR139099	ggs203	human	adult	USA	urban	26	female	Yatsunenko2012	Mother	ERR139099	1940168	illumina	v4	515F 806R
ERR139100	ggs285	human	child	Venezuela	rural_farming	10	male	Yatsunenko2012	Son	ERR139100	2848449	illumina	v4	515F 806R
ERR139101	ggs151	human	child	USA	urban	0.5	female	Yatsunenko2012	Twin1	ERR139101	2052316	illumina	v4	515F 806R
ERR139102	ggs500	human	adolescent	USA	urban	14	female	Yatsunenko2012	Twin1	ERR139102	1831038	illumina	v4	515F 806R
ERR139103	ggs300	human	child	Venezuela	rural_farming	3	male	Yatsunenko2012	unknown	ERR139103	1638846	illumina	v4	515F 806R
ERR139104	ggs490	human	adult	USA	urban	47	female	Yatsunenko2012	Mother	ERR139104	2741180	illumina	v4	515F 806R
ERR139105	ggs481	human	adolescent	USA	urban	14	female	Yatsunenko2012	Twin1	ERR139105	2230756	illumina	v4	515F 806R
ERR139106	ggs70	human	child	Malawi	rural_farming	0.95	male	Yatsunenko2012	Twin2	ERR139106	1692525	illumina	v4	515F 806R
ERR139107	ggs354	human	adult	USA	urban	16	female	Yatsunenko2012	Twin1	ERR139107	2366958	illumina	v4	515F 806R
ERR139108	ggs361	human	adolescent	USA	urban	13	male	Yatsunenko2012	Twin2	ERR139108	2172575	illumina	v4	515F 806R
ERR139109	ggs131	human	adult	USA	urban	24	female	Yatsunenko2012	Twin1	ERR139109	2134858	illumina	v4	515F 806R
ERR139110	ggs422	human	adult	USA	urban	54	male	Yatsunenko2012	Father	ERR139110	2264937	illumina	v4	515F 806R
ERR139111	ggs185	human	child	USA	urban	0.42	female	Yatsunenko2012	Twin1	ERR139111	1673446	illumina	v4	515F 806R
ERR139112	ggs26	human	child	Malawi	rural_farming	2.65	female	Yatsunenko2012	Twin2	ERR139112	2378286	illumina	v4	515F 806R
ERR139113	ggs224	human	adult	Venezuela	rural_farming	53	male	Yatsunenko2012	FatherAdlt	ERR139113	1273901	illumina	v4	515F 806R
ERR139114	ggs315	human	adult	Venezuela	rural_farming	33	female	Yatsunenko2012	Mother	ERR139114	2192083	illumina	v4	515F 806R
ERR139115	ggs102	human	adult	Malawi	rural_farming	28	female	Yatsunenko2012	Mother	ERR139115	1838213	illumina	v4	515F 806R
ERR139116	ggs236	human	adolescent	Venezuela	rural_farming	11	male	Yatsunenko2012	Son	ERR139116	2575536	illumina	v4	515F 806R
ERR139117	ggs464	human	adolescent	USA	urban	14	male	Yatsunenko2012	Twin2	ERR139117	2533048	illumina	v4	515F 806R
ERR139118	ggs349	human	adult	USA	urban	45	male	Yatsunenko2012	Father	ERR139118	2533181	illumina	v4	515F 806R
ERR139119	ggs42	human	child	Malawi	rural_farming	1.35	female	Yatsunenko2012	Twin1	ERR139119	1668330	illumina	v4	515F 806R
ERR139120	ggs323	human	adult	USA	urban	57	male	Yatsunenko2012	Father	ERR139120	1460020	illumina	v4	515F 806R
ERR139121	ggs137	human	child	USA	urban	1	male	Yatsunenko2012	Child	ERR139121	2342248	illumina	v4	515F 806R
ERR139122	ggs163	human	adult	USA	urban	26	female	Yatsunenko2012	Twin2	ERR139122	1803749	illumina	v4	515F 806R
ERR139123	ggs205	human	child	USA	urban	1	male	Yatsunenko2012	Child	ERR139123	2477909	illumina	v4	515F 806R
ERR139124	ggs306	human	adult	Venezuela	rural_farming	37	female	Yatsunenko2012	SisterAdlt	ERR139124	1633017	illumina	v4	515F 806R
ERR139125	ggs104	human	child	Malawi	rural_farming	1.25	female	Yatsunenko2012	Twin1	ERR139125	1384073	illumina	v4	515F 806R
ERR139126	ggs266	human	adult	Venezuela	rural_farming	15	female	Yatsunenko2012	Sister	ERR139126	3356710	illumina	v4	515F 806R
ERR139127	ggs197	human	child	USA	urban	7	female	Yatsunenko2012	Child	ERR139127	2183545	illumina	v4	515F 806R
ERR139128	ggs176	human	child	USA	urban	0.58	female	Yatsunenko2012	unknown	ERR139128	1819747	illumina	v4	515F 806R
ERR139129	ggs385	human	adult	USA	urban	52	female	Yatsunenko2012	Mother	ERR139129	1712895	illumina	v4	515F 806R
ERR139130	ggs383	human	adolescent	USA	urban	13	male	Yatsunenko2012	Twin1	ERR139130	1429445	illumina	v4	515F 806R
ERR139131	ggs145	human	child	USA	urban	0.42	female	Yatsunenko2012	Twin1	ERR139131	2305480	illumina	v4	515F 806R
ERR139132	ggs162	human	adult	USA	urban	26	female	Yatsunenko2012	Twin1	ERR139132	1608279	illumina	v4	515F 806R
ERR139133	ggs288	human	adult	Venezuela	rural_farming	NA	female	Yatsunenko2012	unknown	ERR139133	1053320	illumina	v4	515F 806R
ERR139134	ggs294	human	child	Venezuela	rural_farming	0.417	female	Yatsunenko2012	Sister	ERR139134	1104609	illumina	v4	515F 806R
ERR139135	ggs452	human	adult	USA	urban	15	female	Yatsunenko2012	Twin1	ERR139135	2188303	illumina	v4	515F 806R
ERR139136	ggs270	human	adult	Venezuela	rural_farming	74	male	Yatsunenko2012	unknown	ERR139136	3094256	illumina	v4	515F 806R
ERR139137	ggs121	human	adult	USA	urban	26	female	Yatsunenko2012	Twin1	ERR139137	1934314	illumina	v4	515F 806R
ERR139138	ggs280	human	child	Venezuela	rural_farming	4	male	Yatsunenko2012	unknown	ERR139138	4441481	illumina	v4	515F 806R
ERR139139	ggs344	human	adult	USA	urban	47	female	Yatsunenko2012	Mother	ERR139139	2079077	illumina	v4	515F 806R
ERR139140	ggs428	human	adolescent	USA	urban	14	female	Yatsunenko2012	Twin2	ERR139140	2554453	illumina	v4	515F 806R
ERR139141	ggs18	human	NA	Malawi	rural_farming	NA	NA	Yatsunenko2012	Sibling	ERR139141	1930965	illumina	v4	515F 806R
ERR139142	ggs406	human	child	USA	urban	7	male	Yatsunenko2012	Brother1	ERR139142	1989752	illumina	v4	515F 806R
ERR139143	ggs429	human	adult	USA	urban	15	male	Yatsunenko2012	Twin2	ERR139143	2334248	illumina	v4	515F 806R
ERR139144	ggs79	human	child	Malawi	rural_farming	1.89	male	Yatsunenko2012	Twin1	ERR139144	784660	illumina	v4	515F 806R
ERR139145	ggs99	human	NA	Malawi	rural_farming	NA	NA	Yatsunenko2012	Sibling	ERR139145	1810923	illumina	v4	515F 806R
ERR139146	ggs521	human	adult	USA	urban	15	female	Yatsunenko2012	Twin1	ERR139146	1848837	illumina	v4	515F 806R
ERR139147	ggs45	human	adult	Malawi	rural_farming	21	female	Yatsunenko2012	Mother	ERR139147	2475812	illumina	v4	515F 806R
ERR139148	ggs260	human	child	Venezuela	rural_farming	1.17	female	Yatsunenko2012	unknown	ERR139148	1694804	illumina	v4	515F 806R
ERR139149	ggs322	human	adult	USA	urban	54	female	Yatsunenko2012	Mother	ERR139149	1453889	illumina	v4	515F 806R
ERR139150	ggs493	human	adult	USA	urban	16	female	Yatsunenko2012	Twin2	ERR139150	2488542	illumina	v4	515F 806R
ERR139151	ggs164	human	adult	USA	urban	NA	female	Yatsunenko2012	Mother	ERR139151	1818906	illumina	v4	515F 806R
ERR139152	ggs245	human	adult	Venezuela	rural_farming	18	female	Yatsunenko2012	Sister	ERR139152	1765753	illumina	v4	515F 806R
ERR139153	ggs119	human	adult	USA	urban	25	female	Yatsunenko2012	Twin2	ERR139153	742187	illumina	v4	515F 806R
ERR139154	ggs439	human	adult	USA	urban	16	female	Yatsunenko2012	Twin1	ERR139154	2943122	illumina	v4	515F 806R
ERR139155	ggs218	human	adult	USA	urban	23	female	Yatsunenko2012	Twin1	ERR139155	1768210	illumina	v4	515F 806R
ERR139156	ggs100	human	child	Malawi	rural_farming	0.76	male	Yatsunenko2012	Twin1	ERR139156	1290782	illumina	v4	515F 806R
ERR139157	ggs106	human	adult	Malawi	rural_farming	24	female	Yatsunenko2012	Mother	ERR139157	2028470	illumina	v4	515F 806R
ERR139158	ggs6	human	adult	Malawi	rural_farming	26	female	Yatsunenko2012	Mother	ERR139158	1303124	illumina	v4	515F 806R
ERR139159	ggs431	human	adult	USA	urban	46	male	Yatsunenko2012	Father	ERR139159	2300566	illumina	v4	515F 806R
ERR139160	ggs226	human	child	Venezuela	rural_farming	4	NA	Yatsunenko2012	unknown	ERR139160	2243927	illumina	v4	515F 806R
ERR139161	ggs528	human	adult	USA	urban	15	male	Yatsunenko2012	Twin2	ERR139161	1790923	illumina	v4	515F 806R
ERR139162	ggs196	human	child	USA	urban	5	female	Yatsunenko2012	Child	ERR139162	2498219	illumina	v4	515F 806R
ERR139163	ggs154	human	adult	USA	urban	24	female	Yatsunenko2012	Mother	ERR139163	1990382	illumina	v4	515F 806R
ERR139164	ggs140	human	child	USA	urban	0.08	male	Yatsunenko2012	Twin2	ERR139164	614958	illumina	v4	515F 806R
ERR139165	ggs188	human	child	USA	urban	0.08	male	Yatsunenko2012	Twin2	ERR139165	1808461	illumina	v4	515F 806R
ERR139166	ggs377	human	adult	USA	urban	15	male	Yatsunenko2012	Twin2	ERR139166	2591284	illumina	v4	515F 806R
ERR139167	ggs46	human	child	Malawi	rural_farming	0.56	female	Yatsunenko2012	Twin1	ERR139167	1708940	illumina	v4	515F 806R
ERR139168	ggs331	human	adult	USA	urban	47	female	Yatsunenko2012	Mother	ERR139168	1317533	illumina	v4	515F 806R
ERR139169	ggs454	human	adult	USA	urban	15	female	Yatsunenko2012	Twin1	ERR139169	2570392	illumina	v4	515F 806R
ERR139170	ggs256	human	adult	Venezuela	rural_farming	56	female	Yatsunenko2012	unknown	ERR139170	3103946	illumina	v4	515F 806R
ERR139171	ggs222	human	child	Venezuela	rural_farming	2	male	Yatsunenko2012	unknown	ERR139171	2485238	illumina	v4	515F 806R
ERR139172	ggs75	human	adult	Malawi	rural_farming	NA	female	Yatsunenko2012	Mother	ERR139172	1556507	illumina	v4	515F 806R
ERR139173	ggs476	human	child	USA	urban	7	female	Yatsunenko2012	Sister1	ERR139173	2355372	illumina	v4	515F 806R
ERR139174	ggs193	human	adult	USA	urban	40	female	Yatsunenko2012	Mother	ERR139174	1606179	illumina	v4	515F 806R
ERR139175	ggs370	human	adolescent	USA	urban	14	male	Yatsunenko2012	Twin2	ERR139175	2308700	illumina	v4	515F 806R
ERR139176	ggs210	human	child	USA	urban	6	female	Yatsunenko2012	Child	ERR139176	2028996	illumina	v4	515F 806R
ERR139177	ggs392	human	adult	USA	urban	39	female	Yatsunenko2012	Mother	ERR139177	1710269	illumina	v4	515F 806R
ERR139178	ggs241	human	child	Venezuela	rural_farming	1.5	NA	Yatsunenko2012	unknown	ERR139178	1948366	illumina	v4	515F 806R
ERR139179	ggs398	human	adult	USA	urban	54	female	Yatsunenko2012	Mother	ERR139179	1468309	illumina	v4	515F 806R
ERR139180	ggs272	human	child	Venezuela	rural_farming	0.33	female	Yatsunenko2012	unknown	ERR139180	2369352	illumina	v4	515F 806R
ERR139181	ggs324	human	adult	USA	urban	30	female	Yatsunenko2012	Mother	ERR139181	826310	illumina	v4	515F 806R
ERR139182	ggs15	human	child	Malawi	rural_farming	2.39	female	Yatsunenko2012	Twin1	ERR139182	2157554	illumina	v4	515F 806R
ERR139183	ggs455	human	adult	USA	urban	49	female	Yatsunenko2012	Mother	ERR139183	2902574	illumina	v4	515F 806R
ERR139184	ggs50	human	adult	Malawi	rural_farming	NA	female	Yatsunenko2012	Mother	ERR139184	1503765	illumina	v4	515F 806R
ERR139185	ggs172	human	child	USA	urban	0.33	male	Yatsunenko2012	Twin1	ERR139185	1954757	illumina	v4	515F 806R
ERR139186	ggs327	human	adult	USA	urban	15	male	Yatsunenko2012	Twin1	ERR139186	1437106	illumina	v4	515F 806R
ERR139187	ggs255	human	child	Venezuela	rural_farming	7	NA	Yatsunenko2012	unknown	ERR139187	1695383	illumina	v4	515F 806R
ERR139188	ggs161	human	adult	USA	urban	NA	female	Yatsunenko2012	Mother	ERR139188	1705557	illumina	v4	515F 806R
ERR139189	ggs445	human	adult	USA	urban	52	male	Yatsunenko2012	Father	ERR139189	2194938	illumina	v4	515F 806R
ERR139190	ggs248	human	adult	Venezuela	rural_farming	80	male	Yatsunenko2012	Father	ERR139190	1793460	illumina	v4	515F 806R
ERR139191	ggs367	human	adult	USA	urban	15	male	Yatsunenko2012	Twin2	ERR139191	2003071	illumina	v4	515F 806R
ERR139192	ggs33	human	child	Malawi	rural_farming	0.21	male	Yatsunenko2012	Twin2	ERR139192	1672889	illumina	v4	515F 806R
ERR139193	ggs519	human	adult	USA	urban	49	female	Yatsunenko2012	Mother	ERR139193	1845266	illumina	v4	515F 806R
ERR139194	ggs502	human	adult	USA	urban	44	male	Yatsunenko2012	Father	ERR139194	1866452	illumina	v4	515F 806R
ERR139195	ggs365	human	adult	USA	urban	43	female	Yatsunenko2012	Mother	ERR139195	2613354	illumina	v4	515F 806R
ERR139196	ggs478	human	adult	USA	urban	16	female	Yatsunenko2012	Twin1	ERR139196	3616864	illumina	v4	515F 806R
ERR139197	ggs356	human	adult	USA	urban	46	female	Yatsunenko2012	Mother	ERR139197	2159787	illumina	v4	515F 806R
ERR139198	ggs495	human	adult	USA	urban	15	female	Yatsunenko2012	Twin2	ERR139198	1597224	illumina	v4	515F 806R
ERR139199	ggs27	human	adult	Malawi	rural_farming	20	female	Yatsunenko2012	Mother	ERR139199	2052139	illumina	v4	515F 806R
ERR139200	ggs328	human	child	USA	urban	10	female	Yatsunenko2012	AdoptedSister	ERR139200	1812872	illumina	v4	515F 806R
ERR139201	ggs273	human	adult	Venezuela	rural_farming	NA	female	Yatsunenko2012	Cousin	ERR139201	1488974	illumina	v4	515F 806R
ERR139202	ggs413	human	adolescent	USA	urban	14	female	Yatsunenko2012	Twin2	ERR139202	1499744	illumina	v4	515F 806R
ERR139203	ggs160	human	adult	USA	urban	27	female	Yatsunenko2012	Twin2	ERR139203	1420263	illumina	v4	515F 806R
ERR139204	ggs114	human	adult	Malawi	rural_farming	NA	female	Yatsunenko2012	Mother	ERR139204	1388522	illumina	v4	515F 806R
ERR139205	ggs296	human	child	Venezuela	rural_farming	0.5	female	Yatsunenko2012	Daughter	ERR139205	1167756	illumina	v4	515F 806R
ERR139206	ggs410	human	adolescent	USA	urban	14	male	Yatsunenko2012	Twin2	ERR139206	1201364	illumina	v4	515F 806R
ERR139207	ggs58	human	NA	Malawi	rural_farming	NA	NA	Yatsunenko2012	Sibling	ERR139207	1684185	illumina	v4	515F 806R
ERR139208	ggs60	human	child	Malawi	rural_farming	0.11	female	Yatsunenko2012	Twin2	ERR139208	1438340	illumina	v4	515F 806R
ERR139209	ggs423	human	adult	USA	urban	16	female	Yatsunenko2012	Twin1	ERR139209	2610548	illumina	v4	515F 806R
ERR139210	ggs396	human	adult	USA	urban	45	female	Yatsunenko2012	Mother	ERR139210	1600111	illumina	v4	515F 806R
ERR139211	ggs320	human	adolescent	USA	urban	14	female	Yatsunenko2012	Twin1	ERR139211	1693750	illumina	v4	515F 806R
ERR139212	ggs165	human	adult	USA	urban	28	female	Yatsunenko2012	Twin1	ERR139212	1806347	illumina	v4	515F 806R
ERR139213	ggs301	human	child	Venezuela	rural_farming	2	female	Yatsunenko2012	Daughter	ERR139213	1236723	illumina	v4	515F 806R
ERR139214	ggs235	human	adult	Venezuela	rural_farming	28	female	Yatsunenko2012	Mother	ERR139214	1604119	illumina	v4	515F 806R
ERR139215	ggs219	human	adult	USA	urban	23	female	Yatsunenko2012	Twin2	ERR139215	2081579	illumina	v4	515F 806R
ERR139216	ggs363	human	adolescent	USA	urban	14	male	Yatsunenko2012	Twin1	ERR139216	1988831	illumina	v4	515F 806R
ERR139217	ggs279	human	child	Venezuela	rural_farming	7	male	Yatsunenko2012	Son	ERR139217	769924	illumina	v4	515F 806R
ERR139218	ggs459	human	adult	USA	urban	47	female	Yatsunenko2012	Mother	ERR139218	2559764	illumina	v4	515F 806R
ERR139219	ggs24	human	adult	Malawi	rural_farming	33	female	Yatsunenko2012	Mother	ERR139219	2447037	illumina	v4	515F 806R
ERR139220	ggs463	human	adolescent	USA	urban	13	male	Yatsunenko2012	Twin1	ERR139220	3247038	illumina	v4	515F 806R
ERR139221	ggs480	human	adult	USA	urban	47	female	Yatsunenko2012	Mother	ERR139221	2435076	illumina	v4	515F 806R
ERR139222	ggs129	human	adult	USA	urban	25	female	Yatsunenko2012	Twin2	ERR139222	1977927	illumina	v4	515F 806R
ERR139223	ggs167	human	child	USA	urban	0.17	female	Yatsunenko2012	Twin2	ERR139223	1487184	illumina	v4	515F 806R
ERR139224	ggs441	human	adult	USA	urban	15	female	Yatsunenko2012	Twin2	ERR139224	2189780	illumina	v4	515F 806R
ERR139225	ggs227	human	child	Venezuela	rural_farming	4	male	Yatsunenko2012	Brother	ERR139225	1691406	illumina	v4	515F 806R
ERR139226	ggs21	human	adult	Malawi	rural_farming	NA	female	Yatsunenko2012	Mother	ERR139226	2343222	illumina	v4	515F 806R
ERR139227	ggs407	human	adult	USA	urban	16	male	Yatsunenko2012	Twin1	ERR139227	1670353	illumina	v4	515F 806R
ERR139228	ggs355	human	adult	USA	urban	16	male	Yatsunenko2012	Twin2	ERR139228	1984589	illumina	v4	515F 806R
ERR139229	ggs40	human	adult	Malawi	rural_farming	32	female	Yatsunenko2012	Mother	ERR139229	2311680	illumina	v4	515F 806R
ERR139230	ggs141	human	child	USA	urban	0.08	male	Yatsunenko2012	Twin1	ERR139230	1736483	illumina	v4	515F 806R
ERR139231	ggs194	human	child	USA	urban	6	male	Yatsunenko2012	Child	ERR139231	2040472	illumina	v4	515F 806R
ERR139232	ggs230	human	child	Venezuela	rural_farming	1.17	female	Yatsunenko2012	unknown	ERR139232	2800794	illumina	v4	515F 806R
ERR139233	ggs90	human	child	Malawi	rural_farming	2.05	female	Yatsunenko2012	Twin2	ERR139233	1635076	illumina	v4	515F 806R
ERR139234	ggs287	human	adult	Venezuela	rural_farming	66	male	Yatsunenko2012	Grandfather	ERR139234	470817	illumina	v4	515F 806R
ERR139235	ggs364	human	adolescent	USA	urban	14	male	Yatsunenko2012	Twin2	ERR139235	2418722	illumina	v4	515F 806R
ERR139236	ggs409	human	adult	USA	urban	50	female	Yatsunenko2012	Mother	ERR139236	1483131	illumina	v4	515F 806R
ERR139237	ggs173	human	child	USA	urban	0.33	female	Yatsunenko2012	Twin2	ERR139237	1815185	illumina	v4	515F 806R
ERR139238	ggs87	human	adult	Malawi	rural_farming	NA	female	Yatsunenko2012	Mother	ERR139238	1917105	illumina	v4	515F 806R
ERR139239	ggs25	human	child	Malawi	rural_farming	2.65	female	Yatsunenko2012	Twin1	ERR139239	2190373	illumina	v4	515F 806R
ERR139240	ggs505	human	adult	USA	urban	50	female	Yatsunenko2012	Mother	ERR139240	1854839	illumina	v4	515F 806R
ERR139241	ggs520	human	adult	USA	urban	49	male	Yatsunenko2012	Father	ERR139241	1499934	illumina	v4	515F 806R
ERR139242	ggs267	human	child	Venezuela	rural_farming	3	female	Yatsunenko2012	unknown	ERR139242	1581669	illumina	v4	515F 806R
ERR139243	ggs275	human	child	Venezuela	rural_farming	0.917	female	Yatsunenko2012	unknown	ERR139243	2280656	illumina	v4	515F 806R
ERR139244	ggs345	human	adult	USA	urban	54	male	Yatsunenko2012	Father	ERR139244	1945821	illumina	v4	515F 806R
ERR139245	ggs525	human	adolescent	USA	urban	14	male	Yatsunenko2012	Twin2	ERR139245	1589372	illumina	v4	515F 806R
ERR139246	ggs435	human	adolescent	USA	urban	14	male	Yatsunenko2012	Twin2	ERR139246	2488834	illumina	v4	515F 806R
ERR139247	ggs53	human	child	Malawi	rural_farming	0.67	male	Yatsunenko2012	Twin2	ERR139247	1426973	illumina	v4	515F 806R
ERR139248	ggs492	human	adult	USA	urban	15	male	Yatsunenko2012	Twin1	ERR139248	2246572	illumina	v4	515F 806R
ERR139249	ggs362	human	adult	USA	urban	46	male	Yatsunenko2012	Father	ERR139249	2295914	illumina	v4	515F 806R
ERR139250	ggs281	human	adolescent	Venezuela	rural_farming	11	male	Yatsunenko2012	unknown	ERR139250	1166336	illumina	v4	515F 806R
ERR139251	ggs458	human	adult	USA	urban	43	male	Yatsunenko2012	Father	ERR139251	3384912	illumina	v4	515F 806R
ERR139252	ggs232	human	child	Venezuela	rural_farming	0.25	male	Yatsunenko2012	Brother	ERR139252	2106427	illumina	v4	515F 806R
ERR139253	ggs55	human	child	Malawi	rural_farming	0.19	male	Yatsunenko2012	Twin1	ERR139253	1453892	illumina	v4	515F 806R
ERR139254	ggs168	human	child	USA	urban	0.25	male	Yatsunenko2012	Twin1	ERR139254	1734408	illumina	v4	515F 806R
ERR139255	ggs238	human	child	USA	urban	0.42	male	Yatsunenko2012	unknown	ERR139255	1971765	illumina	v4	515F 806R
ERR139256	ggs139	human	child	USA	urban	0.08	male	Yatsunenko2012	Twin1	ERR139256	1996239	illumina	v4	515F 806R
ERR139257	ggs474	human	adult	USA	urban	44	male	Yatsunenko2012	Father	ERR139257	2543159	illumina	v4	515F 806R
ERR139258	ggs152	human	child	USA	urban	0.5	female	Yatsunenko2012	Twin2	ERR139258	2600449	illumina	v4	515F 806R
ERR139259	ggs357	human	adolescent	USA	urban	13	female	Yatsunenko2012	Twin1	ERR139259	2237954	illumina	v4	515F 806R
ERR139260	ggs110	human	adult	Malawi	rural_farming	24.03	female	Yatsunenko2012	Mother	ERR139260	1823586	illumina	v4	515F 806R
ERR139261	ggs482	human	adolescent	USA	urban	14	female	Yatsunenko2012	Twin2	ERR139261	2578577	illumina	v4	515F 806R
ERR139262	ggs471	human	adult	USA	urban	41	male	Yatsunenko2012	Father	ERR139262	906126	illumina	v4	515F 806R
ERR139263	ggs371	human	adult	USA	urban	43	female	Yatsunenko2012	Mother	ERR139263	2236442	illumina	v4	515F 806R
ERR139264	ggs57	human	adult	Malawi	rural_farming	23	female	Yatsunenko2012	Mother	ERR139264	2072863	illumina	v4	515F 806R
ERR139265	ggs116	human	adult	USA	urban	28	female	Yatsunenko2012	Twin2	ERR139265	1619201	illumina	v4	515F 806R
ERR139266	ggs177	human	child	USA	urban	0.58	female	Yatsunenko2012	unknown	ERR139266	1594228	illumina	v4	515F 806R
ERR139267	ggs401	human	adolescent	USA	urban	14	male	Yatsunenko2012	Twin1	ERR139267	1979044	illumina	v4	515F 806R
ERR139268	ggs378	human	adult	USA	urban	39	female	Yatsunenko2012	Mother	ERR139268	2905759	illumina	v4	515F 806R
ERR139269	ggs76	human	child	Malawi	rural_farming	0.39	male	Yatsunenko2012	Twin2	ERR139269	1785982	illumina	v4	515F 806R
ERR139270	ggs325	human	adolescent	USA	urban	14	female	Yatsunenko2012	Twin1	ERR139270	1437598	illumina	v4	515F 806R
ERR139271	ggs20	human	child	Malawi	rural_farming	1.22	male	Yatsunenko2012	Twin2	ERR139271	2549910	illumina	v4	515F 806R
ERR139272	ggs71	human	adult	Malawi	rural_farming	24	female	Yatsunenko2012	Mother	ERR139272	2201404	illumina	v4	515F 806R
ERR139273	ggs514	human	adult	USA	urban	51	female	Yatsunenko2012	Mother	ERR139273	2169332	illumina	v4	515F 806R
ERR139274	ggs28	human	child	Malawi	rural_farming	0.44	male	Yatsunenko2012	Twin1	ERR139274	1543564	illumina	v4	515F 806R
ERR139275	ggs347	human	adult	USA	urban	16	male	Yatsunenko2012	Twin2	ERR139275	2247578	illumina	v4	515F 806R
ERR139276	ggs144	human	child	USA	urban	0.17	female	Yatsunenko2012	Twin2	ERR139276	1590022	illumina	v4	515F 806R
ERR139277	ggs319	human	adult	Venezuela	rural_farming	60	male	Yatsunenko2012	Father	ERR139277	595674	illumina	v4	515F 806R
ERR139278	ggs468	human	adolescent	USA	urban	13	male	Yatsunenko2012	Twin1	ERR139278	2889619	illumina	v4	515F 806R
ERR139279	ggs189	human	child	USA	urban	0.25	female	Yatsunenko2012	Twin1	ERR139279	1141121	illumina	v4	515F 806R
ERR139280	ggs447	human	adult	USA	urban	15	female	Yatsunenko2012	Twin1	ERR139280	1729393	illumina	v4	515F 806R
ERR139281	ggs318	human	adult	Venezuela	rural_farming	23	female	Yatsunenko2012	SisterAdlt	ERR139281	1424848	illumina	v4	515F 806R
ERR139282	ggs88	human	NA	Malawi	rural_farming	NA	NA	Yatsunenko2012	Sibling	ERR139282	1764925	illumina	v4	515F 806R
ERR139283	ggs391	human	adult	USA	urban	15	male	Yatsunenko2012	Twin2	ERR139283	1626964	illumina	v4	515F 806R
ERR139284	ggs259	human	child	Venezuela	rural_farming	8	NA	Yatsunenko2012	unknown	ERR139284	1891855	illumina	v4	515F 806R
ERR139285	ggs263	human	child	Venezuela	rural_farming	10	female	Yatsunenko2012	Sister	ERR139285	1308393	illumina	v4	515F 806R
ERR139286	ggs340	human	adolescent	USA	urban	14	female	Yatsunenko2012	Twin1	ERR139286	1561602	illumina	v4	515F 806R
ERR139287	ggs118	human	adult	USA	urban	25	female	Yatsunenko2012	Twin1	ERR139287	1962015	illumina	v4	515F 806R
ERR139288	ggs117	human	adult	USA	urban	NA	female	Yatsunenko2012	Mother	ERR139288	1947452	illumina	v4	515F 806R
ERR139289	ggs425	human	adult	USA	urban	15	female	Yatsunenko2012	Twin2	ERR139289	2274152	illumina	v4	515F 806R
ERR139290	ggs159	human	adult	USA	urban	27	female	Yatsunenko2012	Twin1	ERR139290	1555130	illumina	v4	515F 806R
ERR139291	ggs51	human	NA	Malawi	rural_farming	NA	NA	Yatsunenko2012	Sibling	ERR139291	1904375	illumina	v4	515F 806R
ERR139292	ggs440	human	adult	USA	urban	52	male	Yatsunenko2012	Father	ERR139292	2286257	illumina	v4	515F 806R
ERR139293	ggs198	human	adult	USA	urban	45	female	Yatsunenko2012	Mother	ERR139293	2055046	illumina	v4	515F 806R
ERR139294	ggs384	human	adolescent	USA	urban	13	male	Yatsunenko2012	Twin2	ERR139294	1570627	illumina	v4	515F 806R
ERR139295	ggs240	human	child	Venezuela	rural_farming	3	female	Yatsunenko2012	Brother	ERR139295	6215290	illumina	v4	515F 806R
ERR139296	ggs333	human	adult	USA	urban	15	male	Yatsunenko2012	Twin2	ERR139296	1648588	illumina	v4	515F 806R
ERR139297	ggs317	human	adult	Venezuela	rural_farming	20	female	Yatsunenko2012	unknown	ERR139297	1056683	illumina	v4	515F 806R
ERR139298	ggs65	human	adult	Malawi	rural_farming	44	female	Yatsunenko2012	Mother	ERR139298	2486541	illumina	v4	515F 806R
ERR139299	ggs123	human	adult	USA	urban	28	female	Yatsunenko2012	Twin2	ERR139299	2240264	illumina	v4	515F 806R
ERR139300	ggs352	human	adult	USA	urban	16	female	Yatsunenko2012	Twin1	ERR139300	3107502	illumina	v4	515F 806R
ERR139301	ggs5	human	child	Malawi	rural_farming	1.3	female	Yatsunenko2012	Twin1	ERR139301	1021633	illumina	v4	515F 806R
ERR139302	ggs170	human	child	USA	urban	0.25	female	Yatsunenko2012	Twin1	ERR139302	1294131	illumina	v4	515F 806R
ERR139303	ggs12	human	child	Malawi	rural_farming	0.76	male	Yatsunenko2012	Twin1	ERR139303	1519143	illumina	v4	515F 806R
ERR139304	ggs284	human	adolescent	Venezuela	rural_farming	12	female	Yatsunenko2012	unknown	ERR139304	2385734	illumina	v4	515F 806R
ERR139305	ggs512	human	adult	USA	urban	47	female	Yatsunenko2012	Mother	ERR139305	2060953	illumina	v4	515F 806R
ERR139306	ggs351	human	adult	USA	urban	37	male	Yatsunenko2012	Father	ERR139306	2304581	illumina	v4	515F 806R
ERR139307	ggs61	human	adult	Malawi	rural_farming	NA	female	Yatsunenko2012	Mother	ERR139307	1875380	illumina	v4	515F 806R
ERR139308	ggs108	human	child	Malawi	rural_farming	2.02	female	Yatsunenko2012	Twin1	ERR139308	2083882	illumina	v4	515F 806R
ERR139309	ggs461	human	adult	USA	urban	50	male	Yatsunenko2012	Father	ERR139309	2872662	illumina	v4	515F 806R
ERR139310	ggs491	human	adult	USA	urban	40	male	Yatsunenko2012	Father	ERR139310	2878647	illumina	v4	515F 806R
ERR139311	ggs49	human	NA	Malawi	rural_farming	NA	NA	Yatsunenko2012	Sibling	ERR139311	2227742	illumina	v4	515F 806R
ERR139312	ggs246	human	adult	Venezuela	rural_farming	45	NA	Yatsunenko2012	unknown	ERR139312	3469084	illumina	v4	515F 806R
ERR139313	ggs386	human	adult	USA	urban	47	female	Yatsunenko2012	Mother	ERR139313	1646306	illumina	v4	515F 806R
ERR139314	ggs171	human	child	USA	urban	0.25	female	Yatsunenko2012	Twin2	ERR139314	1143047	illumina	v4	515F 806R
ERR139315	ggs313	human	adult	Venezuela	rural_farming	38	female	Yatsunenko2012	unknown	ERR139315	555219	illumina	v4	515F 806R
ERR139316	ggs147	human	child	USA	urban	0.42	male	Yatsunenko2012	Twin1	ERR139316	1947951	illumina	v4	515F 806R
ERR139317	ggs511	human	adult	USA	urban	43	female	Yatsunenko2012	Mother	ERR139317	1849259	illumina	v4	515F 806R
ERR139318	ggs488	human	adult	USA	urban	16	female	Yatsunenko2012	Twin1	ERR139318	3045435	illumina	v4	515F 806R
ERR139319	ggs366	human	adult	USA	urban	15	female	Yatsunenko2012	Twin1	ERR139319	2247151	illumina	v4	515F 806R
ERR139320	ggs135	human	adult	USA	urban	30	female	Yatsunenko2012	Twin2	ERR139320	2571254	illumina	v4	515F 806R
ERR139321	ggs430	human	adult	USA	urban	16	male	Yatsunenko2012	Twin2	ERR139321	2087196	illumina	v4	515F 806R
ERR139322	ggs69	human	child	Malawi	rural_farming	0.95	male	Yatsunenko2012	Twin1	ERR139322	1577758	illumina	v4	515F 806R
ERR139323	ggs41	human	NA	Malawi	rural_farming	NA	NA	Yatsunenko2012	Sibling	ERR139323	2335869	illumina	v4	515F 806R
ERR139324	ggs138	human	adult	USA	urban	36	female	Yatsunenko2012	Mother	ERR139324	2295124	illumina	v4	515F 806R
ERR139325	ggs438	human	adolescent	USA	urban	13	female	Yatsunenko2012	Twin1	ERR139325	2279537	illumina	v4	515F 806R
ERR139326	ggs44	human	child	Malawi	rural_farming	0.03	female	Yatsunenko2012	Twin1	ERR139326	1821345	illumina	v4	515F 806R
ERR139327	ggs522	human	adult	USA	urban	15	female	Yatsunenko2012	Twin2	ERR139327	1804713	illumina	v4	515F 806R
ERR139328	ggs208	human	child	USA	urban	4.5	female	Yatsunenko2012	Child	ERR139328	2092008	illumina	v4	515F 806R
ERR139329	ggs192	human	child	USA	urban	3	female	Yatsunenko2012	Child	ERR139329	1572070	illumina	v4	515F 806R
ERR139330	ggs103	human	FALSE	Malawi	rural_farming	NA	NA	Yatsunenko2012	Sibling	ERR139330	1649882	illumina	v4	515F 806R
ERR139331	ggs390	human	adult	USA	urban	36	female	Yatsunenko2012	Mother	ERR139331	1266799	illumina	v4	515F 806R
ERR139332	ggs233	human	child	Venezuela	rural_farming	6	male	Yatsunenko2012	Son	ERR139332	1482968	illumina	v4	515F 806R
ERR139333	ggs466	human	adult	USA	urban	16	male	Yatsunenko2012	Twin2	ERR139333	2989099	illumina	v4	515F 806R
ERR139334	ggs158	human	adult	USA	urban	NA	female	Yatsunenko2012	Mother	ERR139334	1589584	illumina	v4	515F 806R
ERR139335	ggs122	human	adult	USA	urban	26	female	Yatsunenko2012	Twin2	ERR139335	3026687	illumina	v4	515F 806R
ERR139336	ggs84	human	NA	Malawi	rural_farming	NA	NA	Yatsunenko2012	Sibling	ERR139336	1355745	illumina	v4	515F 806R
ERR139337	ggs59	human	child	Malawi	rural_farming	0.11	female	Yatsunenko2012	Twin1	ERR139337	768734	illumina	v4	515F 806R
ERR139338	ggs213	human	child	USA	urban	3	female	Yatsunenko2012	Child	ERR139338	2356475	illumina	v4	515F 806R
ERR139339	ggs338	human	adolescent	USA	urban	14	male	Yatsunenko2012	Twin2	ERR139339	1596824	illumina	v4	515F 806R
ERR139340	ggs498	human	adult	USA	urban	41	female	Yatsunenko2012	Mother	ERR139340	1706889	illumina	v4	515F 806R
ERR139341	ggs183	human	child	USA	urban	0.92	male	Yatsunenko2012	Twin1	ERR139341	1750171	illumina	v4	515F 806R
ERR139342	ggs342	human	adult	USA	urban	16	female	Yatsunenko2012	Twin1	ERR139342	1365341	illumina	v4	515F 806R
ERR139343	ggs444	human	adult	USA	urban	42	female	Yatsunenko2012	Mother	ERR139343	2374551	illumina	v4	515F 806R
ERR139344	ggs77	human	child	Malawi	rural_farming	0.39	female	Yatsunenko2012	Twin3	ERR139344	891197	illumina	v4	515F 806R
ERR139345	ggs115	human	adult	USA	urban	28	female	Yatsunenko2012	Twin1	ERR139345	2143704	illumina	v4	515F 806R
ERR139346	ggs427	human	child	USA	urban	2	female	Yatsunenko2012	AdoptedSister	ERR139346	2303853	illumina	v4	515F 806R
ERR139347	ggs373	human	adolescent	USA	urban	14	male	Yatsunenko2012	Twin1	ERR139347	2492418	illumina	v4	515F 806R
ERR139348	ggs212	human	adult	USA	urban	33	female	Yatsunenko2012	Mother	ERR139348	1952194	illumina	v4	515F 806R
ERR139349	ggs107	human	FALSE	Malawi	rural_farming	NA	NA	Yatsunenko2012	Sibling	ERR139349	1625122	illumina	v4	515F 806R
ERR139350	ggs13	human	adult	Malawi	rural_farming	NA	female	Yatsunenko2012	Mother	ERR139350	2006404	illumina	v4	515F 806R
ERR139351	ggs479	human	adult	USA	urban	16	male	Yatsunenko2012	Twin2	ERR139351	2865767	illumina	v4	515F 806R
ERR139352	ggs335	human	adult	USA	urban	43	female	Yatsunenko2012	Mother	ERR139352	1647679	illumina	v4	515F 806R
ERR139353	ggs89	human	child	Malawi	rural_farming	2.05	female	Yatsunenko2012	Twin1	ERR139353	2015049	illumina	v4	515F 806R
ERR139354	ggs133	human	adult	USA	urban	NA	female	Yatsunenko2012	Mother	ERR139354	2086206	illumina	v4	515F 806R
ERR139355	ggs268	human	adult	Venezuela	rural_farming	73	female	Yatsunenko2012	Grandmother	ERR139355	2224337	illumina	v4	515F 806R
ERR139356	ggs78	human	adult	Malawi	rural_farming	23	female	Yatsunenko2012	Mother	ERR139356	1208084	illumina	v4	515F 806R
ERR139357	ggs95	human	adult	Malawi	rural_farming	26	female	Yatsunenko2012	Mother	ERR139357	2649855	illumina	v4	515F 806R
ERR139358	ggs469	human	adult	USA	urban	42	female	Yatsunenko2012	Mother	ERR139358	2728174	illumina	v4	515F 806R
ERR139359	ggs380	human	adult	USA	urban	15	male	Yatsunenko2012	Twin1	ERR139359	2813275	illumina	v4	515F 806R
ERR139360	ggs432	human	child	USA	urban	9	male	Yatsunenko2012	Brother2	ERR139360	2381573	illumina	v4	515F 806R
ERR139361	ggs11	human	FALSE	Malawi	rural_farming	NA	NA	Yatsunenko2012	Sibling	ERR139361	1199214	illumina	v4	515F 806R
ERR139362	ggs215	human	child	USA	urban	1.3	male	Yatsunenko2012	Child	ERR139362	1792248	illumina	v4	515F 806R
ERR139363	ggs419	human	adult	USA	urban	16	male	Yatsunenko2012	Twin2	ERR139363	1967684	illumina	v4	515F 806R
ERR139364	ggs37	human	child	Malawi	rural_farming	2.02	male	Yatsunenko2012	Twin1	ERR139364	1849015	illumina	v4	515F 806R
ERR139365	ggs523	human	adult	USA	urban	44	male	Yatsunenko2012	Father	ERR139365	2042443	illumina	v4	515F 806R
ERR139366	ggs47	human	child	Malawi	rural_farming	0.56	female	Yatsunenko2012	Twin2	ERR139366	1203626	illumina	v4	515F 806R
ERR139367	ggs510	human	adult	USA	urban	16	female	Yatsunenko2012	Twin2	ERR139367	1876182	illumina	v4	515F 806R
ERR139368	ggs31	human	NA	Malawi	rural_farming	NA	NA	Yatsunenko2012	Sibling	ERR139368	2090597	illumina	v4	515F 806R
ERR139369	ggs418	human	adult	USA	urban	16	female	Yatsunenko2012	Twin1	ERR139369	1871085	illumina	v4	515F 806R
ERR139370	ggs330	human	adolescent	USA	urban	13	male	Yatsunenko2012	Twin2	ERR139370	1463633	illumina	v4	515F 806R
ERR139371	ggs220	human	child	Venezuela	rural_farming	1	male	Yatsunenko2012	unknown	ERR139371	1936528	illumina	v4	515F 806R
ERR139372	ggs113	human	adult	Malawi	rural_farming	16.72	female	Yatsunenko2012	Twin2	ERR139372	1845363	illumina	v4	515F 806R
ERR139373	ggs442	human	adult	USA	urban	15	female	Yatsunenko2012	Twin2	ERR139373	2111067	illumina	v4	515F 806R
ERR139374	ggs156	human	adult	USA	urban	29	female	Yatsunenko2012	Mother	ERR139374	2115053	illumina	v4	515F 806R
ERR139375	ggs308	human	adult	Venezuela	rural_farming	38	female	Yatsunenko2012	unknown	ERR139375	3018042	illumina	v4	515F 806R
ERR139376	ggs97	human	child	Malawi	rural_farming	1.89	male	Yatsunenko2012	Twin2	ERR139376	1615716	illumina	v4	515F 806R
ERR139377	ggs265	human	child	Venezuela	rural_farming	5	NA	Yatsunenko2012	unknown	ERR139377	1226099	illumina	v4	515F 806R
ERR139378	ggs389	human	adolescent	USA	urban	14	female	Yatsunenko2012	Twin1	ERR139378	1513571	illumina	v4	515F 806R
ERR139379	ggs484	human	adolescent	USA	urban	14	female	Yatsunenko2012	Twin2	ERR139379	2493125	illumina	v4	515F 806R
ERR139380	ggs473	human	adolescent	USA	urban	14	male	Yatsunenko2012	Twin1	ERR139380	2583568	illumina	v4	515F 806R
ERR139381	ggs526	human	adult	USA	urban	48	female	Yatsunenko2012	Mother	ERR139381	1719719	illumina	v4	515F 806R
ERR139382	ggs321	human	adolescent	USA	urban	14	female	Yatsunenko2012	Twin2	ERR139382	1459773	illumina	v4	515F 806R
ERR139383	ggs252	human	child	Venezuela	rural_farming	1	male	Yatsunenko2012	unknown	ERR139383	1391175	illumina	v4	515F 806R
ERR139384	ggs421	human	adult	USA	urban	16	male	Yatsunenko2012	Twin2	ERR139384	2273552	illumina	v4	515F 806R
ERR139385	ggs146	human	child	USA	urban	0.42	female	Yatsunenko2012	Twin2	ERR139385	1725331	illumina	v4	515F 806R
ERR139386	ggs216	human	adult	USA	urban	23	female	Yatsunenko2012	Twin1	ERR139386	2033649	illumina	v4	515F 806R
ERR139387	ggs244	human	child	Venezuela	rural_farming	5	male	Yatsunenko2012	Son	ERR139387	1133561	illumina	v4	515F 806R
ERR139388	ggs343	human	adult	USA	urban	15	male	Yatsunenko2012	Twin2	ERR139388	2072388	illumina	v4	515F 806R
ERR139389	ggs234	human	child	Venezuela	rural_farming	1	female	Yatsunenko2012	Daughter	ERR139389	1455369	illumina	v4	515F 806R
ERR139390	ggs85	human	child	Malawi	rural_farming	0.6	male	Yatsunenko2012	Twin1	ERR139390	1067123	illumina	v4	515F 806R
ERR139391	ggs180	human	child	USA	urban	0.75	male	Yatsunenko2012	Twin1	ERR139391	1592414	illumina	v4	515F 806R
ERR139392	ggs184	human	child	USA	urban	0.92	male	Yatsunenko2012	Twin2	ERR139392	1661147	illumina	v4	515F 806R
ERR139393	ggs98	human	adult	Malawi	rural_farming	25	female	Yatsunenko2012	Mother	ERR139393	1748085	illumina	v4	515F 806R
ERR139394	ggs368	human	adult	USA	urban	50	female	Yatsunenko2012	Mother	ERR139394	2636737	illumina	v4	515F 806R
ERR139395	ggs462	human	adult	USA	urban	46	female	Yatsunenko2012	Mother	ERR139395	2909715	illumina	v4	515F 806R
ERR139396	ggs150	human	child	USA	urban	0.5	female	Yatsunenko2012	Twin2	ERR139396	2332326	illumina	v4	515F 806R
ERR139397	ggs312	human	adult	Venezuela	rural_farming	38	female	Yatsunenko2012	Mother	ERR139397	1978444	illumina	v4	515F 806R
ERR139398	ggs30	human	adult	Malawi	rural_farming	34	female	Yatsunenko2012	Mother	ERR139398	2478050	illumina	v4	515F 806R
ERR139399	ggs231	human	child	Venezuela	rural_farming	1	NA	Yatsunenko2012	unknown	ERR139399	1423522	illumina	v4	515F 806R
ERR139400	ggs174	human	child	USA	urban	0.33	male	Yatsunenko2012	Twin1	ERR139400	2023137	illumina	v4	515F 806R
ERR139401	ggs297	human	child	Venezuela	rural_farming	1	female	Yatsunenko2012	Daughter	ERR139401	1822495	illumina	v4	515F 806R
ERR139402	ggs382	human	adult	USA	urban	50	female	Yatsunenko2012	Mother	ERR139402	1340484	illumina	v4	515F 806R
ERR139403	ggs64	human	child	Malawi	rural_farming	0.8	female	Yatsunenko2012	Twin2	ERR139403	1496750	illumina	v4	515F 806R
ERR139404	ggs295	human	child	Venezuela	rural_farming	2	male	Yatsunenko2012	Brother	ERR139404	831885	illumina	v4	515F 806R
ERR139405	ggs496	human	adult	USA	urban	16	male	Yatsunenko2012	Twin1	ERR139405	1841686	illumina	v4	515F 806R
ERR139406	ggs249	human	adult	Venezuela	rural_farming	49	NA	Yatsunenko2012	unknown	ERR139406	1364671	illumina	v4	515F 806R
ERR139407	ggs404	human	adolescent	USA	urban	14	female	Yatsunenko2012	Twin1	ERR139407	1591374	illumina	v4	515F 806R
ERR139408	ggs503	human	child	USA	urban	9	male	Yatsunenko2012	Brother1	ERR139408	1625436	illumina	v4	515F 806R
ERR139409	ggs239	human	adult	Venezuela	rural_farming	35	female	Yatsunenko2012	Mother	ERR139409	2217530	illumina	v4	515F 806R
ERR139410	ggs394	human	adult	USA	urban	42	female	Yatsunenko2012	Mother	ERR139410	1802920	illumina	v4	515F 806R
ERR139411	ggs111	human	FALSE	Malawi	rural_farming	NA	NA	Yatsunenko2012	Sibling	ERR139411	2269151	illumina	v4	515F 806R
ERR139412	ggs336	human	adult	USA	urban	45	male	Yatsunenko2012	Father	ERR139412	675139	illumina	v4	515F 806R
ERR139413	ggs415	human	adolescent	USA	urban	14	male	Yatsunenko2012	Twin1	ERR139413	1876781	illumina	v4	515F 806R
ERR139414	ggs286	human	adult	Venezuela	rural_farming	60	female	Yatsunenko2012	Mother	ERR139414	967871	illumina	v4	515F 806R
ERR139415	ggs501	human	adult	USA	urban	44	female	Yatsunenko2012	Mother	ERR139415	1824267	illumina	v4	515F 806R
ERR139416	ggs217	human	adult	USA	urban	23	female	Yatsunenko2012	Twin2	ERR139416	2075380	illumina	v4	515F 806R
ERR139417	ggs436	human	adult	USA	urban	16	female	Yatsunenko2012	Twin1	ERR139417	2507930	illumina	v4	515F 806R
ERR139418	ggs187	human	child	USA	urban	0.08	male	Yatsunenko2012	Twin1	ERR139418	1608796	illumina	v4	515F 806R
ERR139419	ggs190	human	child	USA	urban	0.25	female	Yatsunenko2012	Twin2	ERR139419	1367054	illumina	v4	515F 806R
ERR139420	ggs276	human	child	Venezuela	rural_farming	0.75	male	Yatsunenko2012	unknown	ERR139420	2013811	illumina	v4	515F 806R
ERR139421	ggs448	human	adult	USA	urban	48	female	Yatsunenko2012	Mother	ERR139421	2249368	illumina	v4	515F 806R
ERR139422	ggs105	human	child	Malawi	rural_farming	1.25	female	Yatsunenko2012	Twin2	ERR139422	1500930	illumina	v4	515F 806R
ERR139423	ggs420	human	adult	USA	urban	53	female	Yatsunenko2012	Mother	ERR139423	1015179	illumina	v4	515F 806R
ERR139424	ggs82	human	child	Malawi	rural_farming	0.94	female	Yatsunenko2012	Twin2	ERR139424	1154389	illumina	v4	515F 806R
ERR139425	ggs38	human	child	Malawi	rural_farming	2.02	female	Yatsunenko2012	Twin2	ERR139425	676442	illumina	v4	515F 806R
ERR139426	ggs443	human	adult	USA	urban	15	male	Yatsunenko2012	Twin1	ERR139426	928321	illumina	v4	515F 806R
ERR139427	ggs332	human	adult	USA	urban	15	male	Yatsunenko2012	Twin1	ERR139427	1676063	illumina	v4	515F 806R
ERR139428	ggs209	human	child	USA	urban	0.83	female	Yatsunenko2012	Child	ERR139428	1847658	illumina	v4	515F 806R
ERR139429	ggs334	human	adult	USA	urban	35	female	Yatsunenko2012	Mother	ERR139429	1623183	illumina	v4	515F 806R
ERR139430	ggs86	human	child	Malawi	rural_farming	0.6	male	Yatsunenko2012	Twin2	ERR139430	820678	illumina	v4	515F 806R
ERR139431	ggs242	human	child	Venezuela	rural_farming	0.5	NA	Yatsunenko2012	unknown	ERR139431	1532678	illumina	v4	515F 806R
ERR139432	ggs379	human	child	USA	urban	3	male	Yatsunenko2012	Brother1	ERR139432	2326522	illumina	v4	515F 806R
ERR139433	ggs517	human	adult	USA	urban	15	female	Yatsunenko2012	Twin1	ERR139433	1927356	illumina	v4	515F 806R
ERR139434	ggs52	human	child	Malawi	rural_farming	0.67	male	Yatsunenko2012	Twin1	ERR139434	1672876	illumina	v4	515F 806R
ERR139435	ggs19	human	child	Malawi	rural_farming	1.22	male	Yatsunenko2012	Twin1	ERR139435	2022500	illumina	v4	515F 806R
ERR139436	ggs460	human	adolescent	USA	urban	11	male	Yatsunenko2012	Brother1	ERR139436	2733965	illumina	v4	515F 806R
ERR139437	ggs262	human	adolescent	Venezuela	rural_farming	11	male	Yatsunenko2012	Brother	ERR139437	3594894	illumina	v4	515F 806R
ERR139438	ggs450	human	adolescent	USA	urban	14	female	Yatsunenko2012	Twin2	ERR139438	2917359	illumina	v4	515F 806R
ERR139439	ggs130	human	adult	USA	urban	NA	female	Yatsunenko2012	Mother	ERR139439	2044400	illumina	v4	515F 806R
ERR139440	ggs489	human	adult	USA	urban	35	female	Yatsunenko2012	Mother	ERR139440	1861660	illumina	v4	515F 806R
ERR139441	ggs261	human	adult	Venezuela	rural_farming	29	female	Yatsunenko2012	DaughterAdlt	ERR139441	1560016	illumina	v4	515F 806R
ERR139442	ggs456	human	adult	USA	urban	46	male	Yatsunenko2012	Father	ERR139442	2465918	illumina	v4	515F 806R
ERR139443	ggs487	human	adolescent	USA	urban	14	female	Yatsunenko2012	Twin2	ERR139443	3366169	illumina	v4	515F 806R
ERR139444	ggs136	human	adult	USA	urban	56	female	Yatsunenko2012	Mother	ERR139444	2496014	illumina	v4	515F 806R
ERR139445	ggs274	human	child	Venezuela	rural_farming	0.417	female	Yatsunenko2012	Cousin	ERR139445	1744955	illumina	v4	515F 806R
ERR139446	ggs229	human	child	Venezuela	rural_farming	4	NA	Yatsunenko2012	unknown	ERR139446	1777738	illumina	v4	515F 806R
ERR139447	ggs381	human	adult	USA	urban	16	male	Yatsunenko2012	Twin2	ERR139447	1306710	illumina	v4	515F 806R
ERR139448	ggs283	human	adolescent	Venezuela	rural_farming	11	female	Yatsunenko2012	unknown	ERR139448	1986899	illumina	v4	515F 806R
ERR139449	ggs221	human	child	Venezuela	rural_farming	2	male	Yatsunenko2012	unknown	ERR139449	2041099	illumina	v4	515F 806R
ERR139450	ggs291	human	adult	Venezuela	rural_farming	24	female	Yatsunenko2012	Mother	ERR139450	1123864	illumina	v4	515F 806R
ERR139451	ggs72	human	NA	Malawi	rural_farming	NA	NA	Yatsunenko2012	Sibling	ERR139451	1731513	illumina	v4	515F 806R
ERR139452	ggs516	human	adult	USA	urban	17	male	Yatsunenko2012	Twin2	ERR139452	1478785	illumina	v4	515F 806R
ERR139453	ggs206	human	adult	USA	urban	33	female	Yatsunenko2012	Mother	ERR139453	2186708	illumina	v4	515F 806R
ERR139454	ggs92	human	NA	Malawi	rural_farming	NA	NA	Yatsunenko2012	Sibling	ERR139454	1962874	illumina	v4	515F 806R
ERR139455	ggs207	human	child	USA	urban	1.25	female	Yatsunenko2012	Child	ERR139455	2412961	illumina	v4	515F 806R
ERR139456	ggs499	human	adult	USA	urban	41	male	Yatsunenko2012	Father	ERR139456	2006398	illumina	v4	515F 806R
ERR139457	ggs109	human	child	Malawi	rural_farming	2.02	female	Yatsunenko2012	Twin2	ERR139457	1575103	illumina	v4	515F 806R
ERR139458	ggs310	human	adolescent	Venezuela	rural_farming	11	female	Yatsunenko2012	Daughter	ERR139458	1477655	illumina	v4	515F 806R
ERR139459	ggs250	human	child	Venezuela	rural_farming	9	female	Yatsunenko2012	Sister	ERR139459	2058938	illumina	v4	515F 806R
ERR139460	ggs80	human	NA	Malawi	rural_farming	NA	NA	Yatsunenko2012	Sibling	ERR139460	1813225	illumina	v4	515F 806R
ERR139461	ggs9	human	NA	Malawi	rural_farming	NA	NA	Yatsunenko2012	Sibling	ERR139461	2214367	illumina	v4	515F 806R
ERR139462	ggs94	human	child	Malawi	rural_farming	1.7	male	Yatsunenko2012	Twin2	ERR139462	828551	illumina	v4	515F 806R
ERR139463	ggs339	human	adult	USA	urban	48	male	Yatsunenko2012	Father	ERR139463	1484261	illumina	v4	515F 806R
ERR139464	ggs4	human	NA	Malawi	rural_farming	NA	NA	Yatsunenko2012	Sibling	ERR139464	2084945	illumina	v4	515F 806R
ERR139465	ggs96	human	child	Malawi	rural_farming	1.89	male	Yatsunenko2012	Twin1	ERR139465	1580084	illumina	v4	515F 806R
ERR139466	ggs412	human	adolescent	USA	urban	14	female	Yatsunenko2012	Twin1	ERR139466	1792419	illumina	v4	515F 806R
ERR139467	ggs181	human	child	USA	urban	0.75	male	Yatsunenko2012	Twin2	ERR139467	1837739	illumina	v4	515F 806R
ERR139468	ggs56	human	child	Malawi	rural_farming	0.19	male	Yatsunenko2012	Twin2	ERR139468	1833327	illumina	v4	515F 806R
ERR139469	ggs195	human	adult	USA	urban	34	female	Yatsunenko2012	Mother	ERR139469	1622105	illumina	v4	515F 806R
ERR139470	ggs446	human	adult	USA	urban	57	male	Yatsunenko2012	Father	ERR139470	2269459	illumina	v4	515F 806R
ERR139471	ggs269	human	adolescent	Venezuela	rural_farming	11	NA	Yatsunenko2012	unknown	ERR139471	2005789	illumina	v4	515F 806R
ERR139472	ggs530	human	adult	USA	urban	16	female	Yatsunenko2012	Twin1	ERR139472	1654857	illumina	v4	515F 806R
ERR139473	ggs470	human	adult	USA	urban	49	male	Yatsunenko2012	Father	ERR139473	2629771	illumina	v4	515F 806R
ERR139474	ggs399	human	adult	USA	urban	46	male	Yatsunenko2012	Father	ERR139474	1685317	illumina	v4	515F 806R
ERR139475	ggs91	human	adult	Malawi	rural_farming	27	female	Yatsunenko2012	Mother	ERR139475	1785843	illumina	v4	515F 806R
ERR139476	ggs112	human	adult	Malawi	rural_farming	16.72	female	Yatsunenko2012	Twin1	ERR139476	1783290	illumina	v4	515F 806R
ERR139477	ggs388	human	child	USA	urban	8	female	Yatsunenko2012	Sister1	ERR139477	1559628	illumina	v4	515F 806R
ERR139478	ggs449	human	adult	USA	urban	53	male	Yatsunenko2012	Father	ERR139478	2172765	illumina	v4	515F 806R
ERR139479	ggs22	human	child	Malawi	rural_farming	2.21	female	Yatsunenko2012	Twin1	ERR139479	2184481	illumina	v4	515F 806R
ERR139480	ggs341	human	adult	USA	urban	49	female	Yatsunenko2012	Mother	ERR139480	1702229	illumina	v4	515F 806R
ERR139481	ggs529	human	adult	USA	urban	44	male	Yatsunenko2012	Father	ERR139481	1707823	illumina	v4	515F 806R
ERR139482	ggs68	human	adult	Malawi	rural_farming	32	female	Yatsunenko2012	Mother	ERR139482	2383806	illumina	v4	515F 806R
ERR139483	ggs411	human	adult	USA	urban	49	female	Yatsunenko2012	Mother	ERR139483	1755325	illumina	v4	515F 806R
ERR139484	ggs303	human	child	Venezuela	rural_farming	5	male	Yatsunenko2012	unknown	ERR139484	629689	illumina	v4	515F 806R
ERR139485	ggs515	human	adult	USA	urban	17	male	Yatsunenko2012	Twin1	ERR139485	1958662	illumina	v4	515F 806R
ERR139486	ggs316	human	adult	Venezuela	rural_farming	20	female	Yatsunenko2012	Mother	ERR139486	1378119	illumina	v4	515F 806R
ERR139487	ggs507	human	adult	USA	urban	16	male	Yatsunenko2012	Twin2	ERR139487	2203114	illumina	v4	515F 806R
ERR139488	ggs395	human	adolescent	USA	urban	10	male	Yatsunenko2012	Brother1	ERR139488	1880815	illumina	v4	515F 806R
ERR139489	ggs157	human	child	USA	urban	1	female	Yatsunenko2012	Child	ERR139489	2193399	illumina	v4	515F 806R
ERR139490	ggs453	human	adult	USA	urban	48	male	Yatsunenko2012	Father	ERR139490	2380405	illumina	v4	515F 806R
ERR139491	ggs524	human	child	USA	urban	10	male	Yatsunenko2012	Brother1	ERR139491	1652851	illumina	v4	515F 806R
ERR139492	ggs39	human	child	Malawi	rural_farming	2.02	male	Yatsunenko2012	Twin3	ERR139492	1893464	illumina	v4	515F 806R
ERR139493	ggs360	human	adult	USA	urban	49	female	Yatsunenko2012	Mother	ERR139493	2276641	illumina	v4	515F 806R
ERR139494	ggs457	human	child	USA	urban	10	male	Yatsunenko2012	Brother1	ERR139494	3019837	illumina	v4	515F 806R
ERR139495	ggs83	human	adult	Malawi	rural_farming	27	female	Yatsunenko2012	Mother	ERR139495	1526221	illumina	v4	515F 806R
ERR139496	ggs225	human	child	Venezuela	rural_farming	6	female	Yatsunenko2012	unknown	ERR139496	1171365	illumina	v4	515F 806R
ERR139497	ggs2	human	child	Malawi	rural_farming	1.53	female	Yatsunenko2012	Twin2	ERR139497	1918403	illumina	v4	515F 806R
ERR139498	ggs483	human	adolescent	USA	urban	14	female	Yatsunenko2012	Twin1	ERR139498	3146638	illumina	v4	515F 806R
ERR139499	ggs186	human	child	USA	urban	0.42	male	Yatsunenko2012	Twin2	ERR139499	1253121	illumina	v4	515F 806R
ERR139500	ggs437	human	adult	USA	urban	16	male	Yatsunenko2012	Twin2	ERR139500	1940263	illumina	v4	515F 806R
ERR139501	ggs437	human	adult	USA	urban	16	male	Yatsunenko2012	Twin2	ERR139501	4	illumina	v4	515F 806R
ERR139502	ggs211	human	child	USA	urban	3	male	Yatsunenko2012	Child	ERR139502	1786348	illumina	v4	515F 806R
ERR139503	ggs175	human	child	USA	urban	0.33	male	Yatsunenko2012	Twin2	ERR139503	1489159	illumina	v4	515F 806R
ERR139504	ggs62	human	NA	Malawi	rural_farming	NA	NA	Yatsunenko2012	Sibling	ERR139504	2437210	illumina	v4	515F 806R
ERR139505	ggs101	human	child	Malawi	rural_farming	0.76	male	Yatsunenko2012	Twin2	ERR139505	1849909	illumina	v4	515F 806R
ERR139506	ggs298	human	child	Venezuela	rural_farming	1	male	Yatsunenko2012	Son	ERR139506	1037968	illumina	v4	515F 806R
ERR139507	ggs426	human	adult	USA	urban	15	female	Yatsunenko2012	Twin2	ERR139507	2420906	illumina	v4	515F 806R
ERR139508	ggs358	human	adolescent	USA	urban	13	female	Yatsunenko2012	Twin2	ERR139508	2530320	illumina	v4	515F 806R
ERR139509	ggs10	human	adult	Malawi	rural_farming	38	female	Yatsunenko2012	Mother	ERR139509	1238227	illumina	v4	515F 806R
ERR139510	ggs509	human	adult	USA	urban	57	male	Yatsunenko2012	Father	ERR139510	1772867	illumina	v4	515F 806R
[truncated: 33 more rows]

## Sheet: Table_S2_OTUtaxonomy
Table S2. The top-hits taxonomy for soil-core OTUs from a BLAST search against the NCBI 16S rRNA database and the average abundance of each OTU relative to the total soil-core OTU sequences found among each host.
	NCBI BLAST results								OTU proportions of soil-core community by host
OTU	Taxonomy	NCBI_Description	MaxScore	TotalScore	QueryCover	Evalue	PercentID	Accession	beetle	bonobo	chimp	cockroach	cricket	fungal_comb	gorilla	human	termite
OTU1	Bradyrhizobium_lupini	>Bradyrhizobium lupini strain USDA 3051 16S ribosomal RNA,...	739	739	1	0	100	NR_134836.1	0	0.00467968	0.0342117	0	0	0.806098	0.00268073	0.00253505	0.263428
OTU10	Tepidisphaera_mucosa	>Tepidisphaera mucosa strain 2842 16S ribosomal RNA, partial...	529	529	1	5e-150	90.52	NR_148582.1	0	0	0	0	0	0	1.0195e-05	9.11756e-05	0.000191316
OTU100	Devosia_insulae	>Devosia insulae DS-56 16S ribosomal RNA, partial sequence	723	723	1	0	99.25	NR_044036.1	0.00793651	0.01024	0.0205552	0	0	0.000197249	0.0159151	0.00220732	0.00266712
OTU104	Rhizomicrobium_palustre	>Rhizomicrobium palustre strain A48 16S ribosomal RNA, partial...	579	579	1	5e-165	92.75	NR_112186.1	0	0.000715214	0.00226301	0	0	0	9.02806e-05	0.000328642	0
OTU107	Tepidisphaera_mucosa	>Tepidisphaera mucosa strain 2842 16S ribosomal RNA, partial...	427	427	1	2e-119	86.03	NR_148582.1	0	0	0	0	0	0	0	2.25993e-05	0
OTU1095	Vicinamibacter_silvestris	>Vicinamibacter silvestris strain Ac_5_C6 16S ribosomal RNA,...	577	577	0.99	2e-164	92.75	NR_151905.1	0	0	0.0106743	0	0	0	5.28834e-05	7.84864e-05	0.000244507
OTU11	Bacillus_oryzisoli	>Bacillus oryzisoli strain 1DS3-10 16S ribosomal RNA, partial...	717	717	1	0	99	NR_151979.1	0	0.0031298	0.0228192	0.00682387	0.000764135	0.0661027	0.00258972	0.0310967	0.108028
OTU113	Chthoniobacter_flavus	>Chthoniobacter flavus Ellin428 16S ribosomal RNA, partial...	612	612	1	5e-175	94.28	NR_115225.1	0	0.000580728	0.0012548	0	0	0	5.22928e-05	0.000112896	0
OTU11398	Flavitalea_populi	>Flavitalea populi strain HY-50R 16S ribosomal RNA, partial...	712	712	1	0	98.75	NR_117796.1	0	0.00015667	0.000487003	0	0	0	0.000154854	5.29182e-05	0
OTU119	Angustibacter_speluncae	>Angustibacter speluncae strain YC2-20 16S ribosomal RNA, parti...	673	673	1	0	97	NR_158006.1	0	9.78917e-05	0.00240018	0.00682387	0	0	4.43887e-05	0.00135861	0.00141623
OTU1228	Pseudoflavitalea_rhizosphaerae	>Pseudoflavitalea rhizosphaerae strain T16R-265 16S ribosomal...	623	623	1	2e-178	94.78	NR_152044.1	0	0.000142653	0.000653056	0.00682387	0	0	0	0.000114825	0
OTU1270	Kofleria_flava	>Kofleria flava strain Pl vt1 16S ribosomal RNA, partial sequence	529	529	1	5e-150	90.59	NR_041981.1	0	0.000730744	0.00101325	0	0	0	0.000126535	4.31769e-05	0.000173447
OTU128	Blastochloris_viridis	>Blastochloris viridis strain DSM 133 16S ribosomal RNA, partia...	634	634	1	0	95.25	NR_117911.1	0.00396825	0.000261311	0.00191318	0	0	0	0.000285174	0.000712597	0.000676825
OTU1280	Singulisphaera_rosea	>Singulisphaera rosea strain S26 16S ribosomal RNA, partial...	621	621	1	9e-178	94.75	NR_116969.1	0	0.000561356	0.00756568	0	0	0.000197249	0.000269482	0.000171628	0.000770636
OTU13	Tepidisphaera_mucosa	>Tepidisphaera mucosa strain 2842 16S ribosomal RNA, partial...	523	523	1	3e-148	90.25	NR_148582.1	0	0	0	0	0	0	0	0.000365412	0.000181637
OTU1303	Vicinamibacter_silvestris	>Vicinamibacter silvestris strain Ac_5_C6 16S ribosomal RNA,...	556	556	1	3e-158	91.77	NR_151905.1	0	0.000314982	0.0259971	0	0	0	0.000399229	0.00013812	0.00293592
OTU132	Povalibacter_uvarum	>Povalibacter uvarum strain Zumi 37 16S ribosomal RNA, partial...	723	723	1	0	99.25	NR_126172.1	0	0.000660377	0.00779127	0	0	0	0.00053153	0.000468239	0.000331
OTU135	Ilumatobacter_fluminis	>Ilumatobacter fluminis YM22-133 16S ribosomal RNA, partial...	662	662	1	0	96.5	NR_041633.1	0.0357143	0.00010184	0.00754906	0.00682387	0	0	8.03467e-05	0.000341177	0.000531087
OTU14	Tepidisphaera_mucosa	>Tepidisphaera mucosa strain 2842 16S ribosomal RNA, partial...	496	496	1	6e-140	89	NR_148582.1	0	0	0	0	0	0	0	4.47223e-05	0.000167343
OTU148	Stenotrophobacter_terrae	>Stenotrophobacter terrae strain Ac_28_D10 16S ribosomal RNA,...	667	667	1	0	96.75	NR_146023.1	0	0	0.00312358	0.0136477	0	0	4.20217e-06	0.000284615	0
OTU15	Stenotrophobacter_terrae	>Stenotrophobacter terrae strain Ac_28_D10 16S ribosomal RNA,...	678	678	1	0	97.25	NR_146023.1	0	0	0.00157794	0.0272955	0	0	2.20097e-05	0.000603629	0.000761428
OTU150	Dactylosporangium_matsuzakiense	>Dactylosporangium matsuzakiense strain IFO 14259 16S ribosomal...	739	739	1	0	100	NR_115648.1	0	0.000463758	0.00283502	0	0	0.000395833	0.000247251	0.000424728	0
OTU154	Mycobacterium_triplex	>Mycobacterium triplex strain 90-1019 16S ribosomal RNA, partia...	717	717	1	0	99	NR_044791.1	0	0.00119495	0.00232896	0	0	0.00178125	0.000241776	0.000362254	0.000210582
OTU16	Niveispirillum_lacus	>Niveispirillum lacus strain 1-14 16S ribosomal RNA, partial...	601	601	1	1e-171	93.78	NR_159344.1	0	0	0	0	0	0	0	0.000118618	0.000865773
OTU160	Sulfurisoma_sediminicola	>Sulfurisoma sediminicola strain BSN1 16S ribosomal RNA, partia...	601	601	1	1e-171	93.78	NR_125471.1	0	0	0	0	0	0	0	3.14889e-05	0
OTU1603	Blastochloris_sulfoviridis	>Blastochloris sulfoviridis strain P1 16S ribosomal RNA, partia...	678	678	1	0	97.25	NR_037121.1	0.0119048	0.000323211	0.00669404	0	0	0	0.000993017	2.37274e-06	0.000365743
OTU161	Bacillus_cucumis	>Bacillus cucumis strain AP-6 16S ribosomal RNA, partial sequence	739	739	1	0	100	NR_148626.1	0.00793651	0.0147396	0.0830254	0.156601	0	0.013457	0.0162518	0.00995672	0.0965191
OTU1618	Solirubrobacter_phytolaccae	>Solirubrobacter phytolaccae strain GTGR-8 16S ribosomal RNA,...	739	739	1	0	100	NR_133858.1	0	0.000513854	0.0117137	0	0	0.000197249	0.000112291	0.00049533	0.000635688
OTU164	Rhizobium_azooxidifex	>Rhizobium azooxidifex strain Po 20/26 16S ribosomal RNA, parti...	728	728	1	0	99.5	NR_144599.1	0.0396825	0.0176249	0.0503121	0.00682387	0.0022924	0	0.00899167	0.00348505	0.0117147
OTU172	Solirubrobacter_phytolaccae	>Solirubrobacter phytolaccae strain GTGR-8 16S ribosomal RNA,...	551	551	1	1e-156	91.52	NR_133858.1	0	0.00107507	0.00450733	0	0	0	0.000210227	0.000339709	0.00811282
OTU1799	Sphingomonas_starnbergensis	>Sphingomonas starnbergensis strain 382 16S ribosomal RNA,...	695	695	1	0	98	NR_118124.1	0.00396825	0.000142653	0	0	0	0	0	0.000241065	0.000636656
OTU189	Luteitalea_pratensis	>Luteitalea pratensis strain HEG_-6_39 16S ribosomal RNA, parti...	586	586	1	3e-167	93.03	NR_156918.1	0	0	0.000475391	0	0	0	0	0	0
OTU19	Streptomyces_pseudovenezuelae	>Streptomyces pseudovenezuelae strain ISP 5212 16S ribosomal RN...	739	739	1	0	100	NR_114832.1	0.015873	0.263942	0.0192849	0.026948	0	0.0138461	0.00237897	0.000300887	0.02808
OTU197	Erythrobacter_aquimixticola	>Erythrobacter aquimixticola strain JSSK-14 16S ribosomal RNA,...	689	689	1	0	97.75	NR_157793.1	0.0119048	0.000354551	0.00444253	0	0	0.000197249	0.00102165	0.00171574	0.000186762
OTU2	Sphingomonas_melonis	>Sphingomonas melonis strain DAPP-PG 224 16S ribosomal RNA,...	723	723	1	0	99.25	NR_028626.1	0	0.022276	0.0184073	0.00881225	0	0.000789664	0.011826	0.00691872	0.125588
OTU20	Rhodoplanes_azumiensis	>Rhodoplanes azumiensis strain TUT3581 16S ribosomal RNA, parti...	662	662	1	0	96.51	NR_159239.1	0.0238095	0.0192939	0.0221532	0.000726177	0	0.00158266	0.0120721	0.000440231	0.14957
OTU205	Phenylobacterium_panacis	>Phenylobacterium panacis strain DCY 109 16S ribosomal RNA,...	734	734	1	0	99.75	NR_149786.1	0.00396825	0.0128476	0.00914071	0	0	0	0.00125727	0.00120987	0.00240636
OTU206	Acidibacter_ferrireducens	>Acidibacter ferrireducens strain MCF85 16S ribosomal RNA,...	601	601	1	1e-171	93.8	NR_126260.1	0	8.53433e-05	0.00371875	0	0	0	0.000127933	0.000544622	0
OTU2083	Vicinamibacter_silvestris	>Vicinamibacter silvestris strain Ac_5_C6 16S ribosomal RNA,...	560	560	0.99	2e-159	92	NR_151905.1	0	0	0.00192479	0	0	0	0	9.66039e-05	0
OTU22	Blastococcus_colisei	>Blastococcus colisei strain BMG 822 16S ribosomal RNA, partial...	734	734	1	0	99.75	NR_149176.1	0	9.23289e-05	0.00256574	0	0	0	0	0.00147725	0.00158358
OTU220	Solirubrobacter_ginsenosidimutans	>Solirubrobacter ginsenosidimutans strain BXN5-15 16S ribosomal...	684	684	1	0	97.5	NR_108192.1	0	0	0.01364	0	0	0	1.25656e-05	0.000295479	0
OTU23	Chitinophaga_polysaccharea	>Chitinophaga polysaccharea strain MRP-15 16S ribosomal RNA,...	612	612	1	5e-175	94.28	NR_125662.1	0	0	0	0.00682387	0	0	0	0.000406662	0
OTU232	Tepidisphaera_mucosa	>Tepidisphaera mucosa strain 2842 16S ribosomal RNA, partial...	562	562	1	5e-160	92	NR_148582.1	0	7.66801e-05	0.000475391	0	0	0	9.23851e-06	7.20075e-06	0
OTU242	Solirubrobacter_taibaiensis	>Solirubrobacter taibaiensis strain GTJR-20 16S ribosomal RNA,...	645	645	1	0	95.76	NR_134176.1	0	9.20709e-05	0.00302574	0	0	0	3.13525e-06	6.55668e-05	0.000354058
OTU263	Zhizhongheella_caldifontis	>Zhizhongheella caldifontis strain YIM 78140 16S ribosomal RNA,...	701	701	1	0	98.25	NR_134232.1	0.015873	0.0180563	0.00843864	0	0	0	0.00329867	0.0842584	0.000204614
OTU2692	Opitutus_terrae	>Opitutus terrae PB90-1 16S ribosomal RNA, partial sequence	651	651	1	0	96	NR_028890.1	0	9.78917e-05	0	0	0	0.000197249	5.09752e-06	0	0.000177029
OTU2748	Paludibaculum_fermentans	>Paludibaculum fermentans strain P105 16S ribosomal RNA, partia...	556	556	1	3e-158	91.75	NR_134120.1	0	0.000406037	0.00399807	0.102358	0	0	0.000651761	9.85679e-05	7.42465e-05
OTU276	Brevundimonas_vesicularis	>Brevundimonas vesicularis strain Busing 16S ribosomal RNA,...	651	651	1	0	96	NR_037104.1	0	0.000441977	0.000704203	0.0213761	0	0	0.000113398	7.38474e-05	0.00134395
OTU28	Gemmatimonas_phototrophica	>Gemmatimonas phototrophica strain AP64 16S ribosomal RNA,...	409	409	1	7e-114	85.11	NR_136770.1	0.0952381	0	0.00852483	0	0.000764135	0	8.95353e-06	0.00063112	0.000177029
OTU2850	Gaiella_occulta	>Gaiella occulta strain F2-233 16S ribosomal RNA, partial sequence	628	628	1	5e-180	95	NR_118138.1	0	0	0.00209293	0	0	0	0.000155788	2.50125e-05	0.00130628
OTU29	Microvirga_aerilata	>Microvirga aerilata strain NBRC 106137 16S ribosomal RNA,...	728	728	1	0	99.5	NR_114298.1	0	7.13267e-05	0.0122993	0.0351192	0.00433262	0	0.000178707	0.00236422	0.00328387
OTU2906	Luteitalea_pratensis	>Luteitalea pratensis strain HEG_-6_39 16S ribosomal RNA, parti...	571	571	0.99	9e-163	92.5	NR_156918.1	0	0	0.00222688	0	0	0	1.88921e-05	3.34112e-06	0
OTU299	Nocardioides_islandensis	>Nocardioides islandensis strain MSL 26 16S ribosomal RNA,...	728	728	1	0	99.5	NR_044235.1	0	0.000462979	0.00357614	0	0	0	8.67116e-05	0.000113496	0
OTU30	Kribbella_qitaiheensis	>Kribbella qitaiheensis strain NEAU-GQTH2-3 16S ribosomal RNA,...	739	739	1	0	100	NR_148308.1	0	0	0.000487003	0	0	0	4.44285e-05	6.11829e-05	0.00106217
OTU309	Gemmata_massiliana	>Gemmata massiliana strain IIL30 16S ribosomal RNA, partial...	676	676	1	0	97.25	NR_148576.1	0	0.000171945	0.00227666	0	0	0	6.24114e-05	0.000218152	0.000638216
OTU312	Opitutus_terrae	>Opitutus terrae PB90-1 16S ribosomal RNA, partial sequence	617	617	1	1e-176	94.5	NR_028890.1	0	0.000555353	0.00183593	0	0	0	5.61072e-05	2.89691e-05	0
OTU327	Chthoniobacter_flavus	>Chthoniobacter flavus Ellin428 16S ribosomal RNA, partial...	523	523	1	3e-148	90.3	NR_115225.1	0	0.000584843	0.00241656	0	0	0	4.04991e-05	9.26545e-05	0.000306099
OTU333	Tepidisphaera_mucosa	>Tepidisphaera mucosa strain 2842 16S ribosomal RNA, partial...	473	473	1	3e-133	88	NR_148582.1	0	0	0	0	0	0	0	0.00118207	0
OTU3331	Pseudolabrys_taiwanensis	>Pseudolabrys taiwanensis strain CC-BB4 16S ribosomal RNA,...	662	662	1	0	96.51	NR_043515.1	0.00396825	0.00413463	0.0229111	0	0	0	0.00546678	0.000348392	0.00209978
OTU3569	Dehalogenimonas_alkenigignens	>Dehalogenimonas alkenigignens strain IP3-3 16S ribosomal RNA,...	442	442	0.99	7e-124	86.75	NR_109657.1	0	7.66801e-05	0.0049753	0	0	0	1.02977e-05	0	0.000622597
OTU36	Solirubrobacter_ginsenosidimutans	>Solirubrobacter ginsenosidimutans strain BXN5-15 16S ribosomal...	579	579	1	5e-165	92.77	NR_108192.1	0	0	0.0202977	0	0	0	0	0.000506262	0
OTU369	Pseudolabrys_taiwanensis	>Pseudolabrys taiwanensis strain CC-BB4 16S ribosomal RNA,...	651	651	1	0	96	NR_043515.1	0.00396825	0.00039014	0.00429426	0	0	0	0.000281678	0.000623951	0.000167603
OTU37	Pseudonocardia_yunnanensis	>Pseudonocardia yunnanensis strain IMSNU 22019 16S ribosomal RN...	695	695	1	0	98	NR_041999.1	0	0.0019649	0.00579995	0	0	0	0.000170687	0.00211373	0.000177029
OTU3710	Solirubrobacter_ginsenosidimutans	>Solirubrobacter ginsenosidimutans strain BXN5-15 16S ribosomal...	651	651	1	0	96	NR_108192.1	0	0	0.014148	0	0	0	1.2873e-05	0.000277554	0.000843072
OTU373	Vicinamibacter_silvestris	>Vicinamibacter silvestris strain Ac_5_C6 16S ribosomal RNA,...	529	529	1	5e-150	90.5	NR_151905.1	0	0.000218625	0	0	0	0	2.11425e-05	8.91216e-05	0.000453303
OTU3785	Frankia_alni	>Frankia alni ACN14a strain ACN14A 16S ribosomal RNA, complete...	723	723	1	0	99.25	NR_153674.1	0	0.000142653	0.00236271	0	0	0.00197316	8.84438e-05	0.00136313	0.00106217
OTU379	Nitrosospira_multiformis	>Nitrosospira multiformis strain ATCC 25196 16S ribosomal RNA,...	538	538	0.99	9e-153	90.98	NR_112159.1	0	0.000120733	0.00655814	0	0	0	6.12207e-05	0.000196439	0.000320501
OTU389	Pseudonocardia_profundimaris	>Pseudonocardia profundimaris strain GY0556 16S ribosomal RNA,...	689	689	1	0	97.75	NR_156947.1	0	0.00196534	0.0234219	0	0	0	0.000330809	0.00228714	0.00227687
OTU395	Vitiosangium_cumulatum	>Vitiosangium cumulatum strain MCy10943 16S ribosomal RNA,...	689	689	1	0	97.75	NR_156939.1	0	0.000538576	0.00556102	0.0341193	0	0	0.000183647	0.000460856	0.00326625
OTU4	Sphingomonas_limnosediminicola	>Sphingomonas limnosediminicola strain 03SUJ6 16S ribosomal RNA...	739	739	1	0	100	NR_157773.1	0	0.000105696	0.0462871	0	0	0	5.25637e-05	0.00462555	0.004197
OTU409	Solirubrobacter_ginsenosidimutans	>Solirubrobacter ginsenosidimutans strain BXN5-15 16S ribosomal...	579	579	0.99	5e-165	92.95	NR_108192.1	0	0	0.00285235	0	0	0	9.24527e-06	7.80464e-05	0
OTU4097	Micropepsis_pineolensis	>Micropepsis pineolensis strain CS4 16S ribosomal RNA, partial...	590	590	1	2e-168	93.28	NR_156848.1	0	0	0	0	0	0	0	3.72462e-05	0
OTU42	Bradyrhizobium_lupini	>Bradyrhizobium lupini strain USDA 3051 16S ribosomal RNA,...	656	656	1	0	96.27	NR_134836.1	0.00396825	0.00108784	0.00494111	0	0	0	0.00108685	0.000512312	0.000354058
OTU43	Gaiella_occulta	>Gaiella occulta strain F2-233 16S ribosomal RNA, partial sequence	645	645	1	0	95.75	NR_118138.1	0	0	0.00600084	0	0	0	0.000156086	0.000120218	0.00588862
OTU436	Sphingomonas_wittichii	>Sphingomonas wittichii RW1 16S ribosomal RNA, partial sequence	701	701	1	0	98.25	NR_074268.1	0.00793651	0.00820097	0.00310319	0	0	0	0.000332014	0.00115642	0.000443377
OTU443	Haliangium_tepidum	>Haliangium tepidum strain SMP-10 16S ribosomal RNA, partial...	545	545	1	5e-155	91.29	NR_024781.1	0	0.000120733	0.000950782	0	0	0	0.00034963	0.000203248	0
OTU455	Vicinamibacter_silvestris	>Vicinamibacter silvestris strain Ac_5_C6 16S ribosomal RNA,...	540	540	1	3e-153	91	NR_151905.1	0	0.000321863	0.00213457	0	0	0	0.0001504	0.000124601	0.0017098
OTU459	Massilia_aurea	>Massilia aurea strain AP13 16S ribosomal RNA, partial sequence	717	717	1	0	99	NR_042502.1	0.00793651	0.000707923	0.0440085	0	0	0	0.000304086	0.00551309	0.000158052
OTU475	Novosphingobium_chloroacetimidivorans	>Novosphingobium chloroacetimidivorans strain BUT-14 16S...	728	728	1	0	99.5	NR_134105.1	0.00793651	0.0852312	0.00699132	0	0	0	0.0409167	0.00122222	0.0156065
OTU5	Pseudarthrobacter_phenanthrenivorans	>Pseudarthrobacter phenanthrenivorans Sphe3 16S ribosomal RNA,...	739	739	1	0	100	NR_074770.2	0.00396825	0.0553589	0.0227928	0	0.00305654	0.000197249	0.013265	0.0220257	0.00932426
OTU51	Reyranella_soli	>Reyranella soli strain KIS14-15 16S ribosomal RNA, partial...	728	728	1	0	99.5	NR_109674.1	0	7.66801e-05	0.00216118	0	0	0	9.75596e-05	3.46616e-06	0.00160898
OTU55	Paludibaculum_fermentans	>Paludibaculum fermentans strain P105 16S ribosomal RNA, partia...	601	601	1	1e-171	93.75	NR_134120.1	0	0	0.000475391	0.0341193	0	0	0	0.000495272	0
OTU56	Marmoricola_aquaticus	>Marmoricola aquaticus strain CBMAI 1089 16S ribosomal RNA,...	728	728	1	0	99.5	NR_136499.1	0	0.000220792	0.00331588	0	0	0	0.00102034	0.000153487	0.00311602
OTU586	Reyranella_graminifolii	>Reyranella graminifolii strain Wo-34 16S ribosomal RNA, partia...	689	689	1	0	97.76	NR_126180.1	0.015873	0.000207336	0.00182709	0.00440612	0	0	0.000118249	9.88841e-05	0.00254557
OTU613	Dehalogenimonas_alkenigignens	>Dehalogenimonas alkenigignens strain IP3-3 16S ribosomal RNA,...	436	436	0.99	3e-122	86.5	NR_109657.1	0.0238095	0	0.0137844	0	0	0	0.000137667	0.000255299	0.00041774
OTU62	Mycolicibacterium_tusciae	>Mycolicibacterium tusciae strain CIP 106367 16S ribosomal RNA,...	739	739	1	0	100	NR_117885.1	0	0.0153464	0.00476364	0.00440612	0.000764135	0.068671	0.000805168	0.00114018	0.00267079
OTU64	Tepidisphaera_mucosa	>Tepidisphaera mucosa strain 2842 16S ribosomal RNA, partial...	462	462	1	6e-130	87.5	NR_148582.1	0	0	0	0	0	0	0	3.13328e-05	8.22246e-05
OTU6539	Bauldia_consociata	>Bauldia consociata strain 11 16S ribosomal RNA, partial sequence	684	684	1	0	97.51	NR_044600.1	0	0	0.00237017	0	0	0	2.3509e-05	0.000148254	0
OTU66	Actinoplanes_nipponensis	>Actinoplanes nipponensis strain IFO 14063 16S ribosomal RNA,...	734	734	1	0	99.75	NR_133688.1	0.00396825	0.00376092	0.0145918	0	0	0.0130365	0.00104027	0.00725066	0.00383036
OTU68	Bacillus_huizhouensis	>Bacillus huizhouensis strain GSS03 16S ribosomal RNA, partial...	725	725	1	0	99.25	NR_133974.1	0.00396825	0.243017	0.0447634	0.397665	0.983441	0.0106875	0.738027	0.105658	0.0443969
OTU7004	Vicinamibacter_silvestris	>Vicinamibacter silvestris strain Ac_5_C6 16S ribosomal RNA,...	529	529	1	5e-150	90.55	NR_151905.1	0	0.000861263	0.00663434	0	0	0	7.02789e-05	0	0.000167343
OTU709	Dehalogenimonas_alkenigignens	>Dehalogenimonas alkenigignens strain IP3-3 16S ribosomal RNA,...	394	394	0.99	2e-109	84.79	NR_109657.1	0	0.000438685	0.00365497	0.0272955	0	0	0.000210883	7.51266e-05	0.000113118
OTU72	Ancylobacter_pratisalsi	>Ancylobacter pratisalsi strain E130 16S ribosomal RNA, partial...	678	678	1	0	97.25	NR_159167.1	0	0.00115672	0.018159	0	0	0	0.000913737	0.000289103	0.000258461
OTU75	Solirubrobacter_phytolaccae	>Solirubrobacter phytolaccae strain GTGR-8 16S ribosomal RNA,...	551	551	0.99	1e-156	91.71	NR_133858.1	0.031746	0.000291014	0.00780879	0	0	0	0.000211574	4.16872e-06	0.00107566
OTU753	Nitrosospira_multiformis	>Nitrosospira multiformis strain ATCC 25196 16S ribosomal RNA,...	538	538	0.99	9e-153	91.02	NR_112159.1	0	0	0.000962394	0	0	0	3.92801e-06	0.000925175	0.000177029
OTU754	Actinoplanes_globisporus	>Actinoplanes globisporus strain IFO 13912 16S ribosomal RNA,...	723	723	1	0	99.25	NR_112101.1	0	0.000285805	0.00123723	0	0	0	8.97256e-05	0.00170148	0
OTU76	Tepidisphaera_mucosa	>Tepidisphaera mucosa strain 2842 16S ribosomal RNA, partial...	523	523	1	3e-148	90.25	NR_148582.1	0	0	0	0	0	0	0	0.00020619	0
OTU77	Conyzicola_nivalis	>Conyzicola nivalis strain ZD5-4 16S ribosomal RNA, partial...	739	739	1	0	100	NR_157704.1	0.00396825	0.0928103	0.0642203	0.0466017	0.00458481	0.000197916	0.0694947	0.00691257	0.0156953
OTU788	Ramlibacter_tataouinensis	>Ramlibacter tataouinensis TTB310 16S ribosomal RNA, partial...	695	695	1	0	98.01	NR_074643.1	0.0119048	0.0565134	0.0280481	0	0	0	0.0300733	0.664747	0.0345395
OTU80	Ilumatobacter_fluminis	>Ilumatobacter fluminis YM22-133 16S ribosomal RNA, partial...	584	584	1	1e-166	93	NR_041633.1	0	7.13267e-05	0.000427398	0	0	0	0.00011726	5.34061e-05	0.000177029
OTU81	Blastocatella_fastidiosa	>Blastocatella fastidiosa strain A2-16 16S ribosomal RNA, parti...	723	723	1	0	99.25	NR_118350.1	0	0	0.0023638	0	0	0	0.000208623	0.00130713	0.000708237
OTU818	Blastochloris_sulfoviridis	>Blastochloris sulfoviridis strain P1 16S ribosomal RNA, partia...	662	662	1	0	96.5	NR_037121.1	0.00793651	0	0.000779404	0	0	0	2.43026e-05	5.66801e-05	0.0013543
OTU84	Gemmatimonas_phototrophica	>Gemmatimonas phototrophica strain AP64 16S ribosomal RNA,...	490	490	1	3e-138	88.86	NR_136770.1	0	0	0	0	0	0	0	0.00048704	0
OTU847	Chthoniobacter_flavus	>Chthoniobacter flavus Ellin428 16S ribosomal RNA, partial...	523	523	1	3e-148	90.32	NR_115225.1	0	0	0	0	0	0	2.21878e-05	0.000175014	0.000149269
OTU862	Nocardioides_massiliensis	>Nocardioides massiliensis strain GD13 16S ribosomal RNA, parti...	717	717	1	0	99	NR_144693.1	0	0.0142013	0.00681834	0	0	0	0.00415778	0.000228945	0.00387322
OTU91	Mesorhizobium_thiogangeticum	>Mesorhizobium thiogangeticum strain SJT 16S ribosomal RNA,...	723	723	1	0	99.25	NR_042358.1	0.571429	0.00057055	0.00958123	0.0175596	0	0.000197249	0.000951917	0.000938575	0.0134008
OTU948	Mycolicibacterium_chitae	>Mycolicibacterium chitae strain 2502 16S ribosomal RNA, partia...	704	704	1	0	98.5	NR_029220.1	0	0.0109063	0.021088	0	0	0	0.00482819	0.000664359	0.000566563
OTU95	Micropepsis_pineolensis	>Micropepsis pineolensis strain CS4 16S ribosomal RNA, partial...	556	556	1	3e-158	91.77	NR_156848.1	0	0.000215993	0.000475391	0	0	0	0.000168222	0	0
OTU953	Luteitalea_pratensis	>Luteitalea pratensis strain HEG_-6_39 16S ribosomal RNA, parti...	580	580	1	1e-165	92.79	NR_156918.1	0	0	0.0167935	0	0	0	8.94814e-05	0.000279913	0.000382783
OTU974	Herbidospora_soli	>Herbidospora soli strain PS42-9 16S ribosomal RNA, partial...	383	383	0.99	5e-106	84.25	NR_159270.1	0	0	0.00138979	0	0	0	1.67413e-05	0.000136728	0
OTU98	Nitrosospira_tenuis	>Nitrosospira tenuis strain Nv1 16S ribosomal RNA, partial...	577	577	0.99	2e-164	92.77	NR_114773.1	0	0	0.000475391	0	0	0	9.43371e-06	0.00223832	0
OTU980	Vicinamibacter_silvestris	>Vicinamibacter silvestris strain Ac_5_C6 16S ribosomal RNA,...	512	512	1	6e-145	89.78	NR_151905.1	0.00793651	0	0.00923924	0	0	0	3.04689e-05	0.000193768	0.00181387
